# Supplementary material for: Iron-catalyzed direct α-arylation of α-amino carbonyl compounds with indoles
Source: Royal Society of Chemistry journal article supplement (doi:10.1039/c5ob02325d), 2015-12-23
Supplement: c5ob02325d1.pdf [file c5ob02325d1.pdf]

# Iron-catalyzed direct $\alpha$ -arylation of $\alpha$ -amino carbonyl compounds with indoles

Yan Zhang, Minjie Ni and Bainian Feng\*

School of Pharmaceutical Science, Jiangnan University, Wuxi 214122, P. R. China. E-mail:

zhangyan@jiangnan.edu.cn; Fax: (+86)-0510-85197052

## Supporting Information

### Table of Contents

|                                                                                                        |    |
|--------------------------------------------------------------------------------------------------------|----|
| <b>1. General Information</b> .....                                                                    | 2  |
| <b>2. General Procedure</b> .....                                                                      | 2  |
| 2.1 Synthesis of substrates <b>2</b> .....                                                             | 2  |
| 2.2 Optimization of the reaction condition .....                                                       | 3  |
| 2.3 $\alpha$ -Arylation of amino carbonyl compounds via $\text{Fe}(\text{ClO}_4)_3$ catalysis<br>..... | 3  |
| 2.4 Mechanistic experiments .....                                                                      | 4  |
| <b>3. Characterizations of products</b> .....                                                          | 7  |
| <b>4. <math>^1\text{H}</math> and <math>^{13}\text{C}</math> NMR spectra of products</b> .....         | 23 |
| <b>5. Refernces (cited in SI)</b> .....                                                                | 65 |

## 1. General Information

Commercially available materials were used as purchased. Proton nuclear magnetic resonance ( $^1\text{H}$  NMR) spectra were recorded on Bruker AV400 (400MHz) spectrometers. Chemical shifts were recorded in parts per million (ppm,  $\delta$ ) relative to tetramethylsilane ( $\delta$  0.00) or chloroform ( $\delta = 7.26$ , singlet).  $^1\text{H}$  NMR splitting patterns are designated as singlet (s), doublet (d), triplet (t), quartet (q), dd (doublet of doublets), m (multiplets), and etc. All first-order splitting patterns were assigned on the basis of the appearance of the multiplet. Splitting patterns that could not be easily interpreted are designated as multiplet (m) or broad (br). Carbon nuclear magnetic resonance ( $^{13}\text{C}$  NMR) spectra were recorded on a Bruker AV 400 (400MHz) spectrometers. Reactions were checked for completion by TLC (silica gel 60 F254).

## 2. General Procedure

### 2.1 Synthesis of substrates 2

The substrates **2a-2k** were synthesized according to literature procedures<sup>S1, S2, S3</sup>.

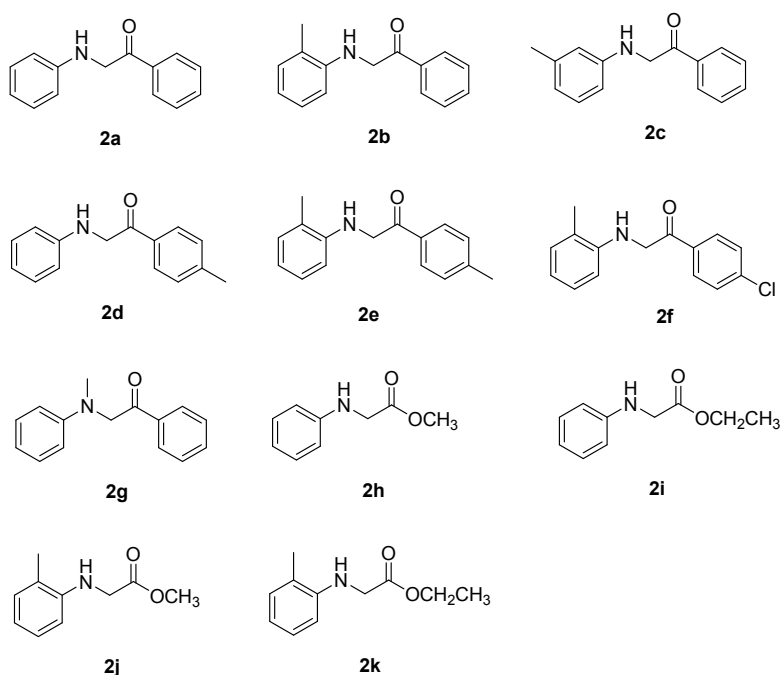

Aniline (6.5 mL, 70 mmol) and bromoacetophenone (6.7 g, 35 mmol) were combined in MeCN (70 mL) and allowed to stand at r.t. for 24 h. Solid aniline-HBr was filtered off and the filtrate was concentrated under vacuum. The residue was dissolved in EtOAc (100 mL) and extracted sequentially with H<sub>2</sub>O (50 mL), 5% citric acid (50 mL), and brine (25 mL). The organic layer was dried (Na<sub>2</sub>SO<sub>4</sub>), filtered through a pad of silica gel, and the solvent was evaporated to yield the product **2a**.

Substrates **2b-2k** were also synthesized according to the above method.

## 2.2 Optimization of the reaction condition

To a 10 mL vial equipped with a small magnetic stir bar was added 1*H*-indole (**1a**) (0.5 mmol), 1-phenyl-2-(phenylamino)ethanone (**2a**) (0.5 mmol), iron catalysis as indicated, solvent (3mL) and oxidant (1 equiv) successively. The mixture was stirred for 10h-12h at room temperature or 40 °C, 60°C under air atmosphere. After the reaction was completed as indicated via TLC analysis, the reaction mixture was poured into water and extracted with EtOAc. The organic layer was separated and the solvent was evaporated under vacuum. The residue was purified via column chromatography over silica gel eluting with EtOAc/PE to give the desired coupling product **3a**.

## 2.3 $\alpha$ -Arylation of amino carbonyl compounds via Fe(ClO<sub>4</sub>)<sub>3</sub> catalysis

To a 10 mL vial equipped with a small magnetic stir bar was added indole (**1**) (0.5 mmol),  $\alpha$ -amino carbonyl compound (**2**) (0.5 mmol), Fe(ClO<sub>4</sub>)<sub>3</sub> (10 mmol%), CH<sub>3</sub>CN (3mL) and TBHP (1 equiv) successively. The mixture was stirred for 10h-12h at room temperature under air atmosphere. After the reaction was completed as indicated via TLC analysis, the reaction mixture was poured into water and extracted with EtOAc. The organic layer was separated and the solvent was evaporated under vacuum. The residue was purified via column chromatography over silica gel eluting with EtOAc/PE to give the desired coupling product **3**.

## 2.4 Mechanistic experiments

### (1) Control experiment 1

To a 10 mL vial equipped with a small magnetic stir bar was added 1*H*-indole (**1a**) (0.5 mmol), 1-phenyl-2-(phenylamino)ethanone (**2a**) (0.5 mmol), 2,2,6,6-tetramethylpiperidinoxy (TEMPO) (2 equiv), Fe(ClO<sub>4</sub>)<sub>3</sub> (10 mmol%), CH<sub>3</sub>CN (3mL) and TBHP (1 equiv) successively. The mixture was stirred for 10h at room temperature under air atmosphere. The reaction mixture was poured into water and extracted with EtOAc. The organic layer was separated and the solvent was evaporated under vacuum. The residue was purified via column chromatography over silica gel eluting with EtOAc/PE to give the desired coupling product **3a**.

### (2) Control experiment 2

To a 10 mL vial equipped with a small magnetic stir bar was added 1*H*-indole (**1a**) (0.5 mmol), 2-(methyl(phenyl)amino)-1-phenylethanone (**2g**) (0.5 mmol), Fe(ClO<sub>4</sub>)<sub>3</sub> (10 mmol%), CH<sub>3</sub>CN (3mL) and TBHP (1 equiv) successively. The mixture was stirred for 10h at room temperature under air atmosphere. The reaction mixture was poured into water and extracted with EtOAc. The organic layer was separated and the solvent was evaporated under vacuum. The residue was purified via column chromatography over silica gel eluting with EtOAc/PE.

### (3) Control experiment 3

To a 10 mL vial equipped with a small magnetic stir bar was added 1-(*p*-tolyl)-2-(*o*-tolylamino) ethanone (**2e**) (0.5 mmol), Fe(ClO<sub>4</sub>)<sub>3</sub> (10 mmol%), CH<sub>3</sub>CN (3mL) and TBHP (1 equiv) successively. The mixture was stirred at room temperature under air atmosphere. The in situ LC-MS analysis of the resulting mixture was conducted 6 hours later with gradient elution.

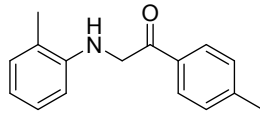

**2e**

M = 239 (t = 9.56 min)

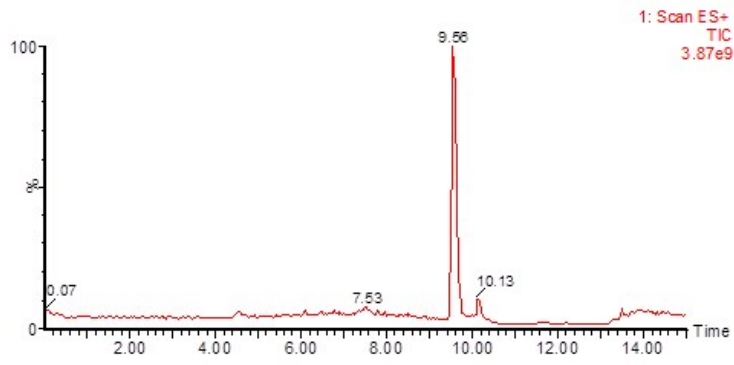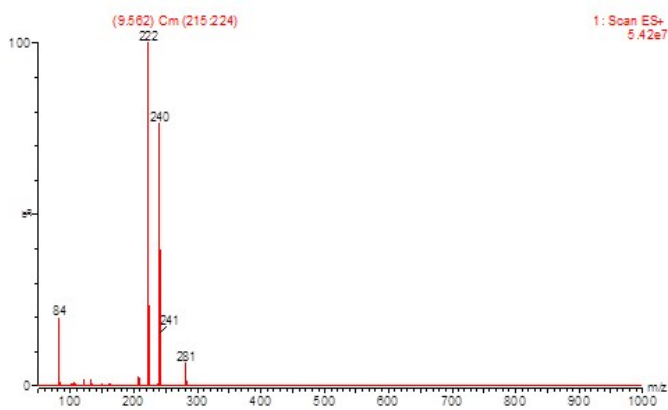

6 hours later

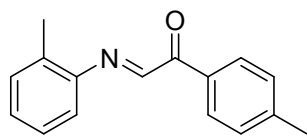

M = 237 (t = 10.21 min)

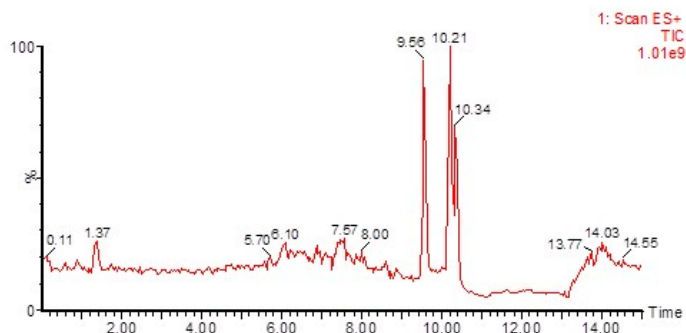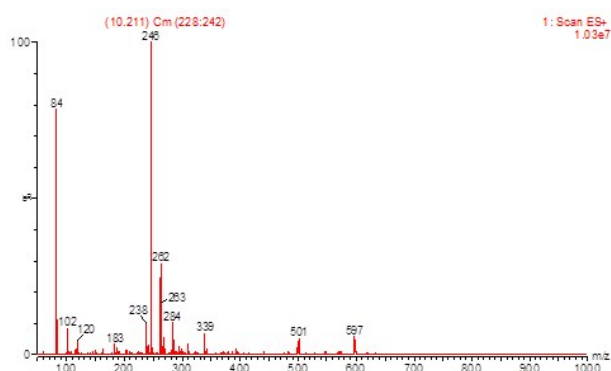

#### (4) Control experiment 4

1-(*p*-tolyl)-2-(*o*-tolylimino)ethanone (**4a**) was synthesized according to literature procedures S4.

To a 10 mL vial equipped with a small magnetic stir bar was added 1*H*-indole (**1a**) (0.5 mmol), 1-(*p*-tolyl)-2-(*o*-tolylimino)ethanone (**4a**) (0.5 mmol), CH<sub>3</sub>CN (3mL) successively. The mixture was stirred for 10h at room temperature under air atmosphere. The reaction mixture was poured into water and extracted with EtOAc. The organic layer was separated and the solvent was evaporated under vacuum. The residue was purified via column chromatography over silica gel eluting with EtOAc/PE to give the desired coupling product **3a**.

### 3. Characterizations of products

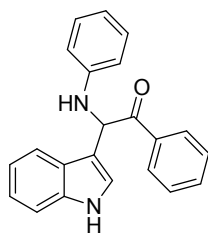

#### 2-(1*H*-indol-3-yl)-1-phenyl-2-(phenylamino)ethanone <sup>S5</sup> (3a)

Following the general procedure for 10h. The product was purified on silica gel (PE/EA = 2:1) and the title compound was obtained in 62% yield (101 mg) as yellow oil. <sup>1</sup>H NMR (400 MHz, CDCl<sub>3</sub>) δ (ppm) 10.94 (s, 1H, NH), 8.09 (d, 2H, *J* = 4Hz, ArH), 7.58-7.56 (m, 2H, ArH), 7.50-7.46 (m, 4H, ArH), 7.36-7.34 (m, 1H, ArH), 7.09-7.06 (m, 4H, ArH), 6.97-6.95 (m, 1H, ArH), 6.51-6.49 (m, 2H, ArH), 6.28 (s, 1H, CH), 5.04 (s, 1H, NH); <sup>13</sup>C NMR (100 MHz, CDCl<sub>3</sub>) δ (ppm) 199.0, 147.8, 137.2, 136.7, 133.3, 130.0, 129.1, 129.0, 126.9, 126.8, 124.4, 121.6, 119.2, 119.0, 114.5, 114.3, 113.2, 112.0, 49.2; ESI-HRMS: calcd. for C<sub>22</sub>H<sub>18</sub>N<sub>2</sub>O+H 327.1419, found 327. 1420.

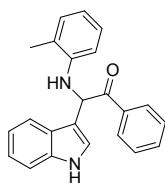

#### 2-(1*H*-indol-3-yl)-1-phenyl-2-(*o*-tolylamino)ethanone <sup>S5</sup> (3b)

Following the general procedure for 10h. The product was purified on silica gel (PE/EA = 2:1) and the title compound was obtained in 70% yield (119 mg) as yellow oil. <sup>1</sup>H NMR (400 MHz, CDCl<sub>3</sub>) δ (ppm) 10.94 (s, 1H, NH), 8.13-8.11 (m, 1H, ArH), 7.58-7.56 (m, 2H, ArH), 7.50-7.47 (m, 3H, ArH), 7.38-7.36 (m, 1H, ArH), 7.10-7.07 (m, 2H, ArH), 7.00-6.96 (m, 3H, ArH), 6.56-6.54 (m, 1H, ArH), 6.28 (s, 1H, CH), 4.75 (s, 1H, NH), 2.02 (s, 3H, CH<sub>3</sub>); <sup>13</sup>C NMR (100 MHz, CDCl<sub>3</sub>) δ (ppm) 199.2, 145.7, 137.3, 136.7, 133.3, 131.0, 129.1, 129.0, 127.6, 127.0, 124.4, 121.6, 121.4, 119.2, 119.0, 114.6, 114.3, 112.0, 49.3, 18.1; ESI-HRMS: calcd. for C<sub>23</sub>H<sub>20</sub>N<sub>2</sub>O+H 341.1576, found 341.1572.

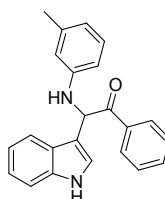

#### 2-(1*H*-indol-3-yl)-1-phenyl-2-(*m*-tolylamino)ethanone <sup>S5</sup> (3c)

Following the general procedure for 11h. The product was purified on silica gel (PE/EA = 2:1)

and the title compound was obtained in 83% yield (141 mg) as yellow oil. <sup>1</sup>H NMR (400 MHz, CDCl<sub>3</sub>) δ (ppm) 10.99 (s, 1H, NH), 8.04-8.02 (m, 2H, ArH), 7.49-7.37 (m, 6H, ArH), 7.10-7.09 (m, 1H, ArH), 6.96-6.93 (m, 2H, ArH), 6.67-6.64 (m, 1H, ArH), 6.46-6.45 (m, 1H, ArH), 6.38-6.35 (m, 1H, ArH), 6.32 (s, 1H, CH), 6.30-6.27 (m, 2H, ArH), 4.88 (s, 1H, NH), 2.20 (s, 3H, CH<sub>3</sub>); <sup>13</sup>C NMR (100 MHz, CDCl<sub>3</sub>) δ (ppm) 199.3, 147.6, 137.4, 137.0, 136.4, 133.2, 129.6, 129.2, 128.7, 127.1, 125.7, 125.3, 121.6, 119.3, 119.1, 116.6, 112.9, 112.0, 111.9, 47.0, 20.2; ESI-HRMS: calcd. for C<sub>23</sub>H<sub>20</sub>N<sub>2</sub>O+H 341.1576, found 341.1570.

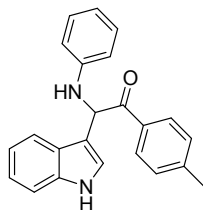

### 2-(1*H*-indol-3-yl)-2-(phenylamino)-1-(*p*-tolyl)ethanone <sup>SS</sup> (3d)

Following the general procedure for 10h. The product was purified on silica gel (PE/EA = 2:1) and the title compound was obtained in 43% yield (73 mg) as yellow oil. <sup>1</sup>H NMR (400 MHz, CDCl<sub>3</sub>) (ppm) 10.91 (s, 1H, NH), 8.01-7.99 (m, 2H, ArH), 7.47-7.45 (m, 1H, ArH), 7.35-7.27 (m, 3H, ArH), 7.10-7.04 (m, 4H, ArH), 6.96-6.92 (m, 2H, ArH), 6.49-6.47 (m, 2H, ArH), 6.23 (s, 1H, CH), 4.95 (s, 1H, NH), 2.33 (s, 3H, CH<sub>3</sub>); <sup>13</sup>C NMR (100 MHz, CDCl<sub>3</sub>) (ppm) 198.6, 147.7, 143.7, 136.7, 134.7, 130.0, 129.7, 129.1, 126.9, 124.4, 121.6, 119.2, 118.9, 114.6, 114.3, 111.9, 49.1, 21.5; ESI-HRMS: calcd. for C<sub>23</sub>H<sub>20</sub>N<sub>2</sub>O+H 341.1576, found 341.1572.

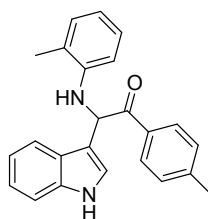

### 2-(1*H*-indol-3-yl)-1-(*p*-tolyl)-2-(*o*-tolylamino)ethanone (3e)

Following the general procedure for 12h. The product was purified on silica gel (PE/EA = 5:1) and the title compound was obtained in 41% yield (73 mg) as yellow oil. <sup>1</sup>H NMR (400 MHz, CDCl<sub>3</sub>) δ (ppm) 10.90 (s, 1H, NH), 8.01-7.99 (m, 2H, ArH), 7.47-7.27 (m, 5H, ArH), 7.06-6.94 (m, 5H, ArH), 6.53-6.51 (m, 1H, ArH), 6.22 (s, 1H, CH), 4.73 (s, 1H, NH), 2.34 (s, 3H, CH<sub>3</sub>), 2.00 (s, 3H, CH<sub>3</sub>); <sup>13</sup>C NMR (100 MHz, CDCl<sub>3</sub>) δ (ppm) 198.5, 145.7, 143.6, 136.7, 134.7, 130.9, 129.7, 129.1, 127.5, 127.0, 124.4, 121.4, 121.3, 119.2, 118.9, 114.7, 114.3, 111.9, 49.1, 18.0, 14.6; ESI-HRMS: calcd. for C<sub>24</sub>H<sub>22</sub>N<sub>2</sub>O+H 355.1732, found 355.1735.



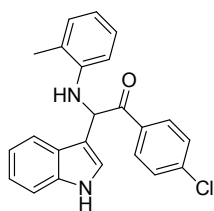

**1-(4-chlorophenyl)-2-(1*H*-indol-3-yl)-2-(*o*-tolylamino)ethanone (3f)**

Following the general procedure for 10h. The product was purified on silica gel (PE/EA = 5:1) and the title compound was obtained in 35% yield (65 mg) as yellow oil. <sup>1</sup>H NMR (400 MHz, CDCl<sub>3</sub>) δ (ppm) 10.93 (s, 1H, NH), 8.11-8.08 (m, 2H, ArH), 7.55-7.53 (m, 2H, ArH), 7.47-7.45 (m, 1H, ArH), 7.35-7.33 (m, 1H, ArH), 7.06-7.03 (m, 3H, ArH), 6.95-6.93 (m, 3H, ArH), 6.53-6.51 (m, 1H, ArH), 6.23 (s, 1H, CH), 4.79 (s, 1H, NH), 2.00 (s, 3H, CH<sub>3</sub>); <sup>13</sup>C NMR (100 MHz, CDCl<sub>3</sub>) δ (ppm) 198.0, 145.7, 138.2, 136.7, 135.9, 132.2, 130.9, 130.0, 129.2, 127.5, 126.9, 124.5, 121.6, 121.5, 119.2, 119.0, 114.9, 114.4, 114.3, 112.0, 49.4, 18.0; ESI-HRMS: calcd. for C<sub>23</sub>H<sub>19</sub>ClN<sub>2</sub>O+H 375.1186, found 375.1190.

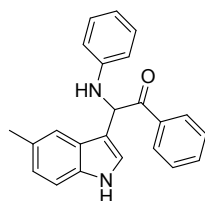

**2-(5-methyl-1*H*-indol-3-yl)-1-phenyl-2-(phenylamino)ethanone (3g)**

Following the general procedure for 10h. The product was purified on silica gel (PE/EA = 5:1) and the title compound was obtained in 32% yield (54 mg) as yellow oil. <sup>1</sup>H NMR (400 MHz, CDCl<sub>3</sub>) δ (ppm) 10.80 (s, 1H, NH), 8.09 (d, 2H, *J* = 8 Hz, ArH), 7.59-7.56 (m, 1H, ArH), 7.50-7.46 (m, 3H, ArH), 7.27-7.22 (m, 2H, ArH), 7.05-6.89 (m, 4H, ArH), 6.49 (d, 2H, *J* = 8 Hz, ArH), 6.23 (s, 1H, CH), 4.98 (s, 1H, NH), 2.34 (s, 3H, CH<sub>3</sub>); <sup>13</sup>C NMR (100 MHz, CDCl<sub>3</sub>) δ (ppm) 199.0, 147.7, 137.2, 135.1, 133.3, 130.0, 129.1, 129.0, 127.4, 127.1, 126.9, 124.5, 123.2, 118.6, 114.3, 113.8, 111.7, 49.2, 29.5; ESI-HRMS: calcd. for C<sub>23</sub>H<sub>20</sub>N<sub>2</sub>O+H 341.1576, found 341.1575.

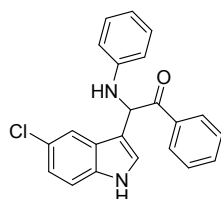

**2-(5-chloro-1*H*-indol-3-yl)-1-phenyl-2-(phenylamino)ethanone (3h)**

Following the general procedure for 10h. The product was purified on silica gel (PE/EA = 5:1) and the title compound was obtained in 48% yield (86 mg) as yellow oil. <sup>1</sup>H NMR (400 MHz, CDCl<sub>3</sub>) δ (ppm) 11.15 (s, 1H, NH), 8.12 (d, 2H, *J* = 8Hz, ArH), 7.59-7.47 (m, 5H, ArH), 7.38-7.36 (m, 1H, ArH), 7.19-7.18 (m, 1H, ArH), 7.08-7.04 (m, 3H, ArH), 6.49 (d, 2H, *J* = 8

Hz, ArH), 6.31 (s, 1H, CH), 5.02 (s, 1H, CH);  $^{13}\text{C}$  NMR (100 MHz,  $\text{CDCl}_3$ )  $\delta$  (ppm) 198.9, 147.8, 137.0, 135.1, 133.4, 129.9, 129.1, 128.1, 126.6, 126.3, 123.7, 121.5, 118.5, 114.4, 114.3, 113.5, 48.9; ESI-HRMS: calcd. for  $\text{C}_{22}\text{H}_{17}\text{ClN}_2\text{O}+\text{H}$  361.1029, found 361.1030.

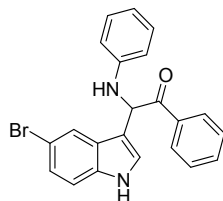

### 2-(5-bromo-1H-indol-3-yl)-1-phenyl-2-(phenylamino)ethanone (3i)

Following the general procedure for 10h. The product was purified on silica gel (PE/EA = 2:1) and the title compound was obtained in 47% yield (95 mg) as yellow oil.  $^1\text{H}$  NMR (400 MHz,  $\text{CDCl}_3$ ) (ppm) 11.7 (s, 1H, NH), 8.13-8.11 (m, 2H, ArH), 7.69-7.68 (m, 1H, ArH), 7.62-7.59 (m, 1H, ArH), 7.51-7.49 (m, 1H, ArH), 7.34-7.32 (m, 3H, ArH), 7.19-7.16 (m, 2H, ArH), 7.06-7.04 (m, 2H, ArH), 6.51-6.48 (m, 2H, ArH), 6.32 (s, 1H, CH), 4.99 (s, 1H, NH);  $^{13}\text{C}$  NMR (100 MHz,  $\text{CDCl}_3$ ) (ppm) 198.9, 147.9, 137.0, 135.4, 133.4, 130.0, 129.1, 128.8, 126.6, 126.1, 124.0, 121.6, 114.3, 114.2, 114.0, 111.7, 48.8; ESI-HRMS: calcd. for  $\text{C}_{22}\text{H}_{17}\text{BrN}_2\text{O}+\text{H}$  405.0524, found 405.0528.

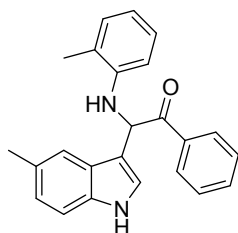

### 2-(5-methyl-1H-indol-3-yl)-1-phenyl-2-(o-tolylamino)ethanone (3j)

Following the general procedure for 12h. The product was purified on silica gel (PE/EA = 5:1) and the title compound was obtained in 41% yield (73 mg) as yellow oil.  $^1\text{H}$  NMR (400 MHz,  $\text{CDCl}_3$ )  $\delta$  (ppm) 10.79 (s, 1H, NH), 8.10-8.07 (m, 2H, ArH), 7.58-7.46 (m, 4H, ArH), 7.26-7.22 (m, 2H, ArH), 6.97-6.91 (m, 4H, ArH), 6.54-6.52 (m, 1H, ArH), 6.21 (s, 1H, CH), 4.73 (s, 1H, NH), 2.34 (s, 3H,  $\text{CH}_3$ ), 2.00 (s, 3H,  $\text{CH}_3$ );  $^{13}\text{C}$  NMR (100 MHz,  $\text{CDCl}_3$ )  $\delta$  (ppm) 199.0, 145.7, 137.3, 135.1, 133.3, 130.9, 129.1, 129.0, 127.5, 127.3, 127.2, 127.1, 124.5, 123.2, 121.3, 118.6, 114.3, 113.9, 111.7, 49.2, 21.8, 18.0; ESI-HRMS: calcd. for  $\text{C}_{24}\text{H}_{22}\text{N}_2\text{O}+\text{H}$  355.1732, found 355.1728.

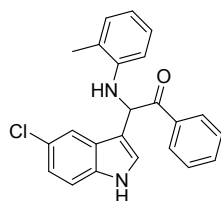

### 2-(5-chloro-1H-indol-3-yl)-1-phenyl-2-(o-tolylamino)ethanone (3k)

Following the general procedure for 10h. The product was purified on silica gel (PE/EA = 5:1)

and the title compound was obtained in 62% yield (116 mg) as yellow oil. <sup>1</sup>H NMR (400 MHz, CDCl<sub>3</sub>) δ (ppm) 11.15 (s, 1H, NH), 8.14-8.13 (m, 2H, ArH), 7.58-7.37 (m, 6H, ArH), 7.19-6.97 (m, 4H, ArH), 6.55-6.54 (m, 1H, ArH), 6.30 (s, 1H, CH), 4.76 (s, 1H, NH), 2.01 (s, 3H, CH<sub>3</sub>); <sup>13</sup>C NMR (100 MHz, CDCl<sub>3</sub>) δ (ppm) 198.9, 145.8, 137.1, 135.2, 133.4, 130.8, 129.1, 128.1, 127.5, 126.9, 126.3, 123.6, 121.5, 118.5, 114.5, 114.4, 113.5, 48.9, 18.1; ESI-HRMS: calcd. for C<sub>23</sub>H<sub>19</sub>ClN<sub>2</sub>O+H 375.1186, found 375.1185.

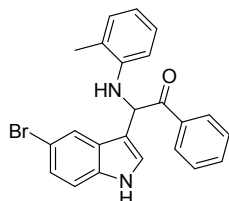

### 2-(5-bromo-1H-indol-3-yl)-1-phenyl-2-(*o*-tolylamino)ethanone (3l)

Following the general procedure for 10h. The product was purified on silica gel (PE/EA = 5:1) and the title compound was obtained in 64% yield (134 mg) as yellow oil. <sup>1</sup>H NMR (400 MHz, CDCl<sub>3</sub>) δ (ppm) 11.16 (s, 1H, NH), 8.14-8.13 (m, 2H, ArH), 7.70 (s, 1H, ArH), 7.58-7.47 (m, 5H, ArH), 7.35-7.33 (m, 2H, ArH), 7.20-7.17 (m, 2H, ArH), 6.56-6.54 (m, 1H, ArH), 6.31 (s, 1H, CH), 4.76 (s, 1H, NH), 2.01 (s, 3H, CH<sub>3</sub>); <sup>13</sup>C NMR (100 MHz, CDCl<sub>3</sub>) δ (ppm) 198.9, 145.8, 137.1, 135.4, 133.4, 130.8, 129.1, 128.8, 127.5, 126.9, 126.2, 124.0, 121.6, 121.5, 114.4, 114.3, 114.0, 111.7, 48.9, 18.1; ESI-HRMS: calcd. for C<sub>23</sub>H<sub>10</sub>BrN<sub>2</sub>O+H 419.0681, found 419.0680.

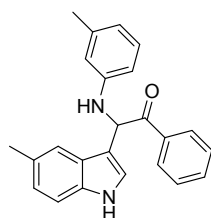

### 2-(5-methyl-1H-indol-3-yl)-1-phenyl-2-(*m*-tolylamino)ethanone (3m)

Following the general procedure for 10h. The product was purified on silica gel (PE/EA = 5:1) and the title compound was obtained in 61% yield (108 mg) as yellow oil. <sup>1</sup>H NMR (400 MHz, CDCl<sub>3</sub>) δ (ppm) 10.81(s, 1H, NH), 8.05-8.02 (m, 2H, ArH), 7.58-7.56 (m, 1H, ArH), 7.51-7.47 (m, 3H, ArH), 7.29-7.25 (m, 2H, ArH), 6.95-6.94 (m, 1H, ArH), 6.87-6.86 (m, 1H, ArH), 6.64-6.61 (m, 1H, ArH), 6.47-6.46 (m, 1H, ArH), 6.32 (s, 1H, CH), 6.30-6.28 (m, 1H, ArH), 2.36 (s, 3H, CH<sub>3</sub>), 2.20 (s, 3H, CH<sub>3</sub>); <sup>13</sup>C NMR (100 MHz, CDCl<sub>3</sub>) δ (ppm) 199.3, 147.6, 137.4, 136.3, 135.4, 133.2, 129.6, 129.2, 128.7, 127.5, 127.3, 125.8, 125.4, 123.3, 118.7, 116.5, 112.2, 111.8, 111.7, 47.0, 21.8, 20.2; ESI-HRMS: calcd. for C<sub>24</sub>H<sub>22</sub>N<sub>2</sub>O+H 355.1732, found 355.1730.

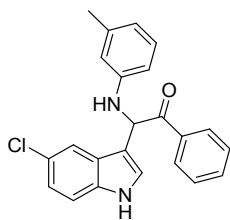

**2-(5-chloro-1H-indol-3-yl)-1-phenyl-2-(*m*-tolylamino)ethanone (3n)**

Following the general procedure for 10h. The product was purified on silica gel (PE/EA = 5:1) and the title compound was obtained in 56% yield (105 mg) as yellow oil. <sup>1</sup>H NMR (400 MHz, CDCl<sub>3</sub>) δ (ppm) 11.20 (s, 1H, NH), 8.06-8.04 (m, 2H, ArH), 7.57-7.50 (m, 1H, ArH), 7.48-7.46 (m, 4H, ArH), 7.42-7.40 (m, 1H, ArH), 7.11-7.10 (m, 1H, ArH), 7.02-7.01 (m, 1H, ArH), 6.62-6.60 (m, 1H, ArH), 6.48-6.47 (m, 1H, ArH), 6.36 (s, 1H, CH), 6.32-6.29 (m, 1H, ArH), 2.21 (s, 3H, CH<sub>3</sub>); <sup>13</sup>C NMR (100 MHz, CDCl<sub>3</sub>) δ (ppm) 199.3, 147.6, 137.2, 136.5, 135.5, 133.3, 129.4, 129.2, 128.9, 128.3, 127.2, 125.5, 123.7, 121.5, 118.8, 116.7, 113.6, 112.8, 112.0, 47.0, 20.2; ESI-HRMS: calcd. for C<sub>23</sub>H<sub>19</sub>ClN<sub>2</sub>O+H 375.1186, found 375.1182.

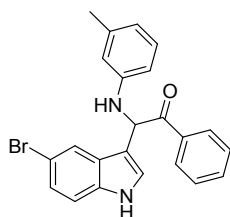

**2-(5-bromo-1H-indol-3-yl)-1-phenyl-2-(*m*-tolylamino)ethanone (3o)**

Following the general procedure for 12h. The product was purified on silica gel (PE/EA = 5:1) and the title compound was obtained in 57% yield (119 mg) as yellow oil. <sup>1</sup>H NMR (400 MHz, CDCl<sub>3</sub>) δ (ppm) 11.20 (s, 1H, NH), 8.04-8.03 (m, 2H, ArH), 7.63 (s, 1H, ArH), 7.57-7.55 (m, 4H, ArH), 7.49-7.46 (m, 1H, ArH), 7.36-7.34 (m, 1H, ArH), 6.97 (s, 1H, ArH), 6.59-6.57 (m, 1H, ArH), 6.45 (s, 1H, ArH), 6.34 (s, 1H, CH), 6.29-6.28 (m, 1H, ArH), 4.93 (s, 1H, NH), 2.19 (s, 3H, CH<sub>3</sub>); <sup>13</sup>C NMR (100 MHz, CDCl<sub>3</sub>) δ (ppm) 199.3, 147.8, 137.2, 136.5, 133.3, 129.4, 129.2, 129.0, 128.9, 127.0, 125.4, 124.0, 121.8, 116.7, 114.1, 112.8, 111.9, 111.7, 47.0, 20.2; ESI-HRMS: calcd. for C<sub>23</sub>H<sub>19</sub>BrN<sub>2</sub>O+H 419.0681, found 419.0680.

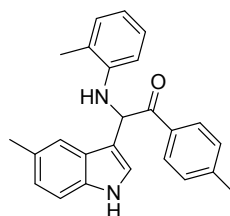

**2-(5-methyl-1H-indol-3-yl)-1-(*p*-tolyl)-2-(*o*-tolylamino)ethanone (3p)**

Following the general procedure for 10h. The product was purified on silica gel (PE/EA = 5:1) and the title compound was obtained in 46% yield (85 mg) as yellow oil. <sup>1</sup>H NMR (400 MHz,

CDCl<sub>3</sub>)  $\delta$  (ppm) 10.77 (s, 1H, NH), 8.00-7.98 (m, 2H, ArH), 7.29-7.22 (m, 5H, ArH), 6.96-6.90 (m, 4H, ArH), 6.53-6.51 (m, 1H, ArH), 6.17 (s, 1H, CH), 4.76 (s, 1H, NH), 2.33 (s, 6H, 2CH<sub>3</sub>), 2.00 (s, 3H, CH<sub>3</sub>); <sup>13</sup>C NMR (100 MHz, CDCl<sub>3</sub>)  $\delta$  (ppm) 198.5, 145.6, 143.6, 135.1, 134.7, 130.9, 130.0, 129.1, 127.5, 127.3, 127.2, 124.5, 123.2, 121.3, 118.6, 114.3, 114.0, 111.6, 49.1, 21.8, 21.5, 18.0; ESI-HRMS: calcd. for C<sub>25</sub>H<sub>24</sub>N<sub>2</sub>O+H 369.1889, found 369.1886.

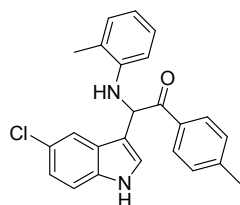

### 2-(5-chloro-1H-indol-3-yl)-1-(p-tolyl)-2-(o-tolylamino)ethanone (3q)

Following the general procedure for 10h. The product was purified on silica gel (PE/EA = 5:1) and the title compound was obtained in 82% yield (159 mg) as yellow oil. <sup>1</sup>H NMR (400 MHz, CDCl<sub>3</sub>)  $\delta$  (ppm) 11.14 (s, 1H, NH), 8.05-8.03 (m, 2H, ArH), 7.55-7.54 (m, 2H, ArH), 7.39-7.28 (m, 4H, ArH), 7.19-7.18 (m, 1H, ArH), 7.09-6.97 (m, 3H, ArH), 6.55-6.53 (m, 1H, ArH), 6.27 (s, 1H, CH), 4.79 (s, 1H, NH), 2.33 (s, 3H, CH<sub>3</sub>), 2.01 (s, 3H, CH<sub>3</sub>); <sup>13</sup>C NMR (100 MHz, CDCl<sub>3</sub>)  $\delta$  (ppm) 198.4, 145.7, 143.8, 135.2, 134.5, 130.8, 129.7, 129.3, 128.2, 127.4, 127.1, 126.3, 123.6, 121.5, 118.5, 114.6, 114.4, 113.4, 48.8, 21.5, 18.1; ESI-HRMS: calcd. for C<sub>24</sub>H<sub>21</sub>ClN<sub>2</sub>O+H 389.1342, found 389.1340.

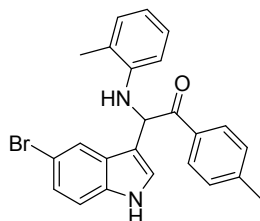

### 2-(5-bromo-1H-indol-3-yl)-1-(p-tolyl)-2-(o-tolylamino)ethanone (3r)

Following the general procedure for 10h. The product was purified on silica gel (PE/EA = 5:1) and the title compound was obtained in 69% yield (149 mg) as yellow oil. <sup>1</sup>H NMR (400 MHz, CDCl<sub>3</sub>)  $\delta$  (ppm) 11.15 (s, 1H, NH), 8.05-8.03 (m, 2H, ArH), 7.68 (s, 1H, ArH), 7.34-7.16 (m, 6H, ArH), 6.95-6.93 (m, 2H, ArH), 6.54-6.52 (m, 1H, ArH), 6.26 (s, 1H, CH), 4.81 (s, 1H, CH), 2.34 (s, 3H, CH<sub>3</sub>), 2.00 (s, 3H, CH<sub>3</sub>); <sup>13</sup>C NMR (100 MHz, CDCl<sub>3</sub>)  $\delta$  (ppm) 198.4, 145.7, 143.8, 135.4, 134.5, 130.8, 129.7, 129.3, 128.9, 127.4, 127.0, 124.0, 121.6, 121.5, 114.5, 114.4, 114.0, 111.6, 48.7, 21.56, 18.1; ESI-HRMS: calcd. for C<sub>24</sub>H<sub>21</sub>BrN<sub>2</sub>O+H 433.0837, found 433.0835.

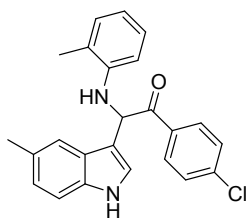

### 1-(4-chlorophenyl)-2-(5-methyl-1H-indol-3-yl)-2-(*o*-tolylamino)ethanone (3s)

Following the general procedure for 10h. The product was purified on silica gel (PE/EA = 5:1) and the title compound was obtained in 35% yield (68 mg) as yellow oil. <sup>1</sup>H NMR (400 MHz, CDCl<sub>3</sub>) δ (ppm) 10.80 (s, 1H, NH), 8.09-8.07 (m, 2H, ArH), 7.55-7.53 (m, 2H, ArH), 7.25-7.22 (m, 3H, ArH), 6.96-6.91 (m, 3H, ArH), 6.53-6.51 (m, 1H, ArH), 6.26 (s, 1H, CH), 4.95 (s, 1H, NH), 2.33 (s, 3H, CH<sub>3</sub>), 2.00 (s, 3H, CH<sub>3</sub>); <sup>13</sup>C NMR (100 MHz, CDCl<sub>3</sub>) δ (ppm) 198.0, 145.7, 138.2, 135.9, 135.2, 130.9, 129.2, 127.5, 127.4, 127.1, 126.9, 124.6, 123.3, 121.4, 118.6, 114.4, 113.6, 111.7, 49.4, 21.8, 18.0; ESI-HRMS: calcd. for C<sub>24</sub>H<sub>21</sub>ClN<sub>2</sub>O+H 389.1342, found 389.1338.

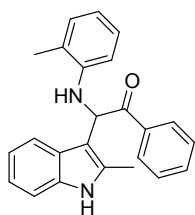

### 2-(2-methyl-1H-indol-3-yl)-1-phenyl-2-(*o*-tolylamino)ethanone (3t)

Following the general procedure for 10h. The product was purified on silica gel (PE/EA = 5:1) and the title compound was obtained in 58% yield (103 mg) as yellow oil. <sup>1</sup>H NMR (400 MHz, CDCl<sub>3</sub>) δ (ppm) ;10.88 (s, 1H, NH), 7.96-7.94 (m, 2H, ArH), 7.50-7.36 (m, 5H, ArH), 7.20-7.18 (m, 1H, ArH), 6.94-6.80 (m, 4H, ArH), 6.49-6.47 (m, 1H, ArH), 6.14 (s, 1H, CH), 4.67 (s, 1H, NH), 2.29 (s, 3H, CH<sub>3</sub>), 1.97 (s, 3H, CH<sub>3</sub>); <sup>13</sup>C NMR (100 MHz, CDCl<sub>3</sub>) δ (ppm) 199.7, 145.3, 144.9, 137.7, 133.4, 131.2, 129.0, 128.6, 128.1, 127.7, 127.5, 121.0, 120.5, 119.0, 118.7, 117.2, 114.0, 112.9, 111.0, 110.6, 108.7, 49.6, 21.2, 18.1; ESI-HRMS: calcd. for C<sub>24</sub>H<sub>22</sub>N<sub>2</sub>O+H 355.1732, found 355.1730.

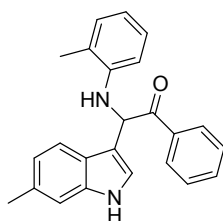

### 2-(6-methyl-1H-indol-3-yl)-1-phenyl-2-(*o*-tolylamino)ethanone (3u)

Following the general procedure for 10h. The product was purified on silica gel (PE/EA = 5:1) and the title compound was obtained in 36% yield (64 mg) as yellow oil. <sup>1</sup>H NMR (400 MHz,

CDCl<sub>3</sub>)  $\delta$  (ppm) 10.75 (s, 1H, NH), 8.08-8.07 (m, 2H, ArH), 7.57-7.55 (m, 1H, ArH), 7.49-7.45 (m, 3H, ArH), 7.35-7.33 (m, 1H, ArH), 7.12 (s, 1H, ArH), 6.94-6.93 (m, 3H, ArH), 6.79-6.77 (m, 1H, ArH), 6.52-6.50 (m, 1H, ArH), 6.20 (s, 1H, CH), 4.71 (s, 1H, NH), 2.35 (s, 3H, CH<sub>3</sub>), 1.99 (s, 3H, CH<sub>3</sub>); <sup>13</sup>C NMR (100 MHz, CDCl<sub>3</sub>)  $\delta$  (ppm) 198.4, 137.2, 137.1, 133.2, 130.5, 129.1, 129.0, 125.0, 124.9, 124.2, 120.7, 119.2, 113.3, 111.7, 42.3, 21.8, 18.3; ESI-HRMS: calcd. for C<sub>24</sub>H<sub>22</sub>N<sub>2</sub>O+H 355.1732, found 355.1730.

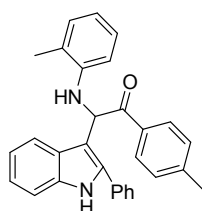

### 2-(2-phenyl-1H-indol-3-yl)-1-(p-tolyl)-2-(o-tolylamino)ethanone (3v)

Following the general procedure for 10h. The product was purified on silica gel (PE/EA = 5:1) and the title compound was obtained in 39% yield (84 mg) as yellow oil. <sup>1</sup>H NMR (400 MHz, CDCl<sub>3</sub>)  $\delta$  (ppm) 11.48 (s, 1H, NH), 7.57-7.43 (m, 7H, ArH), 7.36-7.28 (m, 3H, ArH), 7.05-7.03 (m, 3H, ArH), 6.93-6.74 (m, 3H, ArH), 6.55-6.53 (m, 1H, ArH), 6.06 (s, 1H, CH), 4.75 (s, 1H, NH), 2.22 (s, 3H, CH<sub>3</sub>), 2.00 (s, 3H, CH<sub>3</sub>); <sup>13</sup>C NMR (100 MHz, CDCl<sub>3</sub>)  $\delta$  (ppm) 198.4, 145.5, 143.4, 136.7, 131.1, 129.4, 129.3, 128.7, 128.6, 128.5, 127.6, 121.8, 121.3, 120.7, 119.6, 114.3, 111.9, 109.2, 50.4, 21.4, 18.2; ESI-HRMS: calcd. for C<sub>30</sub>H<sub>26</sub>N<sub>2</sub>O+H 431.2045, found 431.2050.

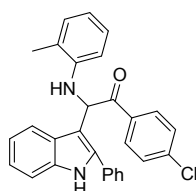

### 1-(4-chlorophenyl)-2-(2-phenyl-1H-indol-3-yl)-2-(o-tolylamino)ethanone (3w)

Following the general procedure for 10h. The product was purified on silica gel (PE/EA = 5:1) and the title compound was obtained in 56% yield (126 mg) as yellow oil. <sup>1</sup>H NMR (400 MHz, CDCl<sub>3</sub>)  $\delta$  (ppm) 11.50 (s, 1H, NH), 7.56-7.46 (m, 7H, ArH), 7.35-7.29 (m, 5H, ArH), 7.06-6.83 (m, 4H, ArH), 6.55-6.53 (m, 1H, ArH), 6.06 (s, 1H, CH), 2.00 (s, 3H, CH<sub>3</sub>); <sup>13</sup>C NMR (100 MHz, CDCl<sub>3</sub>)  $\delta$  (ppm) 197.8, 145.9, 138.4, 138.3, 135.7, 135.1, 131.0, 130.8, 129.2, 128.1, 127.4, 126.6, 126.3, 123.7, 121.5, 118.5, 114.4, 114.2, 113.5, 49.0, 18.0; ESI-HRMS: calcd. for C<sub>29</sub>H<sub>23</sub>ClN<sub>2</sub>O+H 451.1499, found 451.1495.

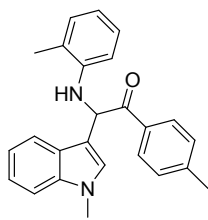

**2-(1-methyl-1H-indol-3-yl)-1-(*p*-tolyl)-2-(*o*-tolylamino)ethanone (3x)**

Following the general procedure for 10h. The product was purified on silica gel (PE/EA = 5:1) and the title compound was obtained in 34% yield (63 mg) as yellow oil. <sup>1</sup>H NMR (400 MHz, CDCl<sub>3</sub>) δ (ppm) 8.00-7.98 (m, 2H, ArH), 7.47-7.45 (m, 1H, ArH), 7.37-7.35 (m, 1H, ArH), 7.28-7.26 (m, 3H, ArH), 7.10-7.06 (m, 1H, ArH), 7.02 (s, 1H, ArH), 6.96-6.92 (m, 3H, ArH), 6.51-6.49 (m, 1H, ArH), 6.20 (s, 1H, CH), 4.71 (s, 1H, NH), 3.71 (s, 3H, CH<sub>3</sub>), 2.33 (s, 3H, CH<sub>3</sub>), 1.98 (s, 3H, CH<sub>3</sub>); <sup>13</sup>C NMR (100 MHz, CDCl<sub>3</sub>) δ (ppm) 198.4, 145.7, 143.7, 137.1, 134.6, 130.9, 129.7, 129.2, 128.7, 127.5, 127.3, 121.7, 121.4, 119.4, 119.0, 114.4, 114.1, 110.1, 48.9, 32.8, 21.6, 18.1; ESI-HRMS: calcd. for C<sub>25</sub>H<sub>24</sub>N<sub>2</sub>O+H 369.1889, found 369.1890.

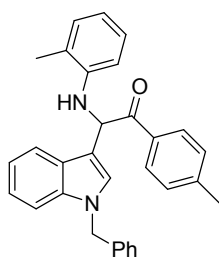

**2-(1-benzyl-1H-indol-3-yl)-1-(*p*-tolyl)-2-(*o*-tolylamino)ethanone (3y)**

Following the general procedure for 10h. The product was purified on silica gel (PE/EA = 5:1) and the title compound was obtained in 30% yield (67 mg) as yellow oil. <sup>1</sup>H NMR (400 MHz, CDCl<sub>3</sub>) δ (ppm) 8.02-8.00 (m, 2H, ArH), 7.50-7.48 (m, 1H, ArH), 7.38-7.36 (m, 2H, ArH), 7.32-7.22 (m, 4H, ArH), 7.11-7.05 (m, 4H, ArH), 6.97-6.95 (m, 3H, ArH), 6.53-6.51 (m, 1H, ArH), 6.25 (s, 1H, CH), 5.38 (s, 2H, CH<sub>2</sub>), 4.75 (s, 1H, NH), 2.35 (s, 3H, CH<sub>3</sub>), 1.99 (s, 3H, CH<sub>3</sub>); <sup>13</sup>C NMR (100 MHz, CDCl<sub>3</sub>) δ (ppm) 198.5, 145.7, 144.1, 143.7, 124.1, 138.9, 136.5, 134.6, 130.9, 129.8, 129.7, 129.6, 129.2, 128.9, 128.3, 127.7, 127.5, 127.3, 126.9, 121.8, 121.4, 119.5, 119.2, 114.7, 114.3, 110.6, 49.4, 49.0, 21.6, 18.1; ESI-HRMS: calcd. for C<sub>31</sub>H<sub>28</sub>N<sub>2</sub>O+H 445.2202, found 445.2206.



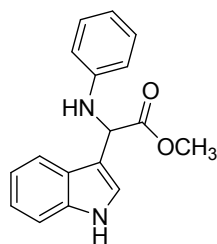

**Methyl 2-(1H-indol-3-yl)-2-(phenylamino) acetate (3z)**

Following the general procedure for 10h. The product was purified on silica gel (PE/EA = 5:1) and the title compound was obtained in 71% yield (99 mg) as yellow oil. <sup>1</sup>H NMR (400 MHz, CDCl<sub>3</sub>) δ (ppm) 10.98 (s, 1H, NH), 7.37-7.34 (m, 2H, ArH), 7.17-7.16 (m, 1H, ArH), 7.08-7.00 (m, 4H, ArH), 6.95-6.91 (m, 1H, ArH), 6.50-6.48 (m, 2H, ArH), 5.07 (s, 1H, CH), 5.00 (s, 1H, NH), 3.64 (s, 3H, CH<sub>3</sub>); <sup>13</sup>C NMR (100 MHz, CDCl<sub>3</sub>) δ (ppm) 174.0, 148.1, 136.7, 129.6, 126.7, 126.4, 123.8, 121.6, 119.1, 119.0, 114.1, 113.5, 111.9, 52.2, 47.8; ESI-HRMS: calcd. for C<sub>17</sub>H<sub>16</sub>N<sub>2</sub>O<sub>2</sub>+H 281.1212, found 281.1213.

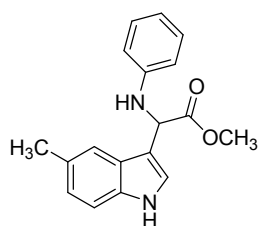

**methyl 2-(5-methyl-1H-indol-3-yl)-2-(phenylamino)acetate (3aa)**

Following the general procedure for 10h. The product was purified on silica gel (PE/EA = 5:1) and the title compound was obtained in 67% yield (98 mg) as yellow oil. <sup>1</sup>H NMR (400 MHz, CDCl<sub>3</sub>) δ (ppm) 10.85 (s, 1H, NH), 7.24-7.22 (m, 1H, ArH), 7.18-7.10 (m, 2H, ArH), 7.02-7.00 (m, 3H, ArH), 6.91-6.88 (m, 1H, ArH), 6.50-6.48 (m, 2H, ArH), 5.02 (s, 1H, CH), 5.00 (s, 1H, NH), 3.63 (s, 3H, CH<sub>3</sub>), 2.32 (s, 3H, CH<sub>3</sub>); <sup>13</sup>C NMR (100 MHz, CDCl<sub>3</sub>) δ (ppm) 174.0, 148.0, 135.0, 129.2, 127.4, 127.0, 126.4, 123.9, 123.2, 118.5, 114.1, 112.9, 111.7, 52.2, 47.7, 21.8; ESI-HRMS: calcd. for C<sub>18</sub>H<sub>18</sub>N<sub>2</sub>O<sub>2</sub>+H 295.1368, found 295.1365

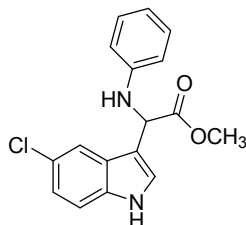

**methyl 2-(5-chloro-1H-indol-3-yl)-2-(phenylamino)acetate (3bb)**

Following the general procedure for 10h. The product was purified on silica gel (PE/EA = 5:1) and the title compound was obtained in 63% yield (99 mg) as yellow oil. <sup>1</sup>H NMR (400 MHz, CDCl<sub>3</sub>) δ (ppm) 11.21 (s, 1H, NH), 7.43-7.29 (m, 4H, ArH), 7.08-7.00 (m, 3H, ArH), 6.51-

6.49 (m, 2H, ArH), 5.10 (s, 1H, CH), 5.02 (s, 1H, NH), 3.65 (s, 3H, CH<sub>3</sub>); <sup>13</sup>C NMR (100 MHz, CDCl<sub>3</sub>) δ (ppm) 173.8, 148.1, 135.2, 129.2, 127.8, 126.2, 125.8, 123.6, 121.6, 118.5, 114.2, 113.5, 113.4, 52.3, 47.4; ESI-HRMS: calcd. for C<sub>17</sub>H<sub>15</sub>ClN<sub>2</sub>O<sub>2</sub>+H 315.0822, found 315.0823.

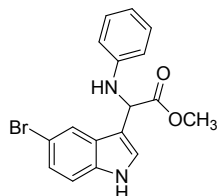

**methyl 2-(5-bromo-1H-indol-3-yl)-2-(phenylamino)acetate (3cc)**

Following the general procedure for 10h. The product was purified on silica gel (PE/EA = 5:1) and the title compound was obtained in 59% yield (106 mg) as yellow oil. <sup>1</sup>H NMR (400 MHz, CDCl<sub>3</sub>) δ (ppm) 11.22 (s, 1H, NH), 7.53-7.52 (m, 1H, ArH), 7.35-7.16 (m, 4H, ArH), 7.02-7.00 (m, 2H, ArH), 6.51-6.49 (m, 2H, ArH), 5.10 (s, 1H, CH), 5.02 (s, 1H, NH), 3.65 (s, 3H, CH<sub>3</sub>); <sup>13</sup>C NMR (100 MHz, CDCl<sub>3</sub>) δ (ppm) 173.8, 148.1, 135.4, 129.2, 128.5, 126.1, 125.6, 124.1, 121.2, 114.2, 114.0, 113.3, 111.7, 52.3, 47.4; ESI-HRMS: calcd. for C<sub>17</sub>H<sub>15</sub>BrN<sub>2</sub>O<sub>2</sub>+H 359.0317, found 359.0320.

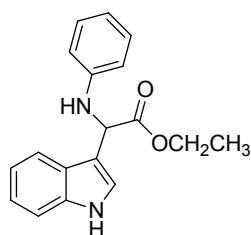

**ethyl 2-(1H-indol-3-yl)-2-(phenylamino)acetate (3dd)**

Following the general procedure for 10h. The product was purified on silica gel (PE/EA = 5:1) and the title compound was obtained in 68% yield (100 mg) as yellow oil. <sup>1</sup>H NMR (400 MHz, CDCl<sub>3</sub>) δ (ppm) 11.01(s, 1H, NH), 7.43-7.28 (m, 2H, ArH), 7.20-7.19 (m, 1H, ArH), 7.10-6.96 (m, 5H, ArH), 6.54-6.52 (m, 2H, ArH), 5.07 (s, 1H, CH), 5.04 (s, 1H, NH), 4.19-4.11(m, 2H, CH<sub>2</sub>), 1.23-1.20 (m, 3H, CH<sub>3</sub>); <sup>13</sup>C NMR (100 MHz, CDCl<sub>3</sub>) δ (ppm) 173.4, 148.0, 136.7, 129.2, 126.8, 126.5, 123.7, 121.6, 119.1, 119.0, 114.1, 113.6, 111.9, 60.7, 47.9, 14.6; ESI-HRMS: calcd. for C<sub>18</sub>H<sub>18</sub>N<sub>2</sub>O<sub>2</sub>+H 295.1368, found 295.1365.

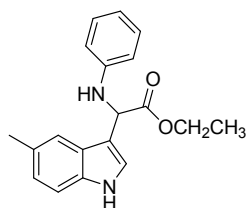

**ethyl 2-(5-methyl-1H-indol-3-yl)-2-(phenylamino)acetate (3ee)**

Following the general procedure for 10h. The product was purified on silica gel (PE/EA = 5:1) and the title compound was obtained in 75% yield (116 mg) as yellow oil. <sup>1</sup>H NMR (400

MHz, CDCl<sub>3</sub>)  $\delta$  (ppm) 10.84 (s, 1H, NH), 7.25-7.22 (m, 1H, ArH), 7.10-7.09 (m, 1H, ArH), 7.03-7.01 (m, 1H, ArH), 6.99-6.83 (m, 4H, ArH), 6.50-6.48 (m, 2H, ArH), 5.02 (s, 1H, CH), 4.99 (s, 1H, NH), 4.12-4.10 (m, 2H, CH<sub>2</sub>), 2.32 (s, 3H, CH<sub>3</sub>), 1.19-1.16 (m, 3H, CH<sub>3</sub>); <sup>13</sup>C NMR (100 MHz, CDCl<sub>3</sub>)  $\delta$  (ppm) 173.5, 148.0, 135.0, 129.2, 127.3, 127.0, 126.5, 123.8, 123.2, 118.6, 114.1, 113.0, 112.4, 111.7, 60.7, 47.9, 21.8, 14.6; ESI-HRMS: calcd. for C<sub>19</sub>H<sub>20</sub>N<sub>2</sub>O<sub>2</sub>+H 309.1525, found 309.1528.

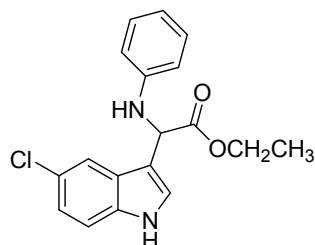

**ethyl 2-(5-chloro-1H-indol-3-yl)-2-(phenylamino)acetate (3ff)**

Following the general procedure for 10h. The product was purified on silica gel (PE/EA = 5:1) and the title compound was obtained in 70% yield (115 mg) as yellow oil. <sup>1</sup>H NMR (400 MHz, CDCl<sub>3</sub>)  $\delta$  (ppm) 11.2 (s, 1H, NH), 7.39-7.36 (m, 3H, ArH), 7.29-7.28 (m, 1H, ArH), 7.08-7.01 (m, 3H, ArH), 6.51-6.49 (m, 2H, ArH), 5.06 (s, 1H, CH), 5.02 (s, 1H, NH), 4.14-4.09 (m, 2H, CH<sub>2</sub>), 1.19-1.16 (m, 3H, CH<sub>3</sub>); <sup>13</sup>C NMR (100 MHz, CDCl<sub>3</sub>)  $\delta$  (ppm) 173.3, 148.1, 135.2, 129.2, 127.8, 126.2, 125.7, 123.6, 121.5, 118.5, 114.2, 113.5, 113.4, 60.8, 47.6, 14.5; ESI-HRMS: calcd. for C<sub>18</sub>H<sub>17</sub>ClN<sub>2</sub>O<sub>2</sub>+H 329.0979, found 329.0980.

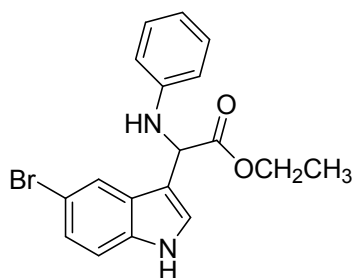

**ethyl 2-(5-bromo-1H-indol-3-yl)-2-(phenylamino)acetate (3gg)**

Following the general procedure for 10h. The product was purified on silica gel (PE/EA = 5:1) and the title compound was obtained in 65% yield (121 mg) as yellow oil. <sup>1</sup>H NMR (400 MHz, CDCl<sub>3</sub>)  $\delta$  (ppm) 11.20 (s, 1H, NH), 7.55 (s, 1H, ArH), 7.36-7.33 (m, 3H, ArH), 7.28-7.27 (m, 1H, ArH), 7.03-7.01 (m, 2H, ArH), 6.52-6.50 (m, 2H, ArH), 5.07 (s, 1H, CH), 5.02 (s, 1H, NH), 4.16-4.05 (m, 2H, CH<sub>2</sub>), 1.20-1.16 (m, 3H, CH<sub>3</sub>); <sup>13</sup>C NMR (100 MHz, CDCl<sub>3</sub>)  $\delta$  (ppm) 173.3, 148.1, 135.4, 129.2, 128.6, 126.2, 125.5, 124.1, 121.6, 114.2, 114.0, 113.4, 111.6, 60.8, 47.6, 14.5; ESI-HRMS: calcd. for C<sub>18</sub>H<sub>17</sub>BrN<sub>2</sub>O<sub>2</sub>+H 373.0473, found 373.0475.

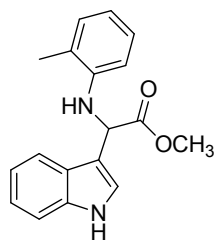

**methyl 2-(1H-indol-3-yl)-2-(o-tolylamino)acetate (3hh)**

Following the general procedure for 10h. The product was purified on silica gel (PE/EA = 5:1) and the title compound was obtained in 58% yield (85 mg) as yellow oil. <sup>1</sup>H NMR (400 MHz, CDCl<sub>3</sub>) δ (ppm) 10.98 (s, 1H, NH), 7.37-7.34 (m, 2H, ArH), 7.18-7.17 (m, 1H, ArH), 7.08-7.04 (m, 1H, ArH), 6.95-6.90 (m, 4H, ArH), 6.54-6.52 (m, 1H, ArH), 5.05 (s, 1H, CH), 4.77 (s, 1H, NH), 3.64 (s, 3H, CH<sub>3</sub>), 2.01 (s, 3H, CH<sub>3</sub>); <sup>13</sup>C NMR (100 MHz, CDCl<sub>3</sub>) δ (ppm) 174.0, 146.0, 136.7, 130.3, 126.8, 123.8, 121.6, 121.3, 119.0, 118.9, 114.2, 113.5, 111.9, 52.2, 47.8, 18.0; ESI-HRMS: calcd. for C<sub>18</sub>H<sub>18</sub>N<sub>2</sub>O<sub>2</sub>+H 295.1368, found 295.1365.

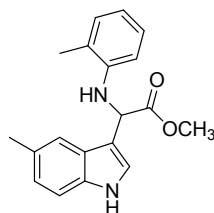

**methyl 2-(5-methyl-1H-indol-3-yl)-2-(o-tolylamino)acetate (3ii)**

Following the general procedure for 10h. The product was purified on silica gel (PE/EA = 5:1) and the title compound was obtained in 49% yield (75 mg) as yellow oil. <sup>1</sup>H NMR (400 MHz, CDCl<sub>3</sub>) δ (ppm) 10.84 (s, 1H, NH), 7.28-7.22 (m, 2H, ArH), 7.14-7.10 (m, 2H, ArH), 6.92-6.88 (m, 3H, ArH), 6.53-6.51 (m, 1H, ArH), 5.00 (s, 1H, CH), 4.77 (s, 1H, NH), 3.63 (s, 3H, CH<sub>3</sub>), 2.32 (s, 3H, CH<sub>3</sub>), 2.00 (s, 3H, CH<sub>3</sub>); <sup>13</sup>C NMR (100 MHz, CDCl<sub>3</sub>) δ (ppm) 174.0, 146.0, 135.0, 130.2, 127.3, 127.0, 126.8, 123.9, 121.3, 114.1, 112.9, 111.7, 52.2, 47.7, 21.8, 18.0; ESI-HRMS: calcd. for C<sub>19</sub>H<sub>20</sub>N<sub>2</sub>O<sub>2</sub>+H 309.1525, found 309.1530.

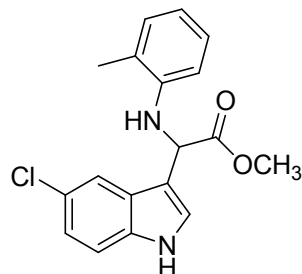

**methyl 2-(5-chloro-1H-indol-3-yl)-2-(o-tolylamino)acetate (3jj)**

Following the general procedure for 10h. The product was purified on silica gel (PE/EA = 5:1) and the title compound was obtained in 61% yield (100 mg) as yellow oil. <sup>1</sup>H NMR (400 MHz, CDCl<sub>3</sub>) δ (ppm) 11.20 (s, 1H, NH), 7.38-7.36 (m, 3H, ArH), 7.29 (s, 1H, ArH), 7.07-

7.04 (m, 1H, ArH), 6.91-6.79 (m, 2H, ArH), 6.54-6.52 (s, 1H, ArH), 5.07 (s, 1H, CH), 4.79 (s, 1H, NH), 3.64 (s, 3H, CH<sub>3</sub>), 2.00 (s, 3H, CH<sub>3</sub>); <sup>13</sup>C NMR (100 MHz, CDCl<sub>3</sub>) δ (ppm) 173.8, 146.1, 135.1, 130.2, 127.9, 126.7, 126.5, 125.7, 123.6, 121.6, 121.3, 118.4, 114.2, 113.6, 113.4, 52.3, 47.4, 18.0; ESI-HRMS: calcd. for C<sub>18</sub>H<sub>17</sub>ClN<sub>2</sub>O<sub>2</sub>+H 329.0979, found 329.0980.

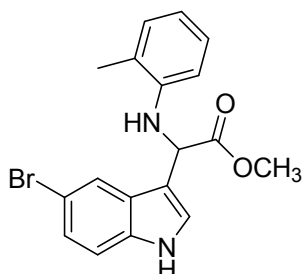

### **methyl 2-(5-bromo-1H-indol-3-yl)-2-(o-tolylamino)acetate (3kk)**

Following the general procedure for 10h. The product was purified on silica gel (PE/EA = 5:1) and the title compound was obtained in 60% yield (111 mg) as yellow oil. <sup>1</sup>H NMR (400 MHz, CDCl<sub>3</sub>) δ (ppm) 11.23 (s, 1H, NH), 7.54-7.53 (m, 1H, ArH), 7.35-7.17 (m, 4H, ArH), 6.93-6.90 (m, 2H, ArH), 6.56-6.54 (m, 1H, ArH), 5.09 (s, 1H, CH), 4.81 (s, 1H, NH), 3.64 (s, 3H, CH<sub>3</sub>), 2.02 (s, 3H, CH<sub>3</sub>); <sup>13</sup>C NMR (100 MHz, CDCl<sub>3</sub>) δ (ppm) 173.8, 146.1, 135.4, 130.2, 128.6, 126.7, 126.5, 125.6, 124.1, 121.4, 114.2, 114.0, 113.3, 111.6, 52.3, 47.4, 18.0; ESI-HRMS: calcd. for C<sub>18</sub>H<sub>17</sub>BrN<sub>2</sub>O<sub>2</sub>+H 373.0473, found 373.0480.

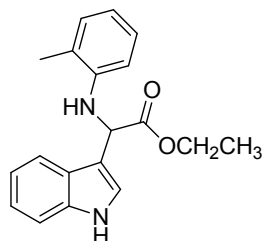

### **ethyl 2-(1H-indol-3-yl)-2-(o-tolylamino)acetate (3ll)**

Following the general procedure for 10h. The product was purified on silica gel (PE/EA = 5:1) and the title compound was obtained in 61% yield (94 mg) as yellow oil. <sup>1</sup>H NMR (400 MHz, CDCl<sub>3</sub>) δ (ppm) 11.0 (s, 1H, NH), 7.39-7.34 (m, 2H, ArH), 7.17-7.16 (m, 1H, ArH), 7.08-7.04 (m, 1H, ArH), 6.95-6.92 (m, 4H, ArH), 6.54-6.52 (m, 1H, ArH), 5.01 (s, 1H, CH), 4.77 (s, 1H, NH), 4.14-4.01 (m, 2H, CH<sub>2</sub>), 2.01 (s, 3H, CH<sub>3</sub>), 1.20-1.16 (m, 3H, CH<sub>3</sub>); <sup>13</sup>C NMR (100 MHz, CDCl<sub>3</sub>) δ (ppm) 173.5, 146.0, 136.7, 130.3, 127.9, 126.8, 126.5, 123.7, 121.6, 121.3, 119.1, 119.0, 114.2, 113.7, 112.0, 60.7, 48.0, 18.0, 14.6; ESI-HRMS: calcd. for C<sub>19</sub>H<sub>20</sub>N<sub>2</sub>O<sub>2</sub>+H 309.1525, found 309.1528.

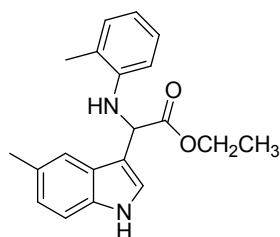

**ethyl 2-(5-methyl-1H-indol-3-yl)-2-(o-tolylamino)acetate (3mm)**

Following the general procedure for 10h. The product was purified on silica gel (PE/EA = 5:1) and the title compound was obtained in 68% yield (109 mg) as yellow oil. <sup>1</sup>H NMR (400 MHz, CDCl<sub>3</sub>) δ (ppm) 10.83 (s, 1H, NH), 7.25-7.10 (m, 3H, ArH), 6.93-6.78 (m, 4H, ArH), 6.54-6.51 (m, 1H, ArH), 4.97 (s, 1H, CH), 4.77 (s, 1H, NH), 4.14-4.05 (m, 2H, CH<sub>2</sub>), 2.32 (s, 3H, CH<sub>3</sub>), 2.01 (s, 3H, CH<sub>3</sub>), 1.20-1.16 (m, 3H, CH<sub>3</sub>); <sup>13</sup>C NMR (100 MHz, CDCl<sub>3</sub>) δ (ppm) 173.5, 145.9, 135.0, 130.2, 127.3, 127.0, 123.8, 123.2, 121.2, 118.5, 114.2, 113.8, 113.0, 112.3, 111.7, 110.4, 109.4, 60.7, 47.9, 21.8, 18.1, 14.6; ESI-HRMS: calcd. for C<sub>20</sub>H<sub>22</sub>N<sub>2</sub>O<sub>2</sub>+H 323.1681, found 323.1678.

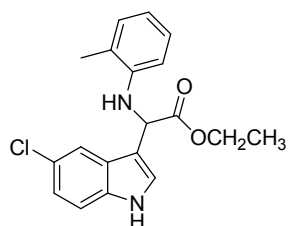

**ethyl 2-(5-chloro-1H-indol-3-yl)-2-(o-tolylamino)acetate (3nn)**

Following the general procedure for 10h. The product was purified on silica gel (PE/EA = 5:1) and the title compound was obtained in 71% yield (121 mg) as yellow oil. <sup>1</sup>H NMR (400 MHz, CDCl<sub>3</sub>) δ (ppm) 11.20 (s, 1H, NH), 7.43-7.28 (m, 4H, ArH), 7.07-6.89(m, 3H, ArH), 6.54-6.52 (m, 1H, ArH), 5.03 (s, 1H, CH), 4.79 (s, 1H, NH), 4.16-4.07 (m, 2H, CH<sub>2</sub>), 2.10 (s, 3H, CH<sub>3</sub>), 1.24-1.16 (m, 3H, CH<sub>3</sub>); <sup>13</sup>C NMR (100 MHz, CDCl<sub>3</sub>) δ (ppm) 173.3, 146.0, 135.2, 130.2, 127.9, 126.7, 126.5, 125.7, 123.6, 121.5, 121.3, 118.5, 114.2, 113.5, 60.8, 47.6, 18.0, 14.6; ESI-HRMS: calcd. for C<sub>19</sub>H<sub>19</sub>ClN<sub>2</sub>O<sub>2</sub>+H 343.1135, found 343.1140.

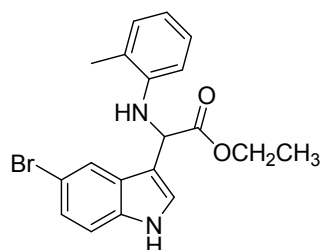

**ethyl 2-(5-bromo-1H-indol-3-yl)-2-(o-tolylamino)acetate (3oo)**

Following the general procedure for 10h. The product was purified on silica gel (PE/EA = 5:1) and the title compound was obtained in 69% yield (133 mg) as yellow oil. <sup>1</sup>H NMR (400

MHz, CDCl<sub>3</sub>) δ (ppm) 11.2 (s, 1H, NH), 7.55-7.54 (m, 1H, ArH), 7.36-7.16 (m, 4H, ArH), 6.92-6.89 (m, 2H, ArH), 6.55-6.53 (m, 1H, ArH), 5.04 (s, 1H, CH), 4.79 (s, 1H, NH), 4.17-4.06 (m, 2H, CH<sub>2</sub>), 2.01 (s, 3H, CH<sub>3</sub>), 1.19-1.16 (m, 3H, CH<sub>3</sub>); <sup>13</sup>C NMR (100 MHz, CDCl<sub>3</sub>) δ (ppm) 173.3, 146.0, 135.5, 135.4, 130.2, 126.7, 125.5, 124.1, 121.5, 121.3, 114.2, 114.1, 114.0, 113.4, 112.3, 111.6, 60.8, 47.6, 18.0, 14.6; ESI-HRMS: calcd. for C<sub>19</sub>H<sub>19</sub>BrN<sub>2</sub>O<sub>2</sub>+H 387.0630, found 387.0632.

#### 4. <sup>1</sup>H and <sup>13</sup>C NMR spectra of products

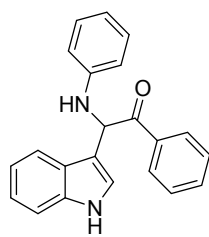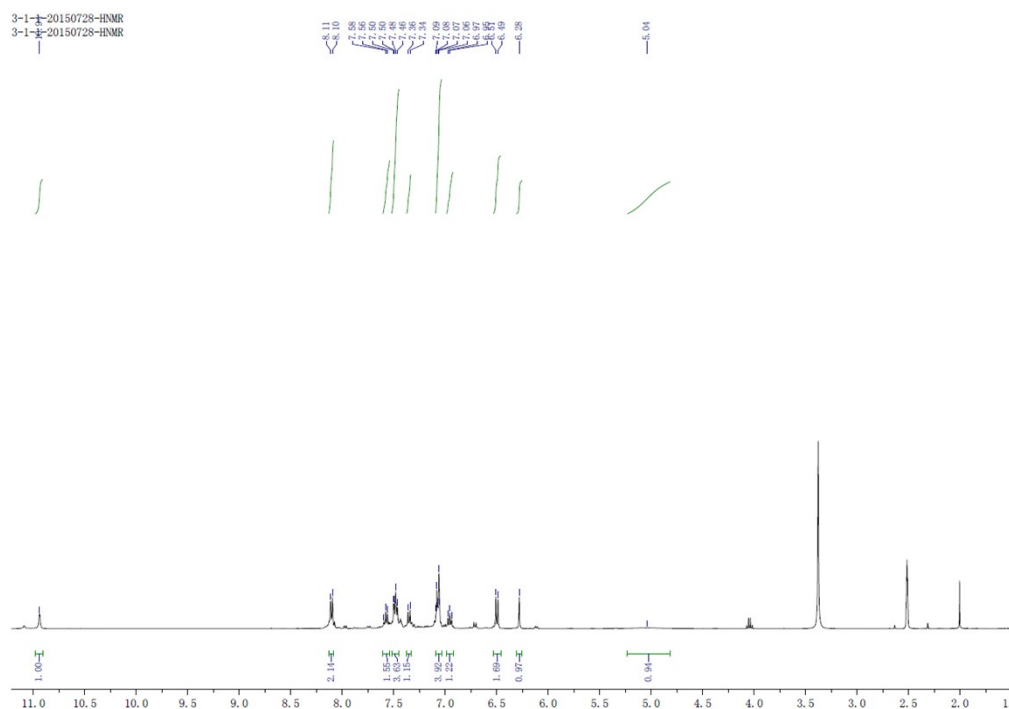

3-1-1-20150728-CNMR  
3-1-1-20150728-CNMR

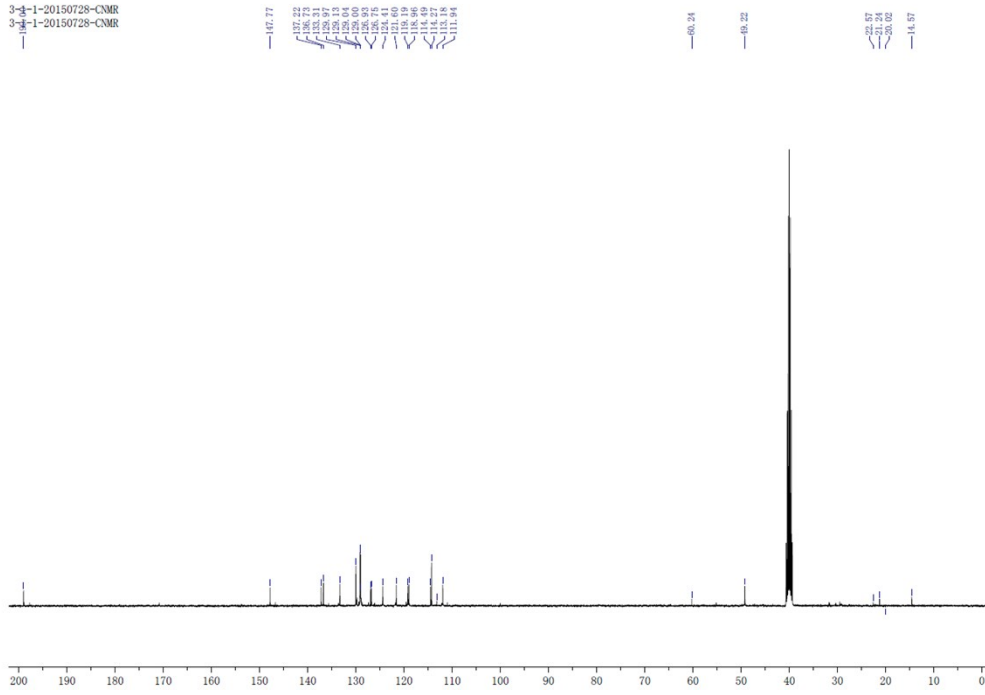



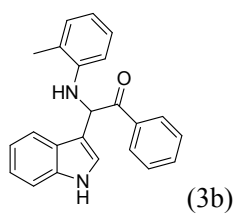

3-4-1-20150717-HMR  
3-4-1-20150717-HMR

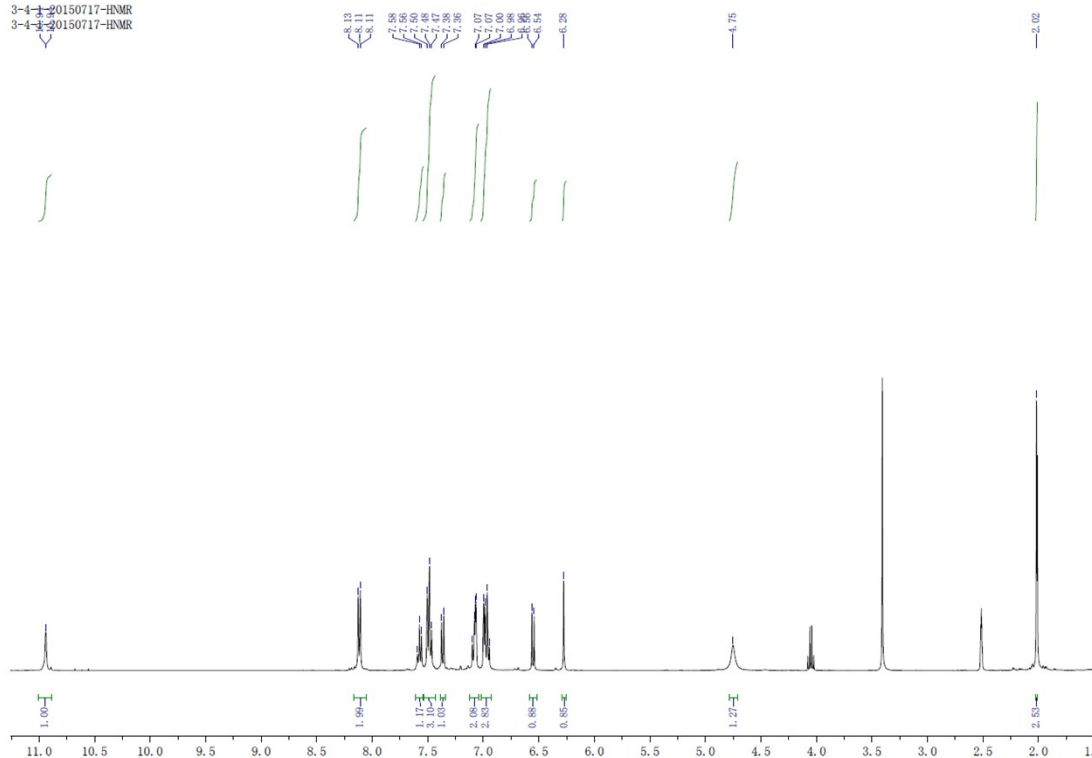

3-4-1-20150717-CMR  
3-4-1-20150717-CMR

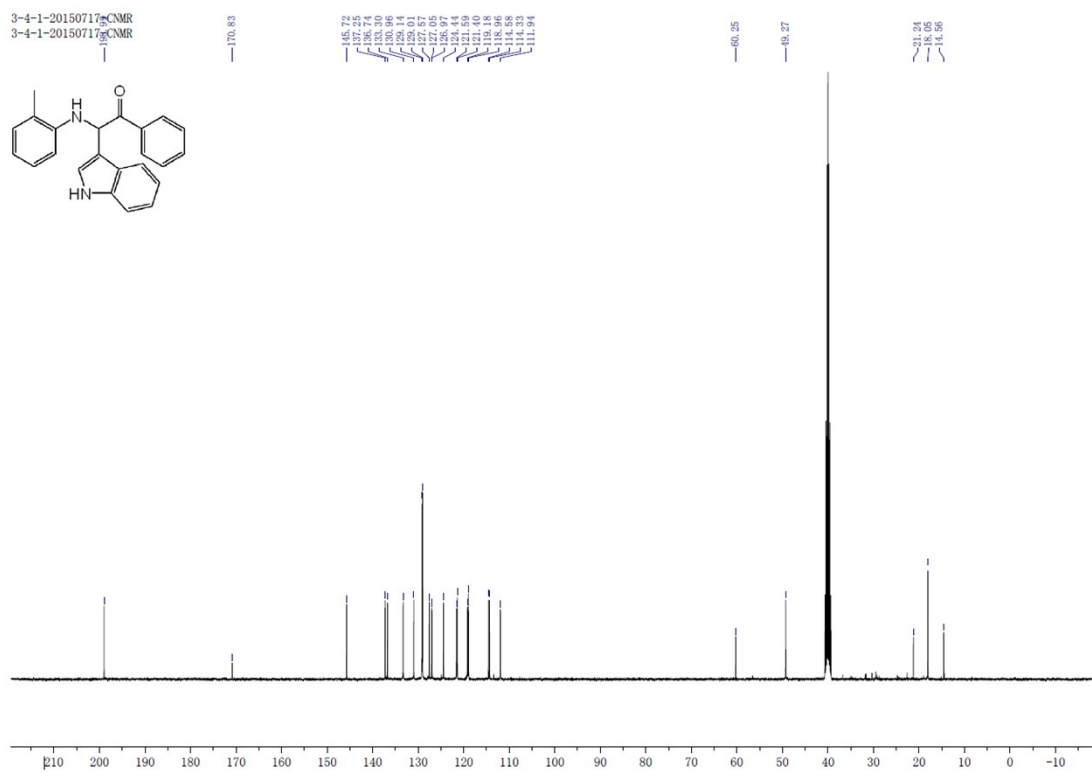

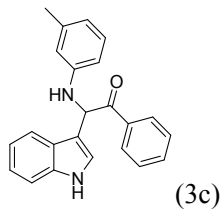

3-2-1-20150716-HNMR  
 3-2-1-20150716-HNMR

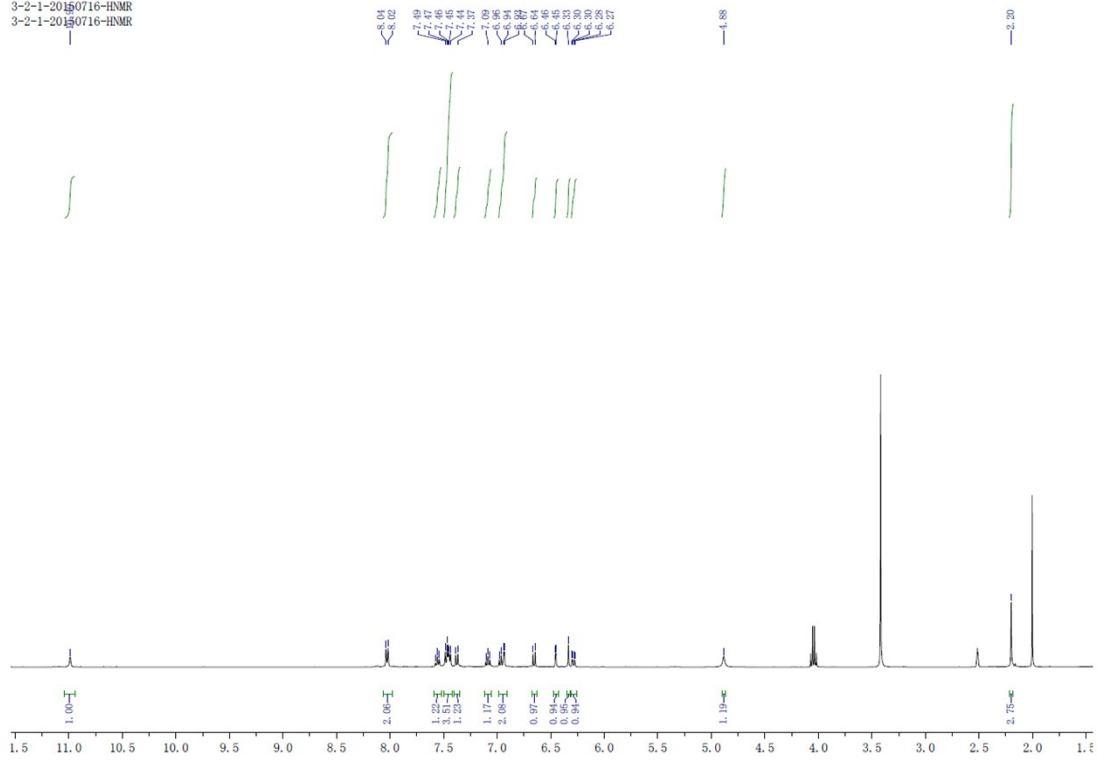

3-2-1-20150716-CNMR  
 3-2-1-20150716-CNMR

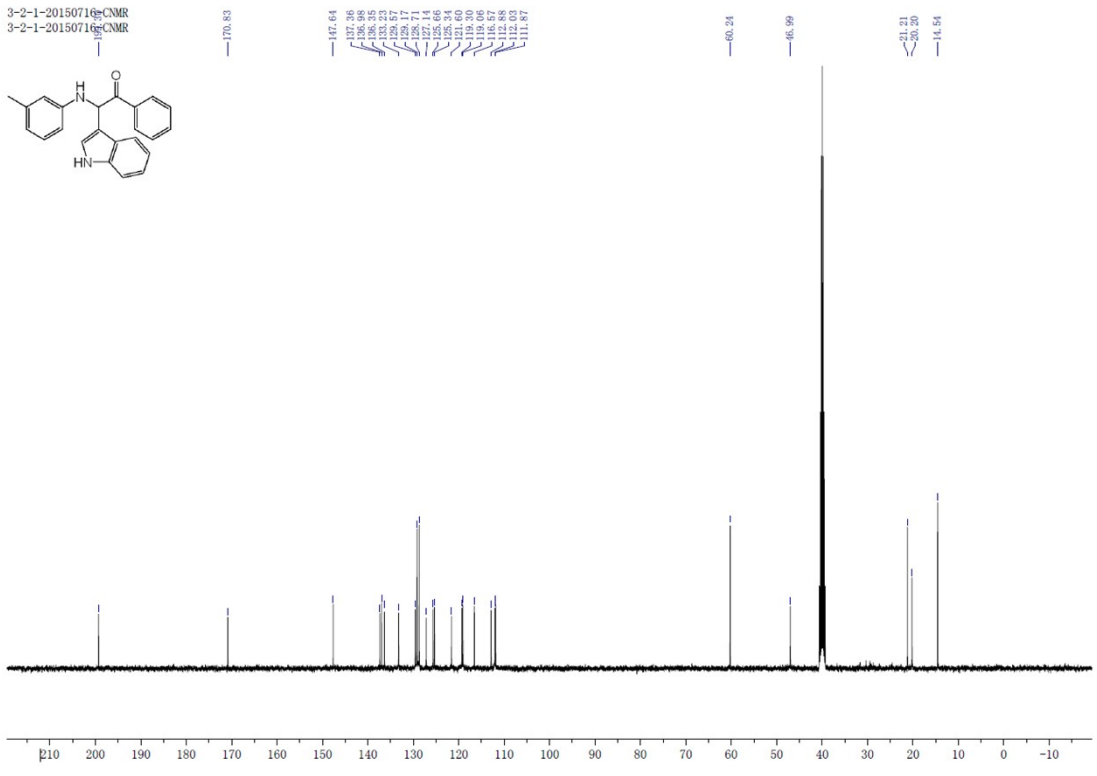

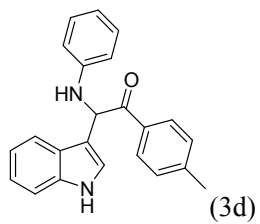

3-8-1-20150724-HNMR  
3-8-1-20150724-HNMR

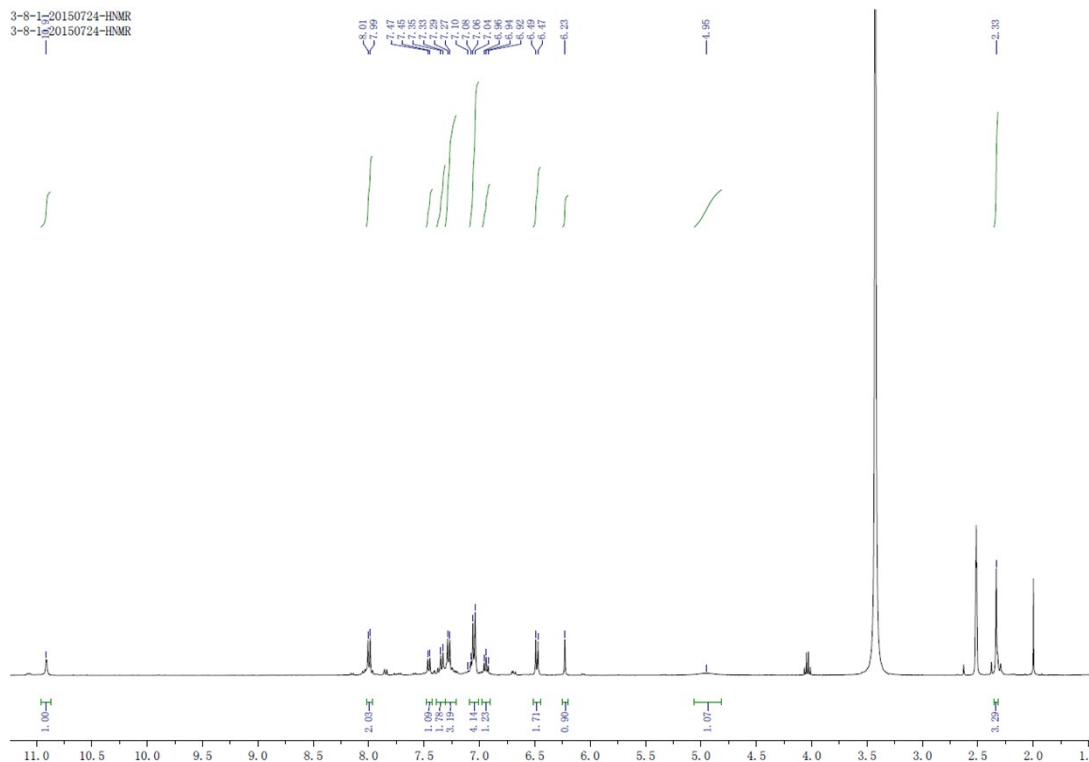

3-8-1-20150724-CNMR  
3-8-1-20150724-CNMR

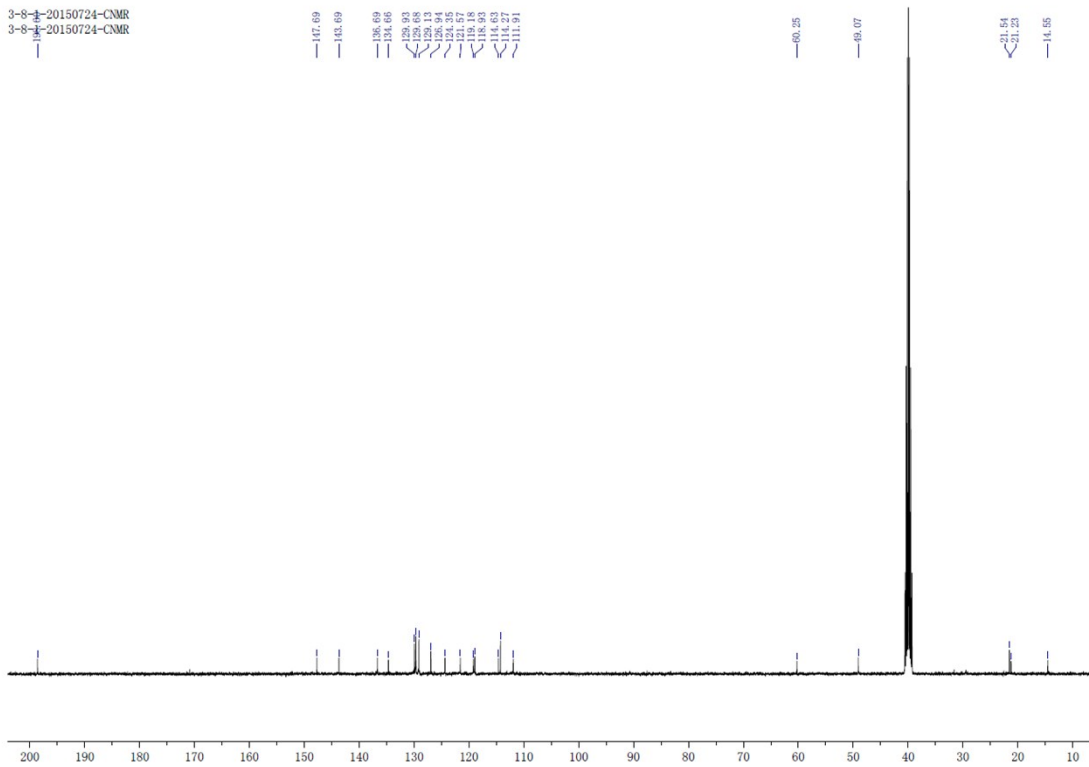

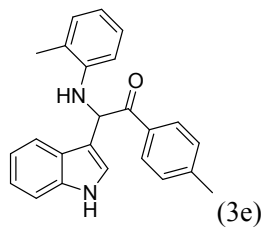

3-5-1-20150721-HMR  
3-5-1-20150721-HMR

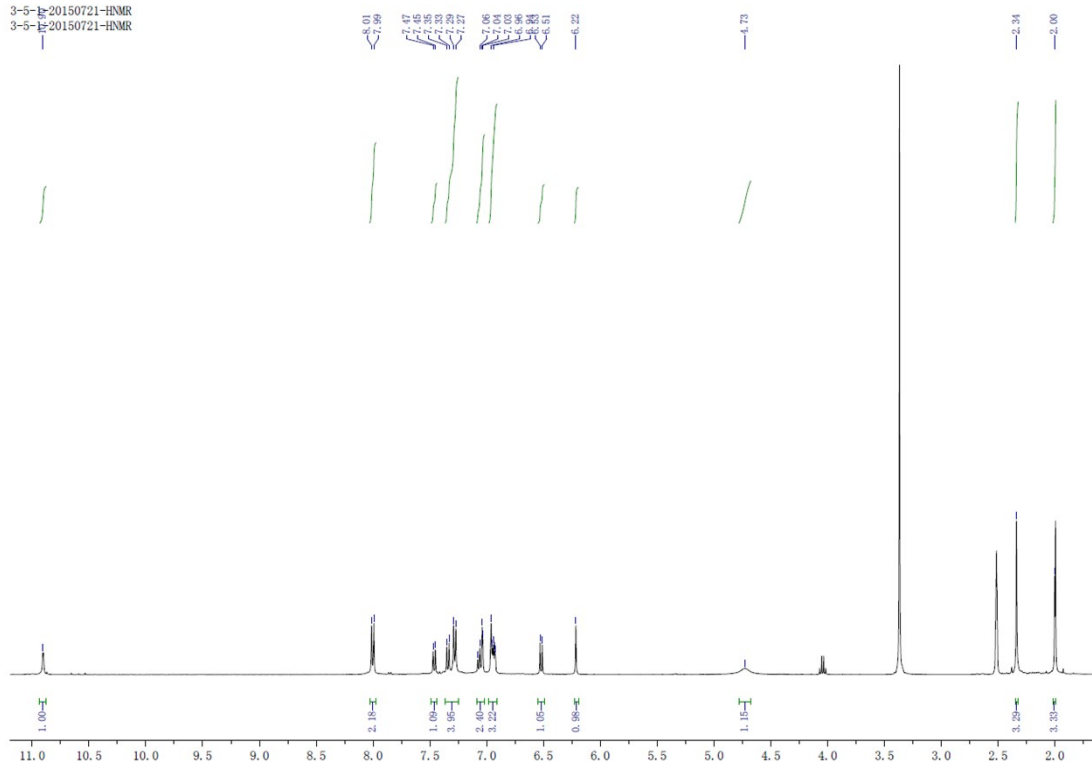

3-5-1-20150721-CNMR  
3-5-1-20150721-CNMR

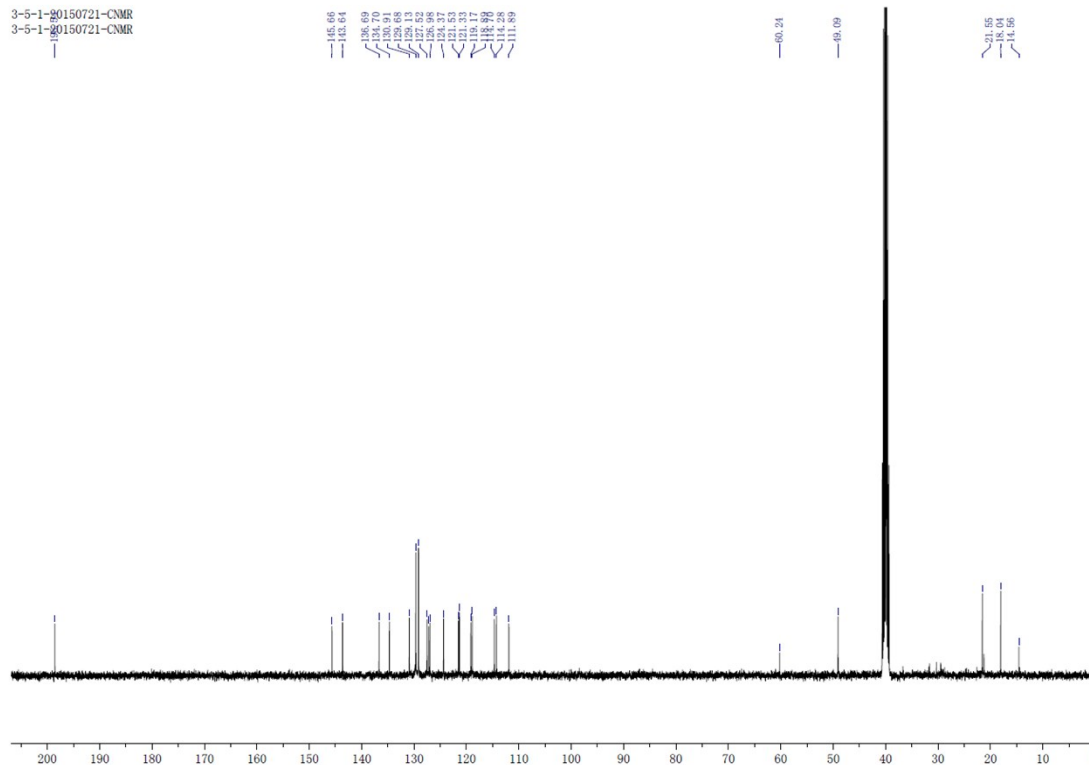

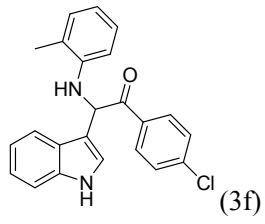

3-6-1-20150724-HMR  
 3-6-1-20150724-HMR

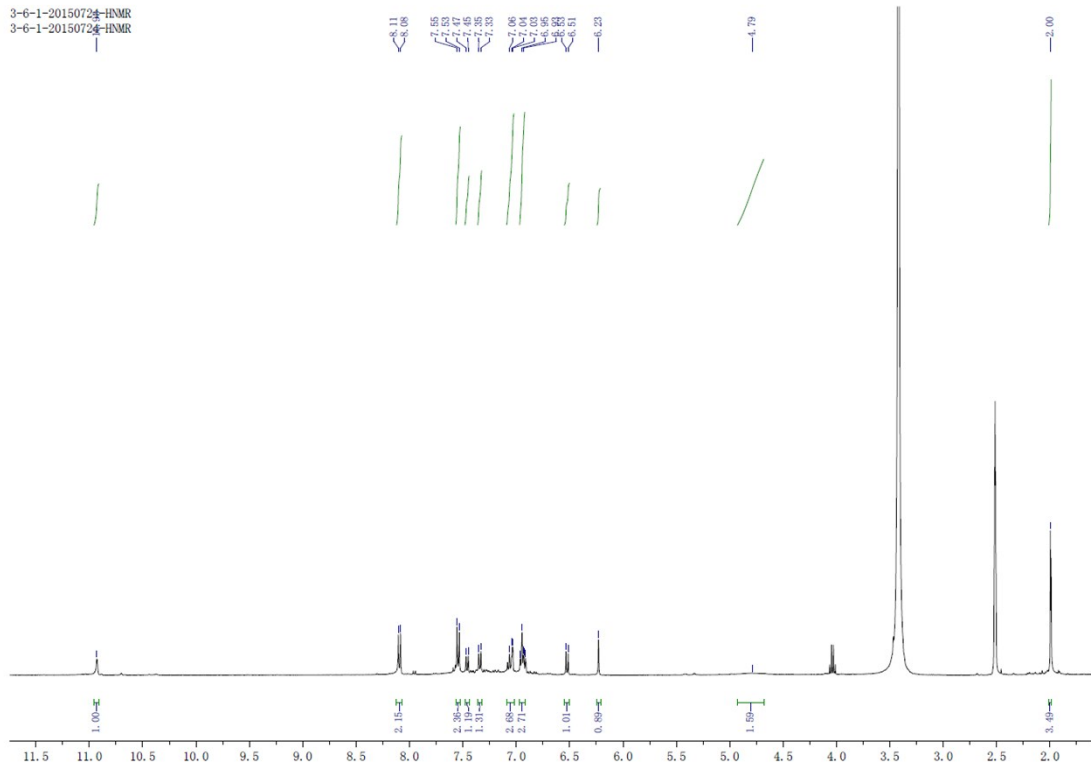

3-6-1-20150724-CMR  
 3-6-1-20150724-CMR

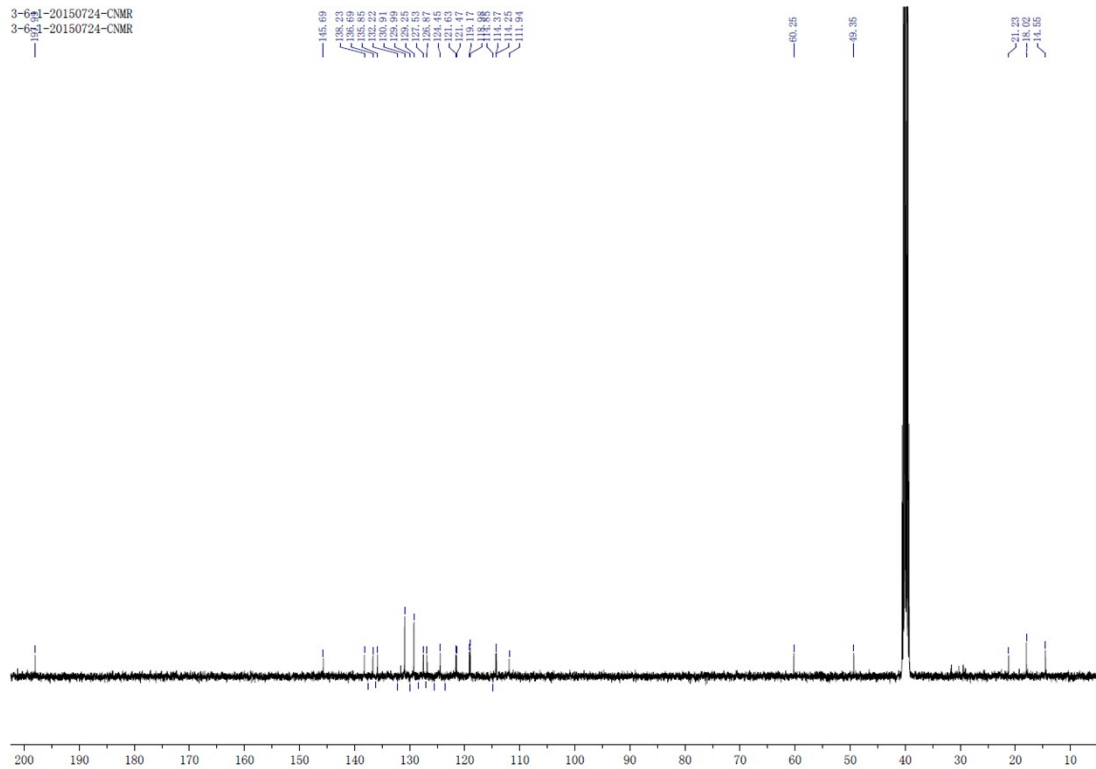

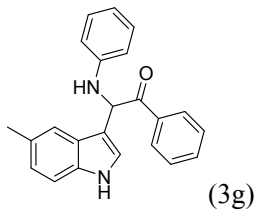

3-1-2-20150715-HNMR  
3-1-2-20150715-HNMR

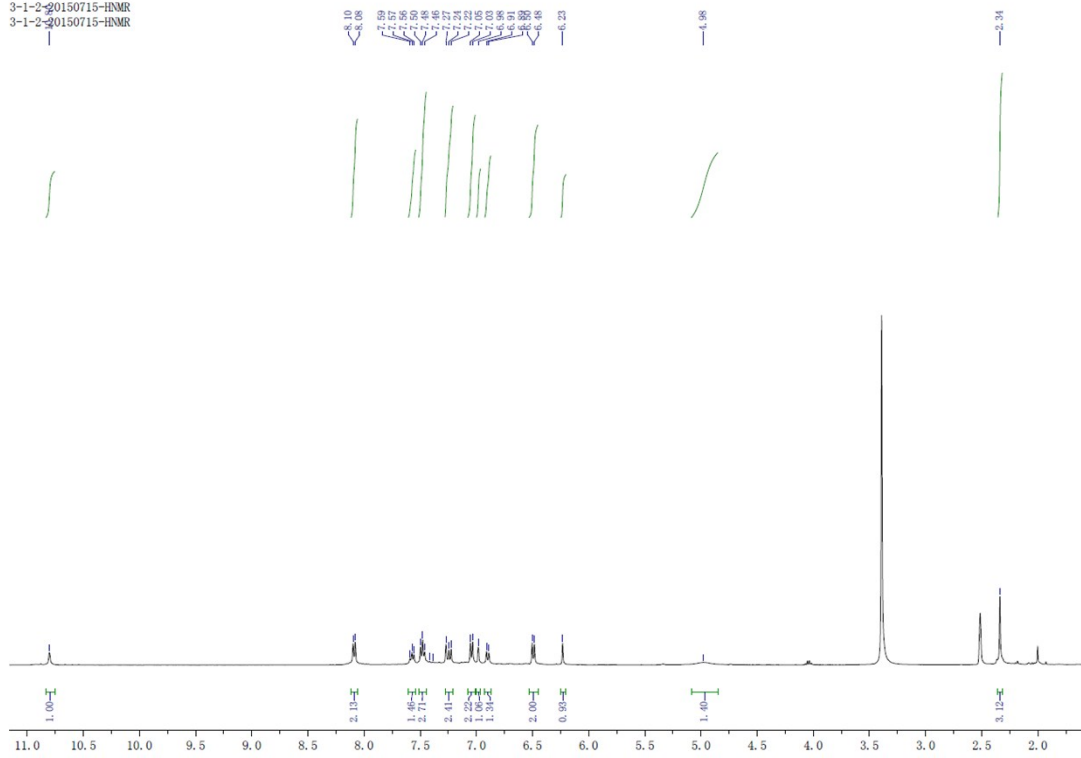

3-1-2-20150715-CNMR  
3-1-2-20150715-CNMR

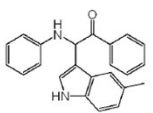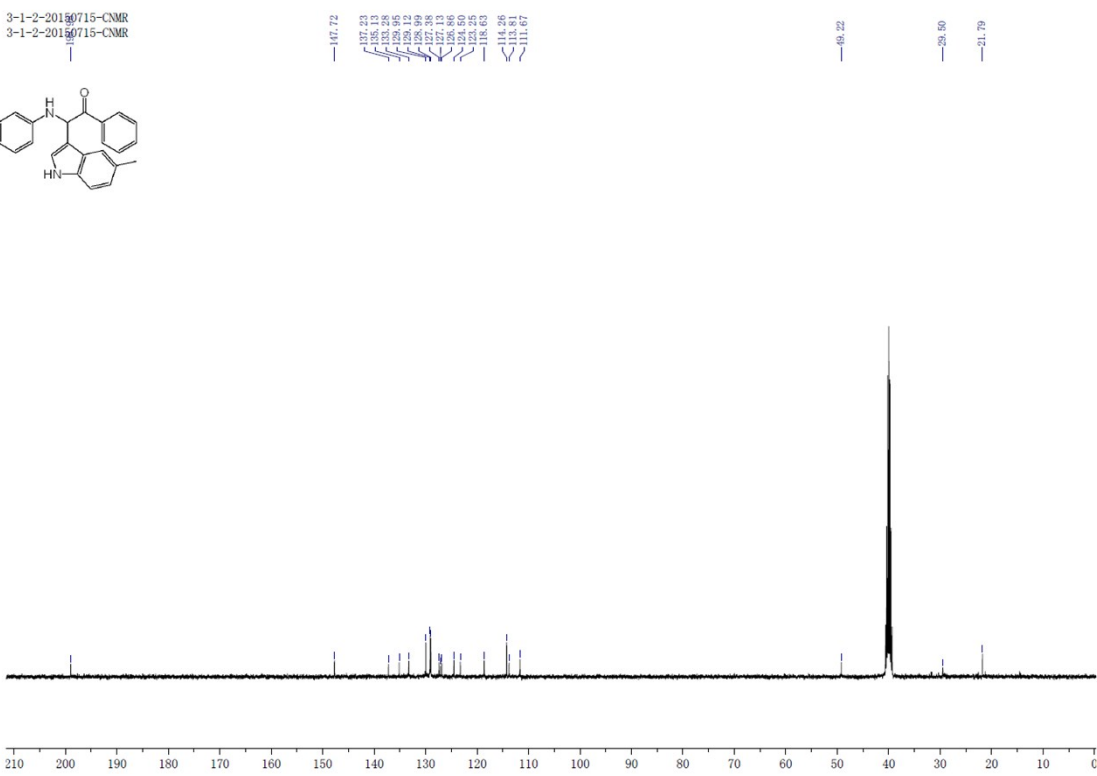

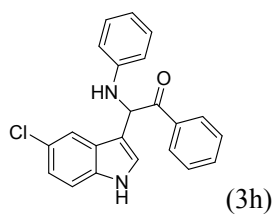

3-1-3-20150715-1H-NMR  
3-1-3-20150715-1H-NMR

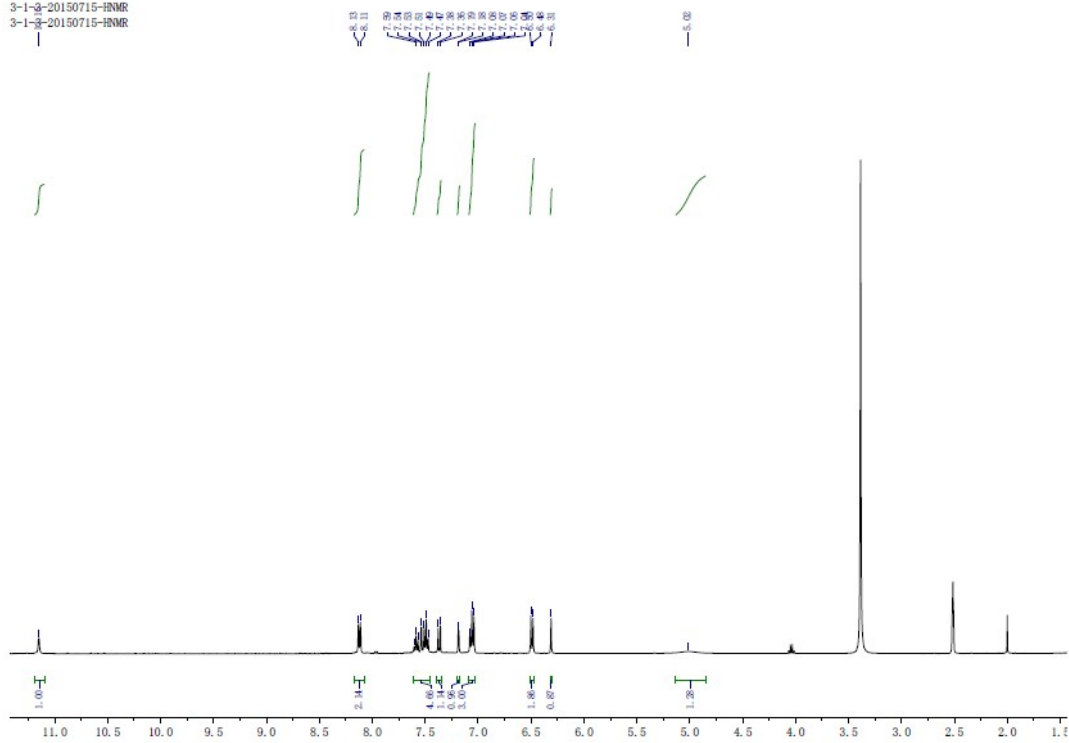

3-1-3-20150715-13C-NMR  
3-1-3-20150715-13C-NMR

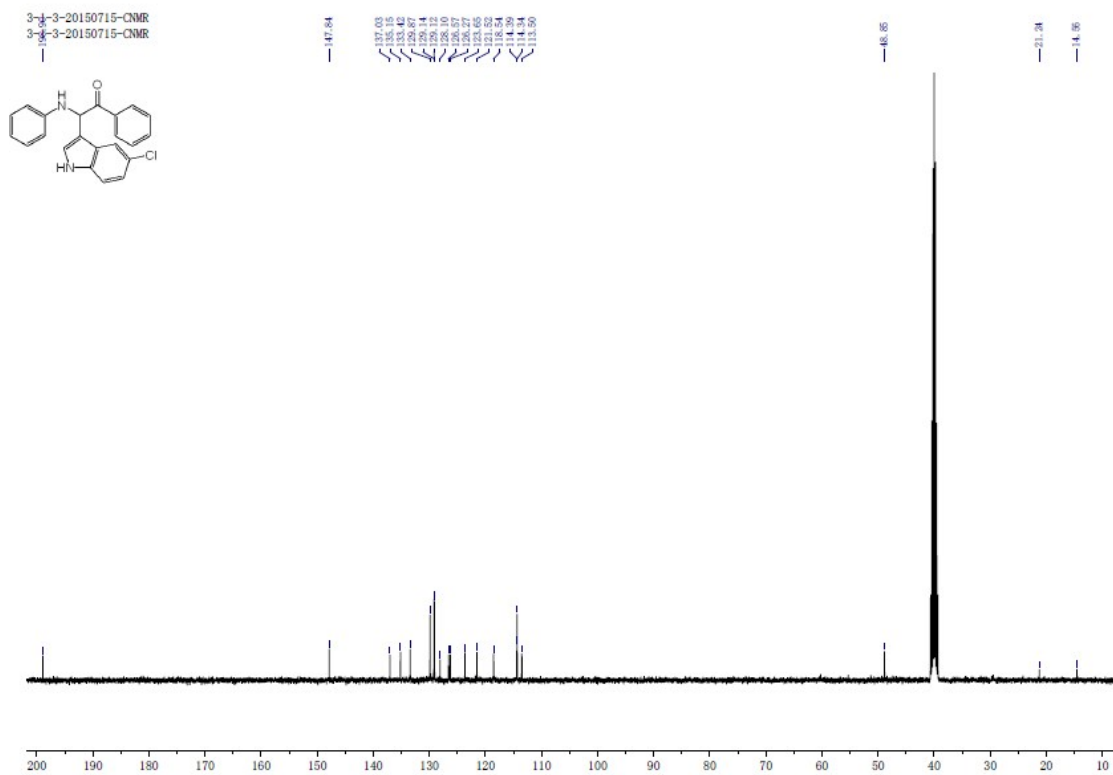

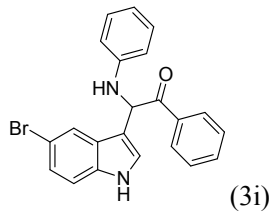

3-1-4-20150713-<sup>1</sup>H-NMR  
 3-1-4-20150713-<sup>1</sup>H-NMR

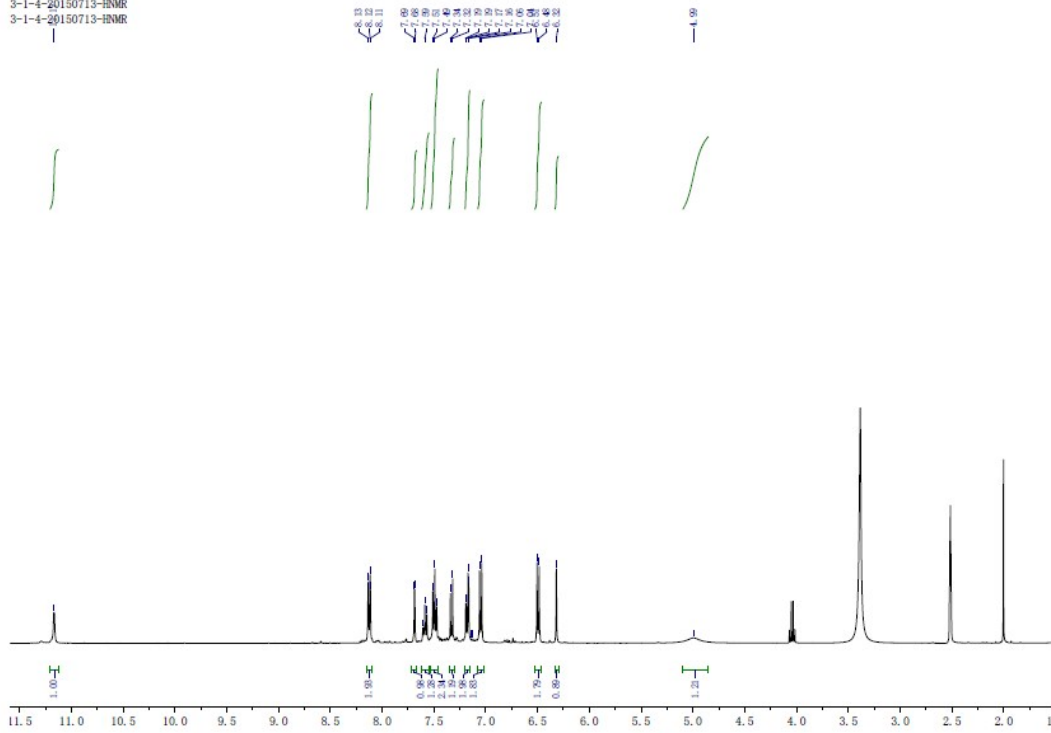

3-1-4-20150713-<sup>13</sup>C-NMR  
 3-1-4-20150713-<sup>13</sup>C-NMR

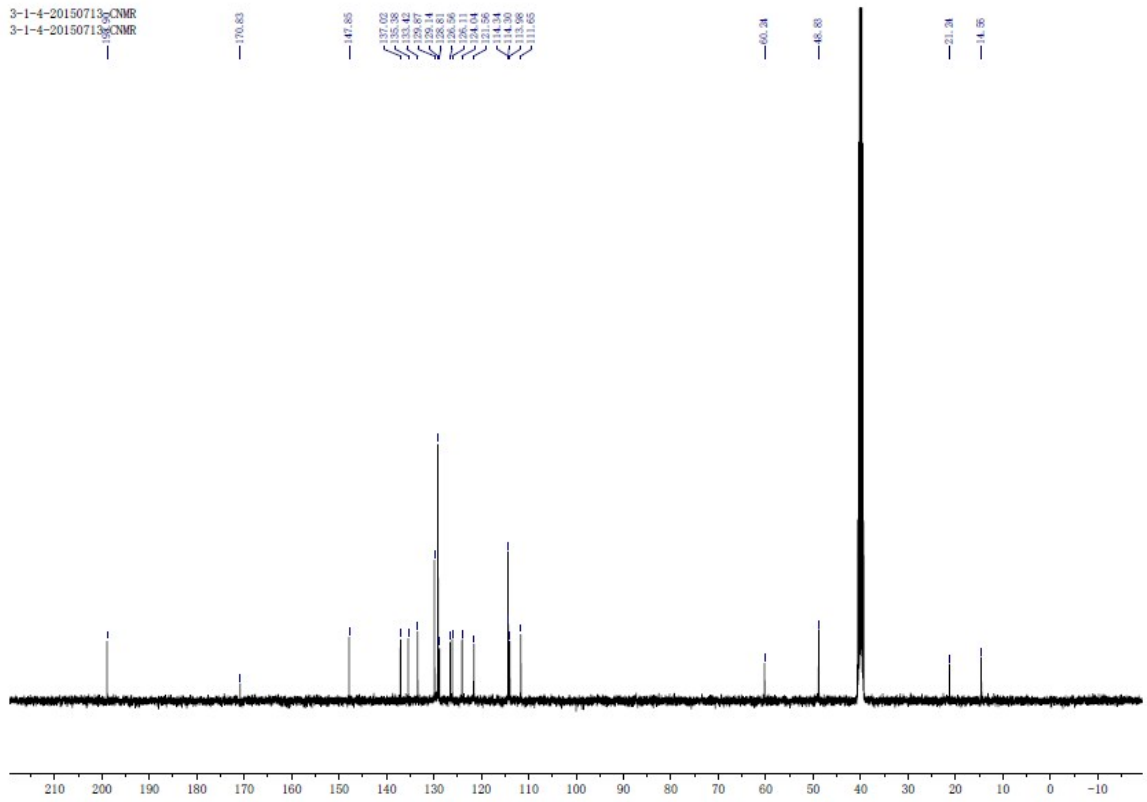



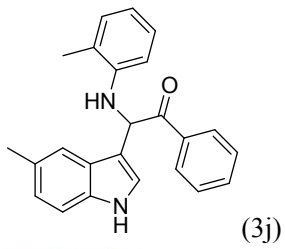

3-4-2-20150717-1HMR  
3-4-2-20150717-1HMR

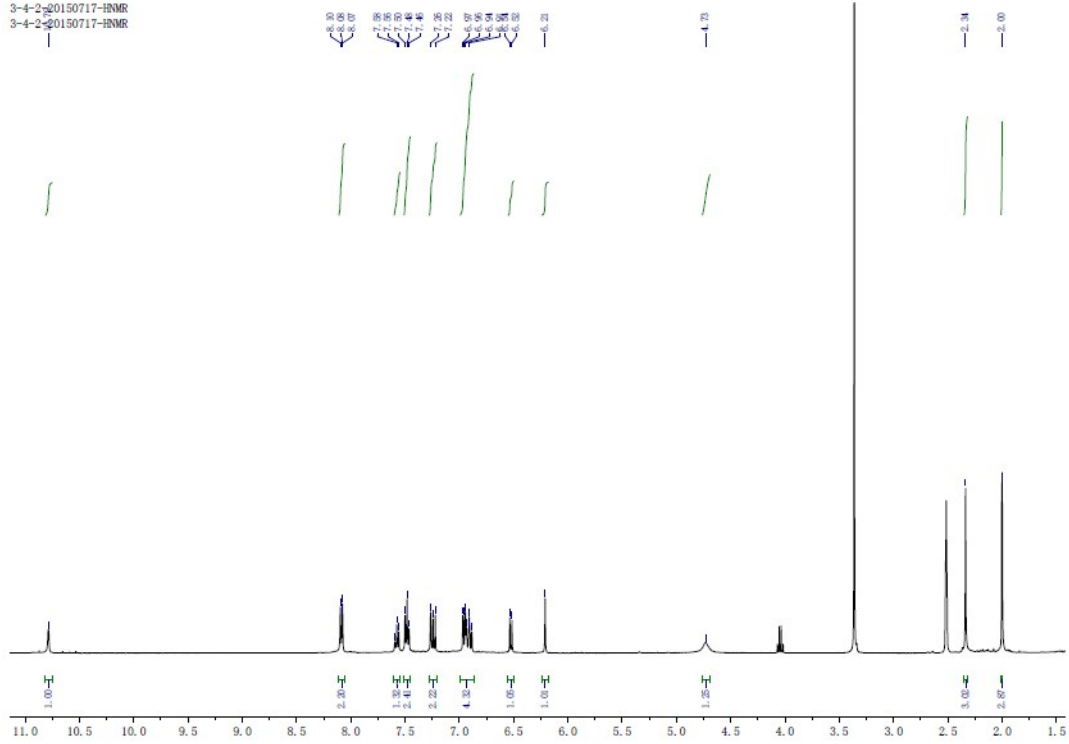

3-4-2-20150717-13CNMR  
3-4-2-20150717-13CNMR

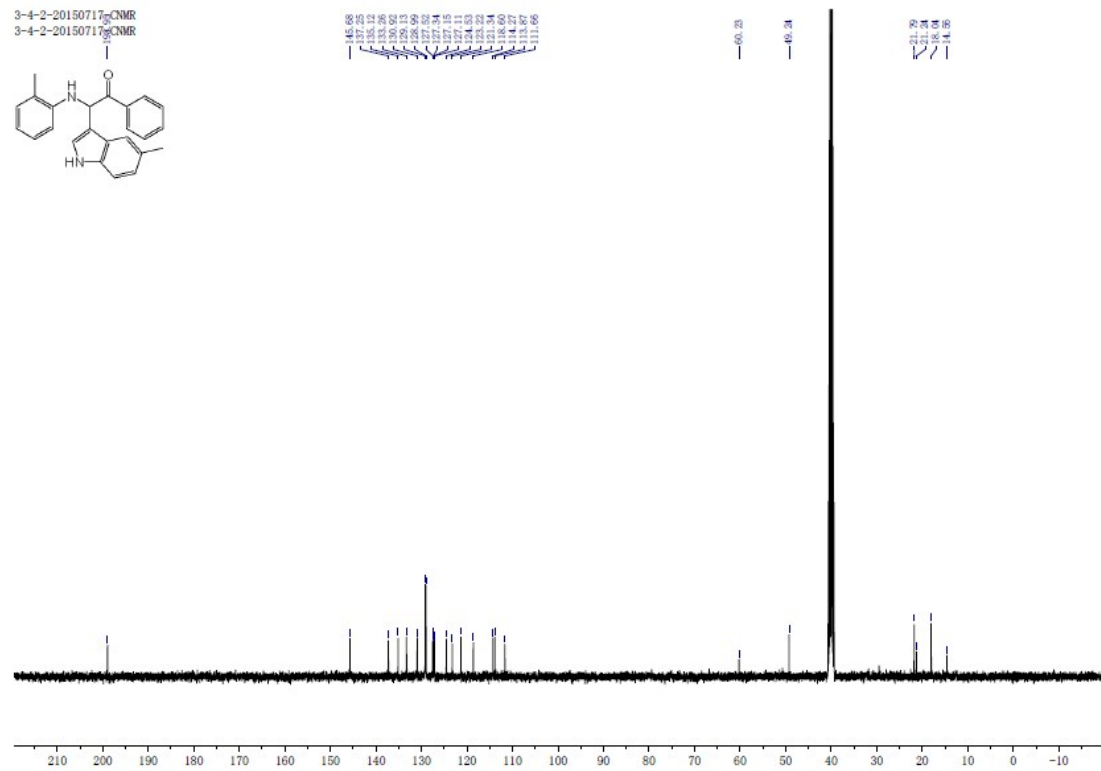

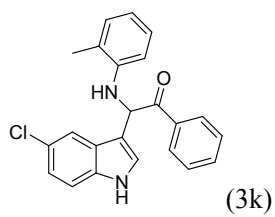

3-4-3-20150720-<sup>1</sup>H-NMR

3-4-3-20150720-<sup>1</sup>H-NMR

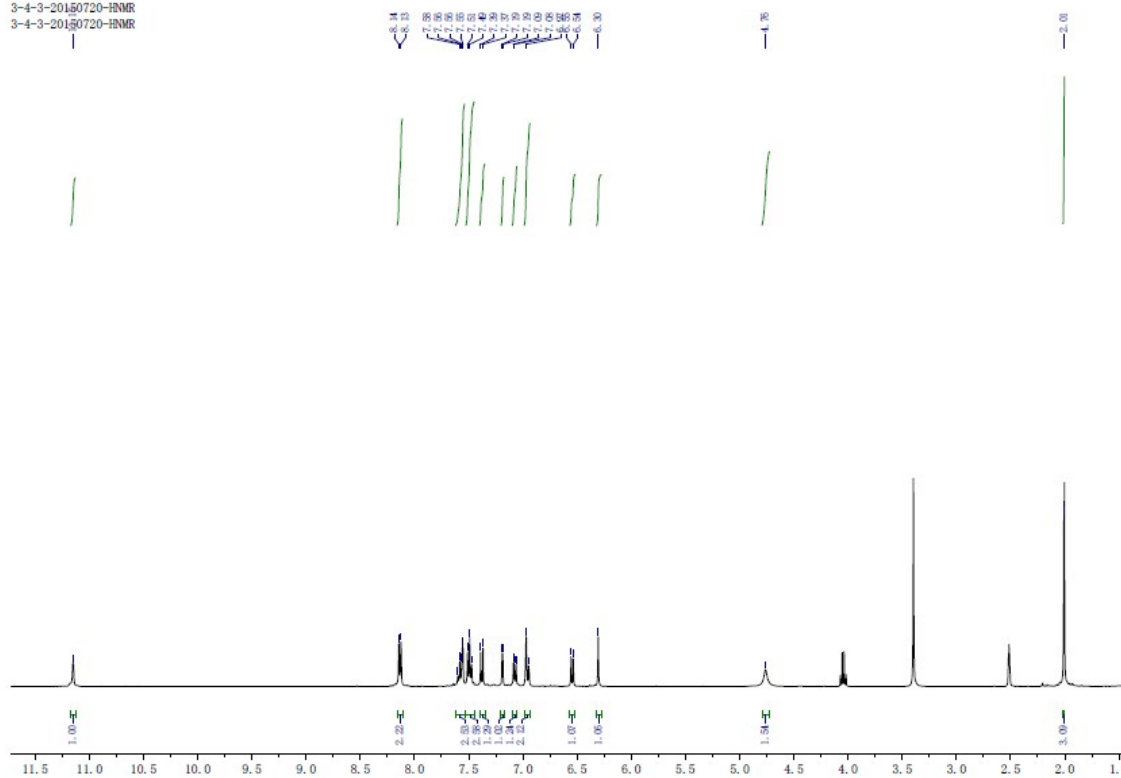

3-4-3-20150720-CNMR

3-4-3-20150720-CNMR

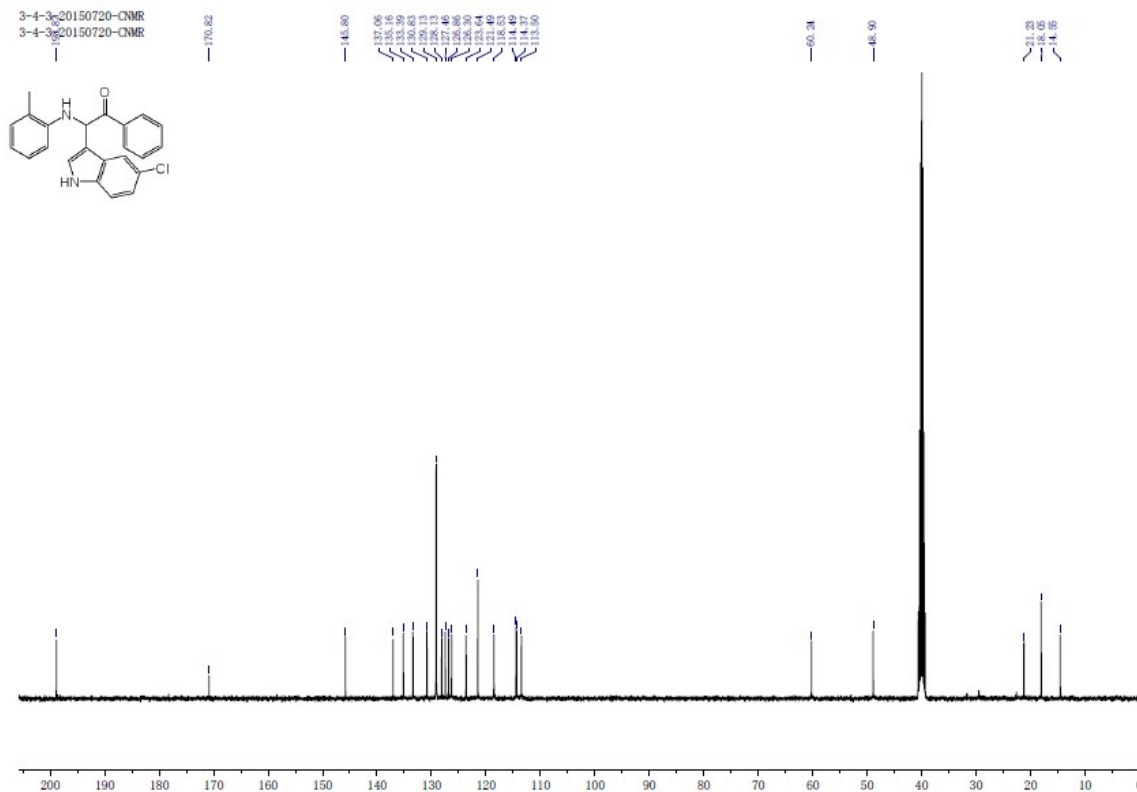

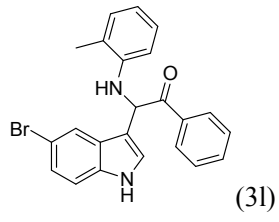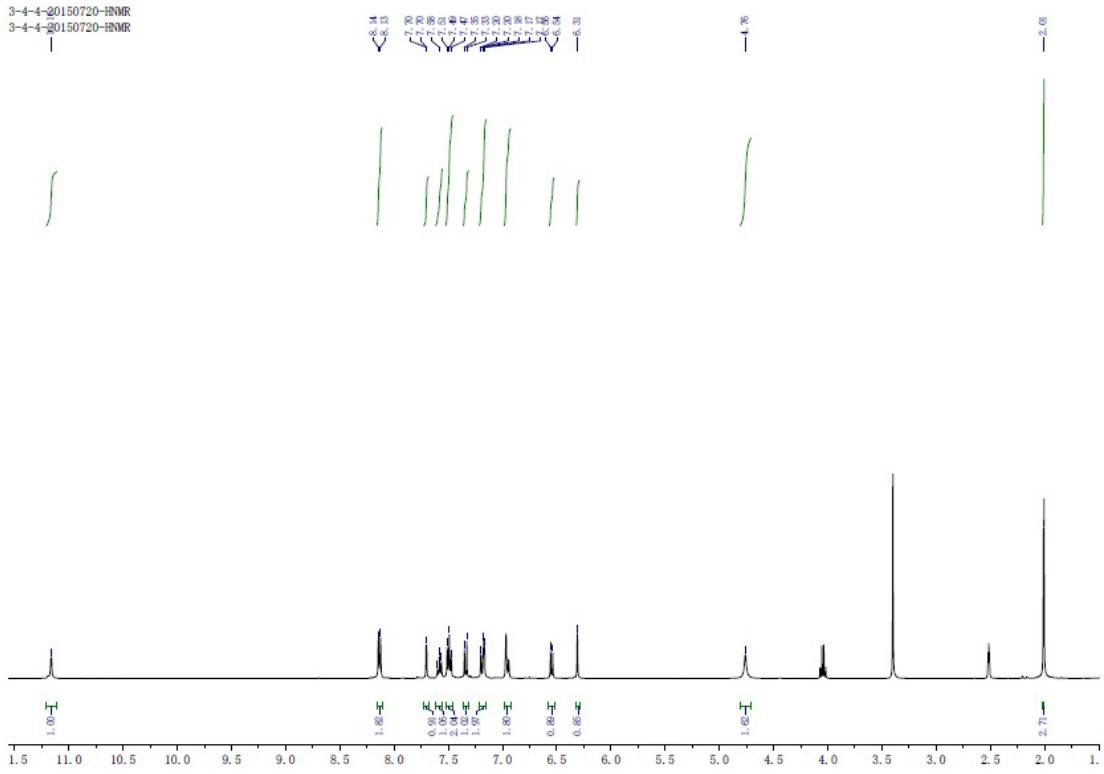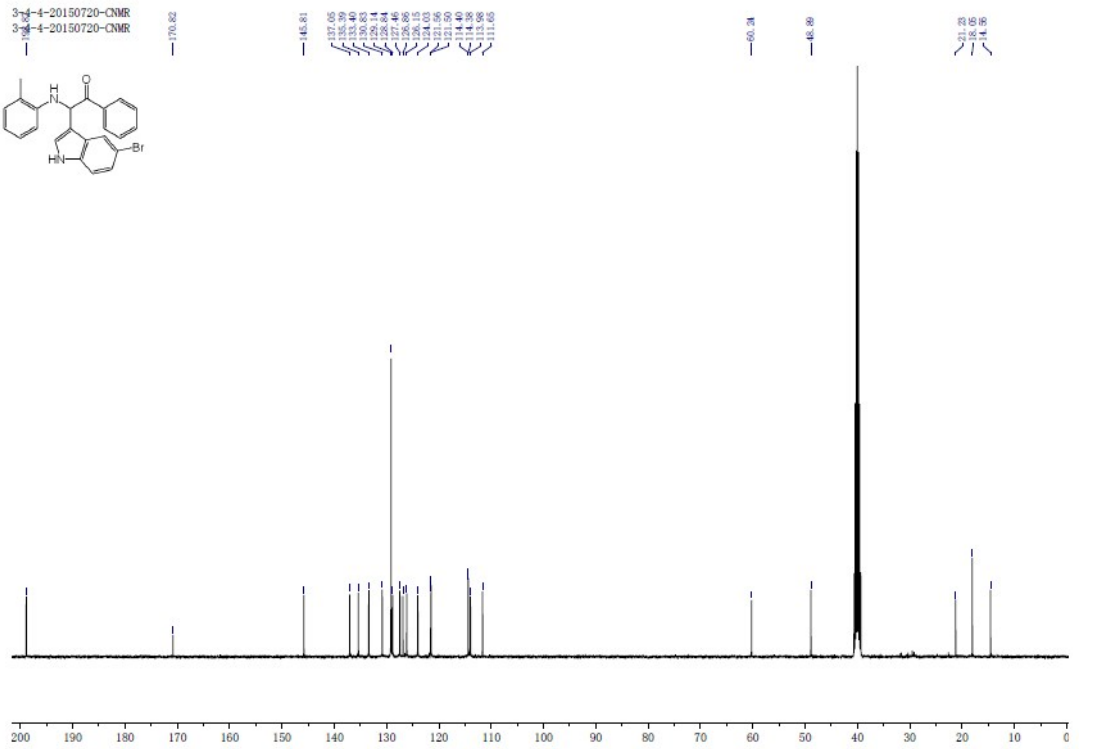

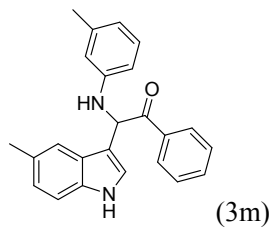

3-2-2-20150713-1HMR  
3-2-2-20150713-1HMR

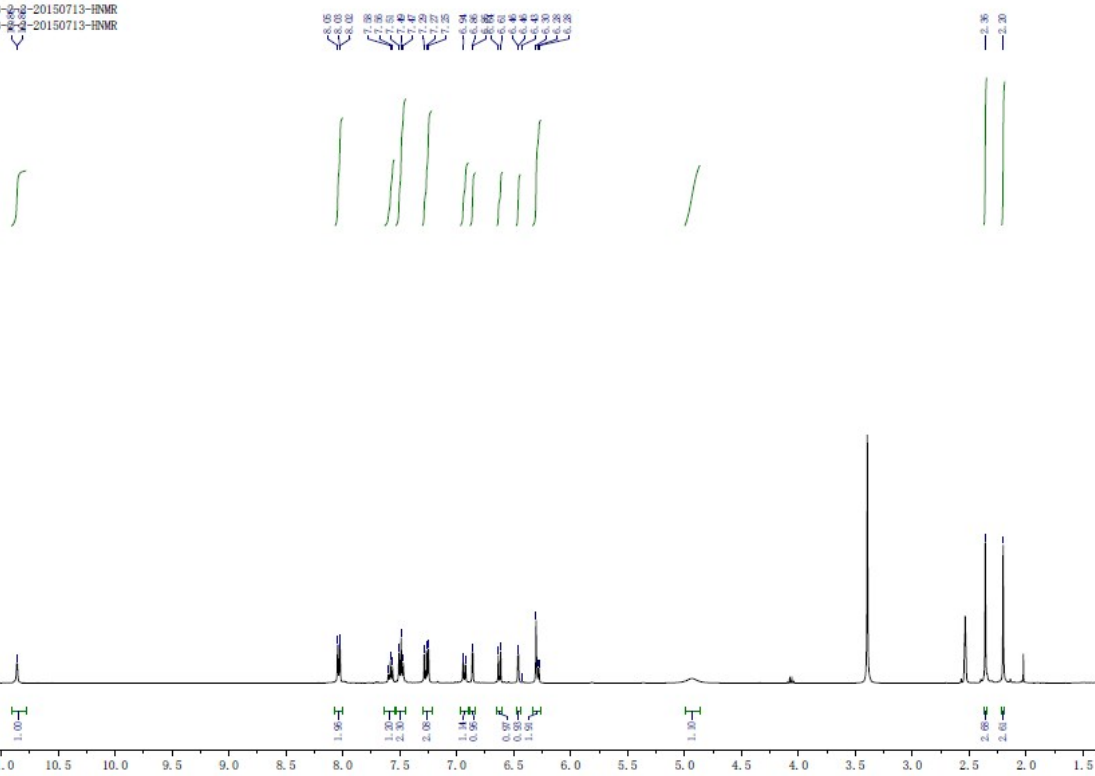

3-2-2-20150713-CNMR  
3-2-2-20150713-CNMR

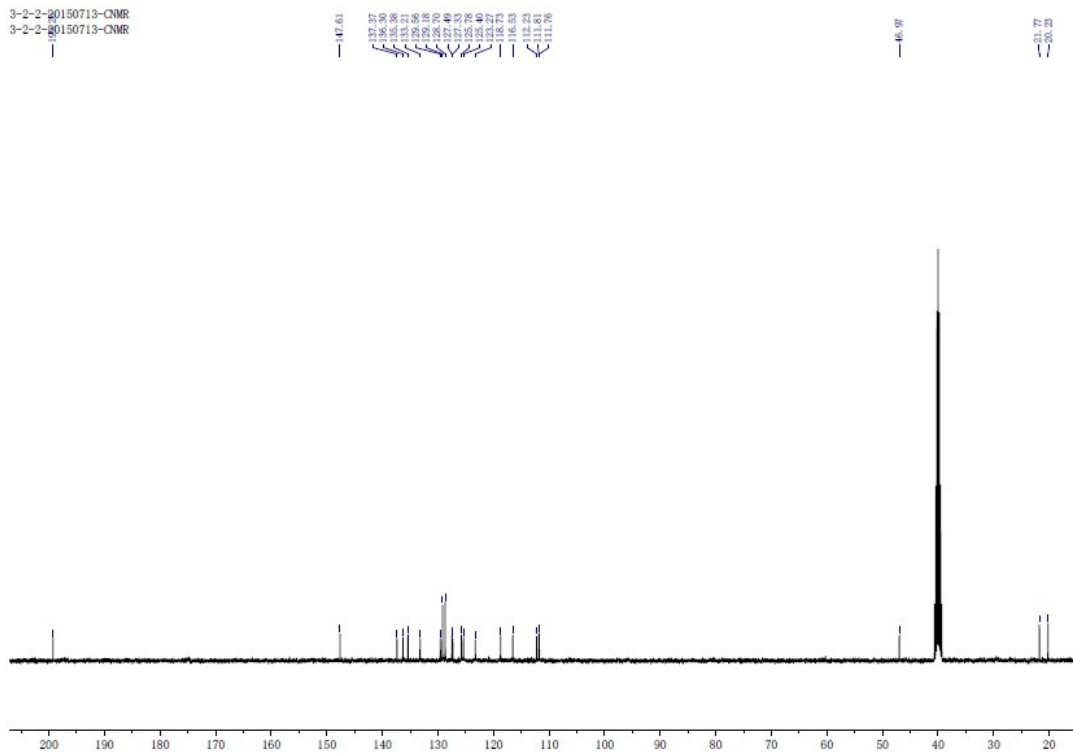

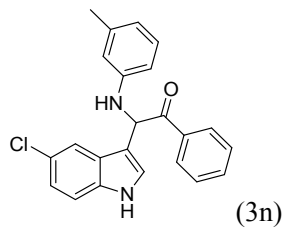

3-2-3-20150714-HNMR  
3-2-3-20150714-HNMR

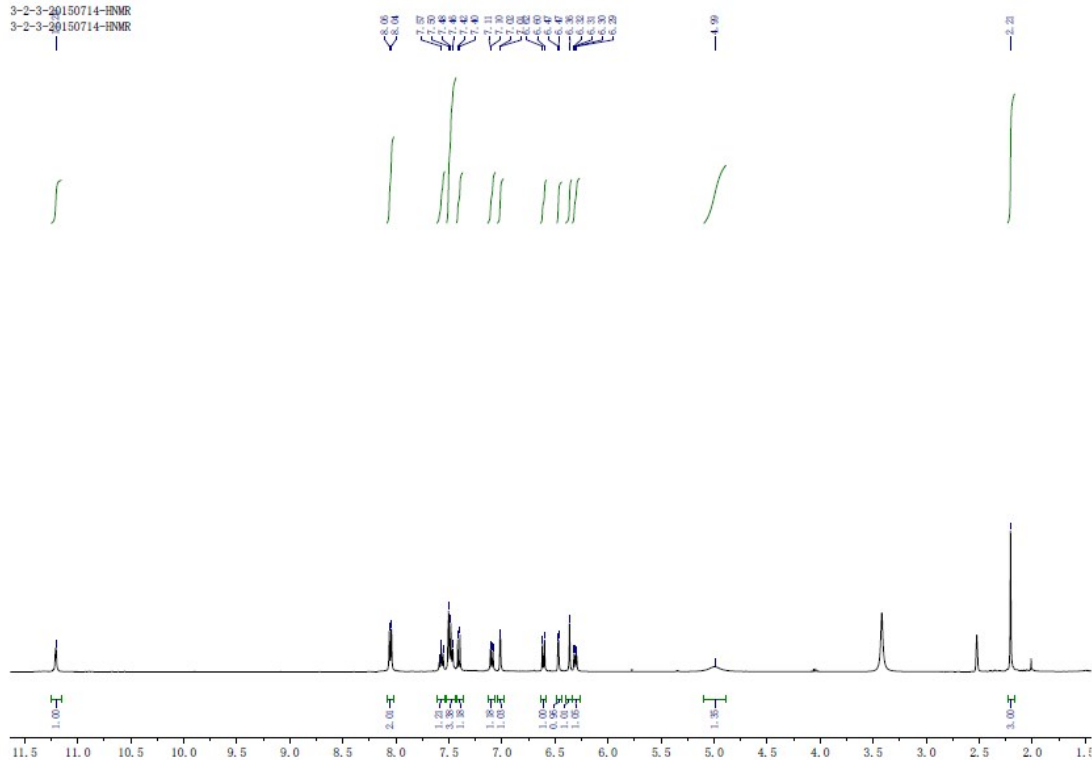

3-2-3-20150714-CNMR  
3-2-3-20150714-CNMR

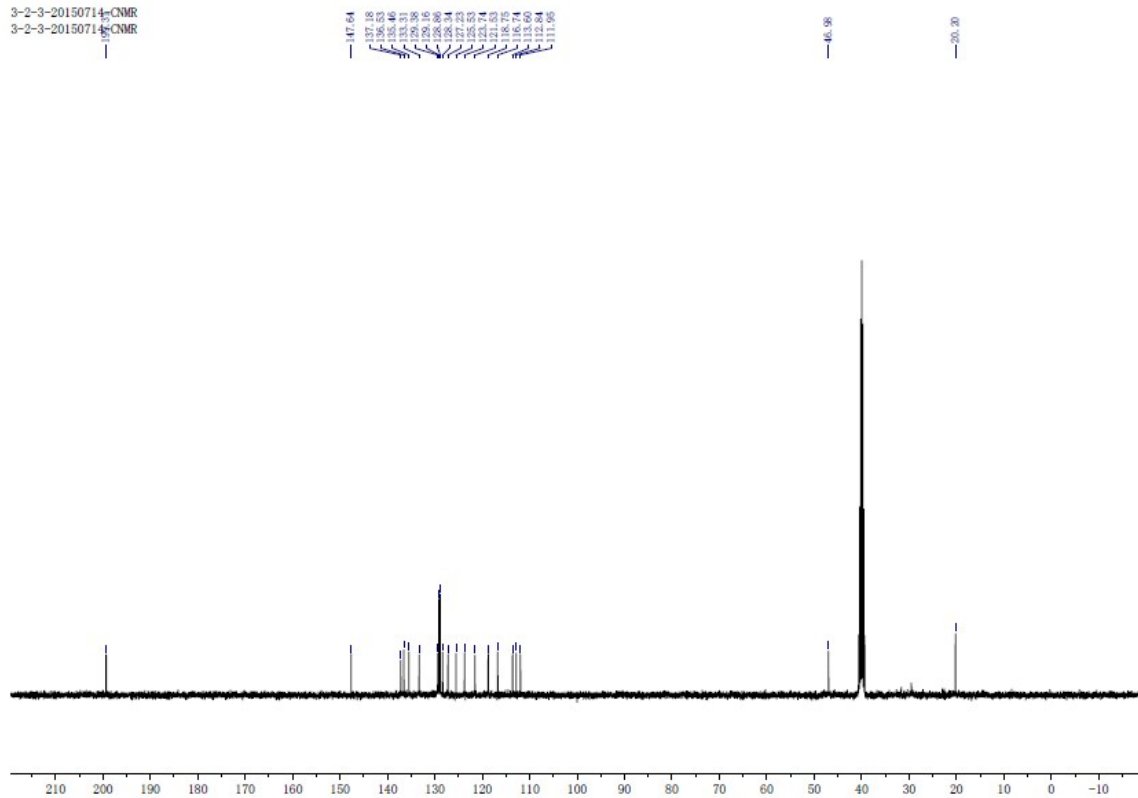

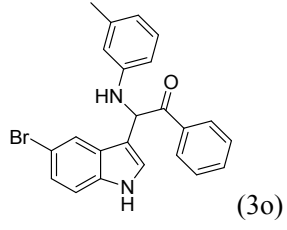

3-2-4-20150714-<sup>1</sup>H-NMR  
3-2-4-20150714-<sup>1</sup>H-NMR

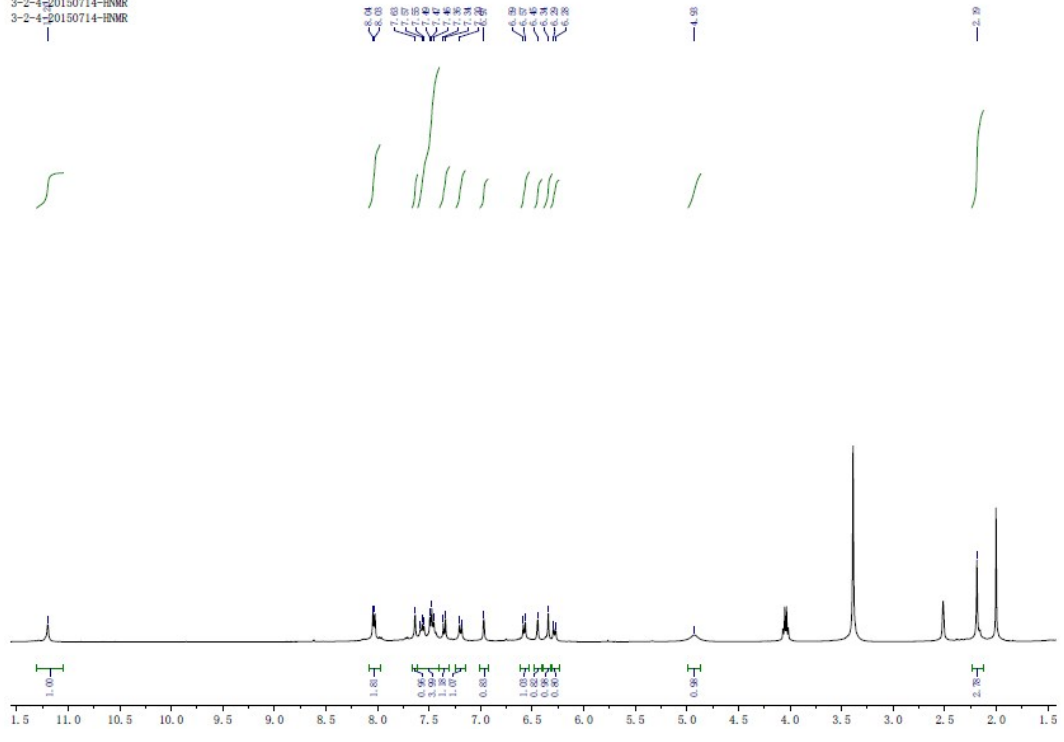

3-2-4-20150714-<sup>13</sup>C-NMR  
3-2-4-20150714-<sup>13</sup>C-NMR

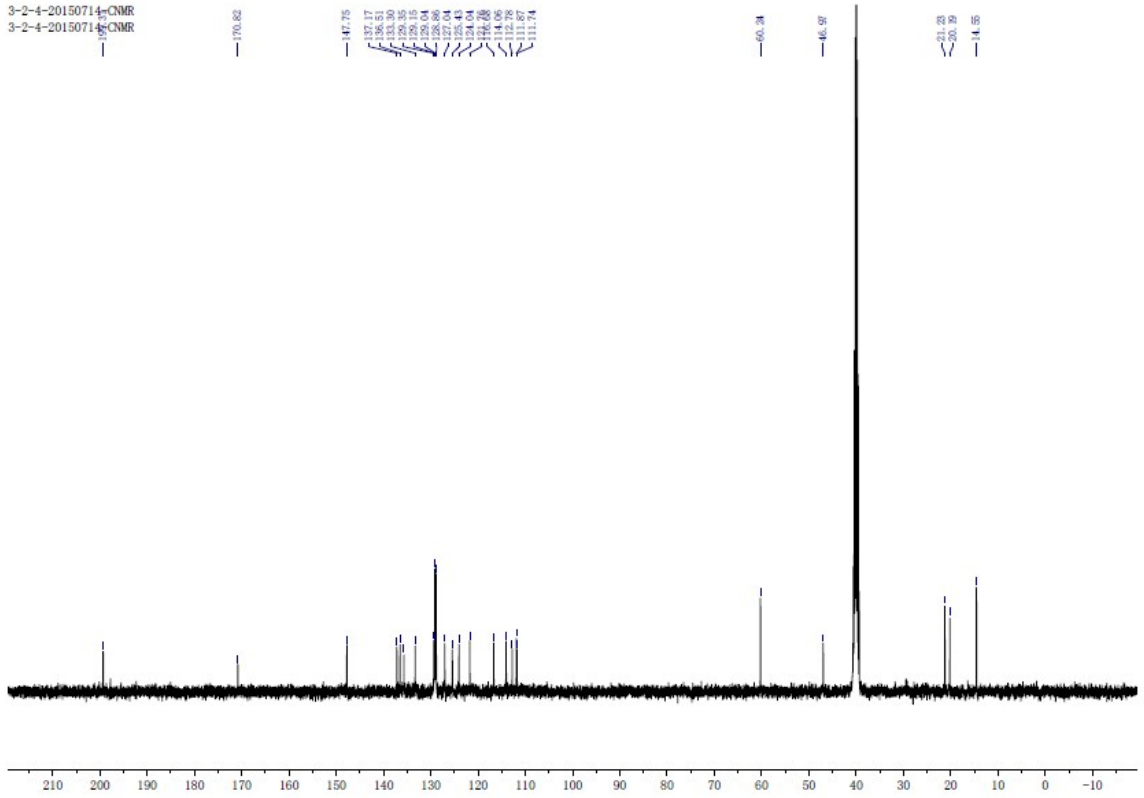

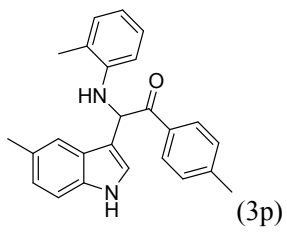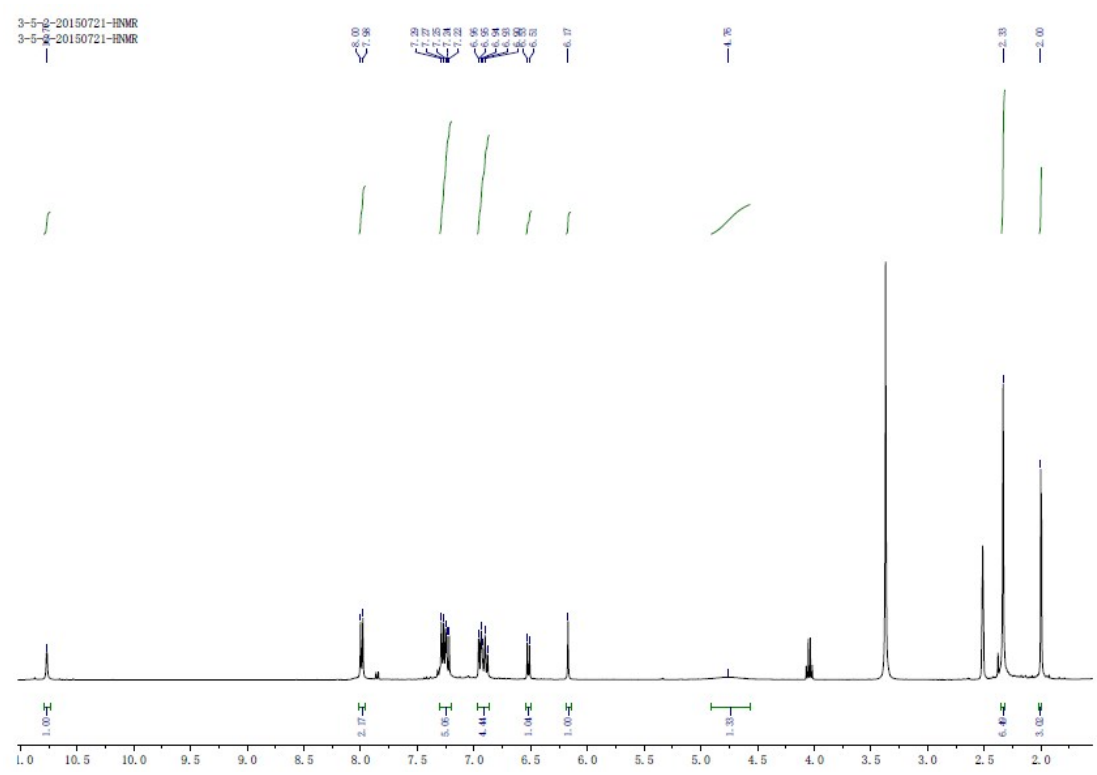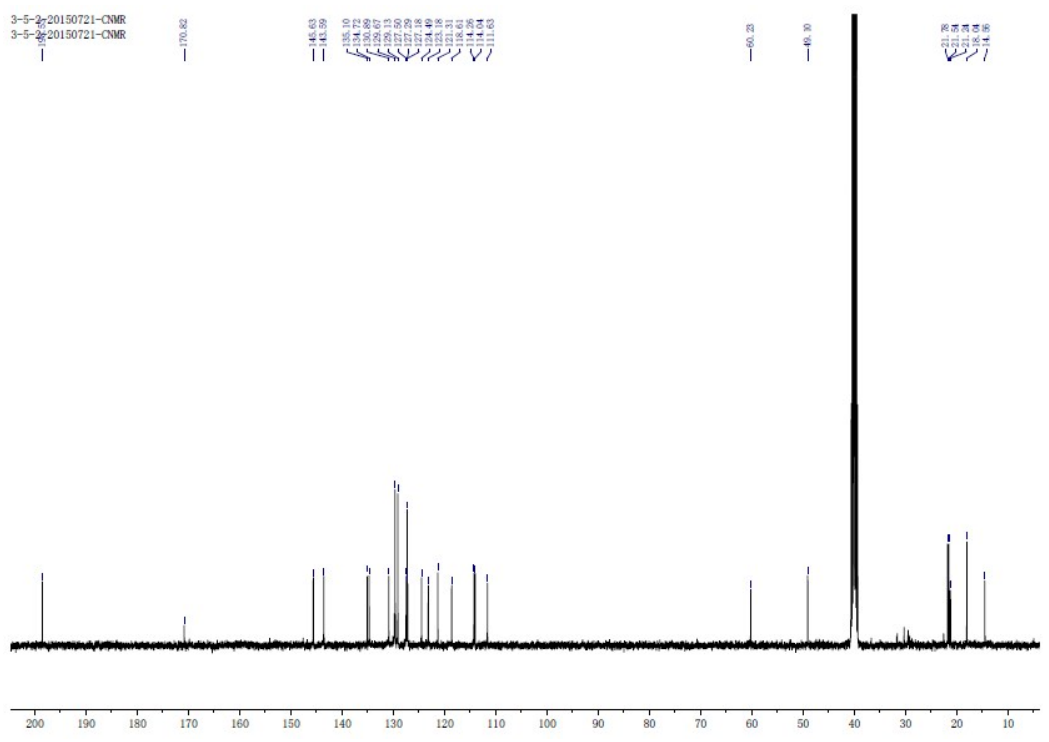

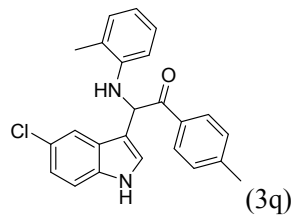

3-5-3-20150720-1H-NMR  
 3-5-3-20150720-1H-NMR

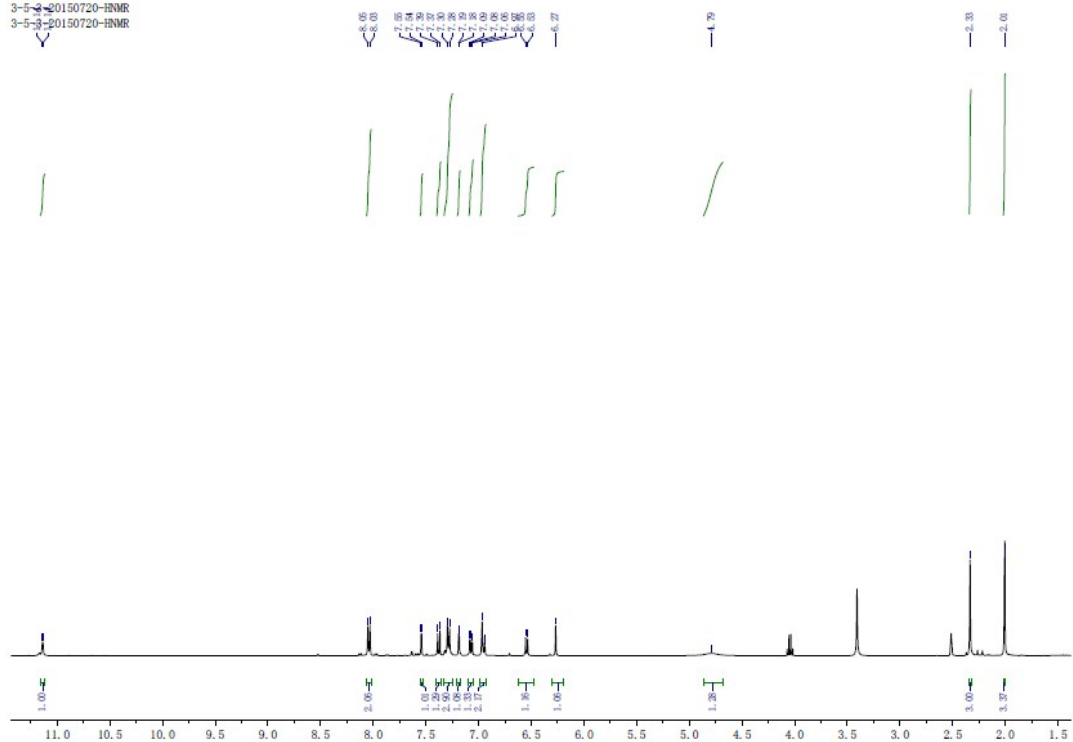

3-5-3-20150720-13C-NMR  
 3-5-3-20150720-13C-NMR

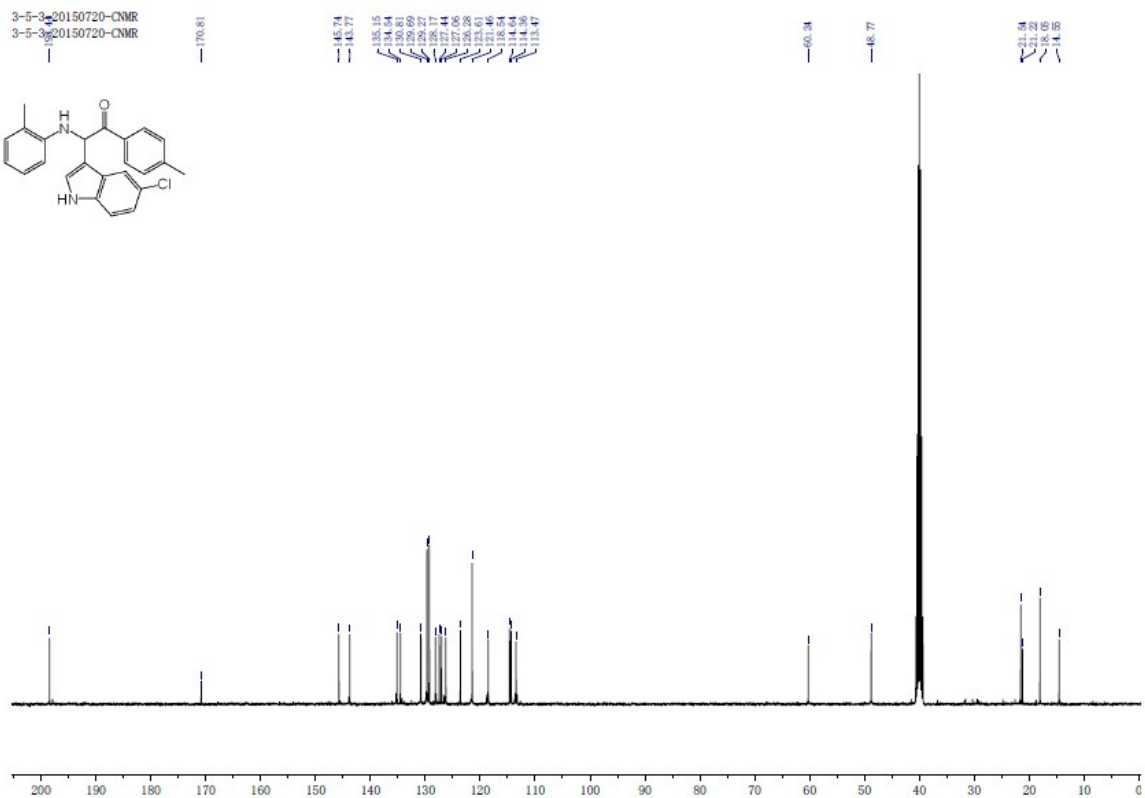



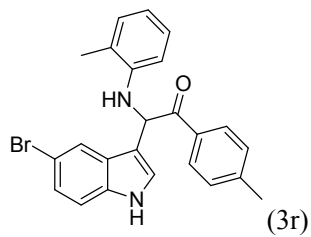

3-5-4-20150720-1H-NMR  
3-5-4-20150720-1H-NMR

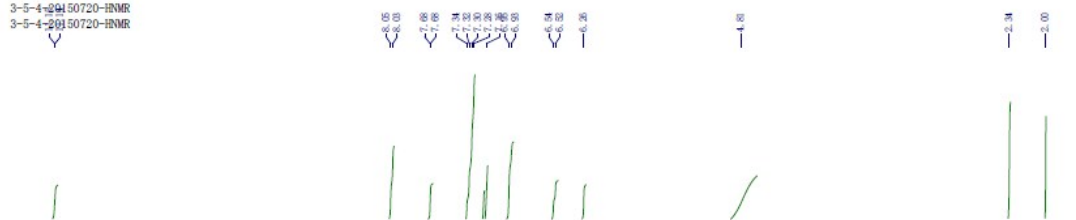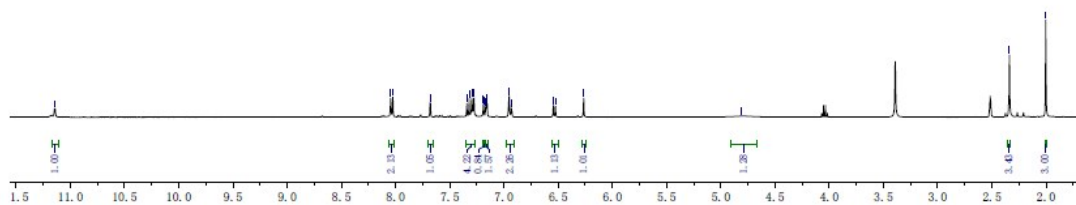

3-5-4-20150720-13C-NMR  
3-5-4-20150720-13C-NMR

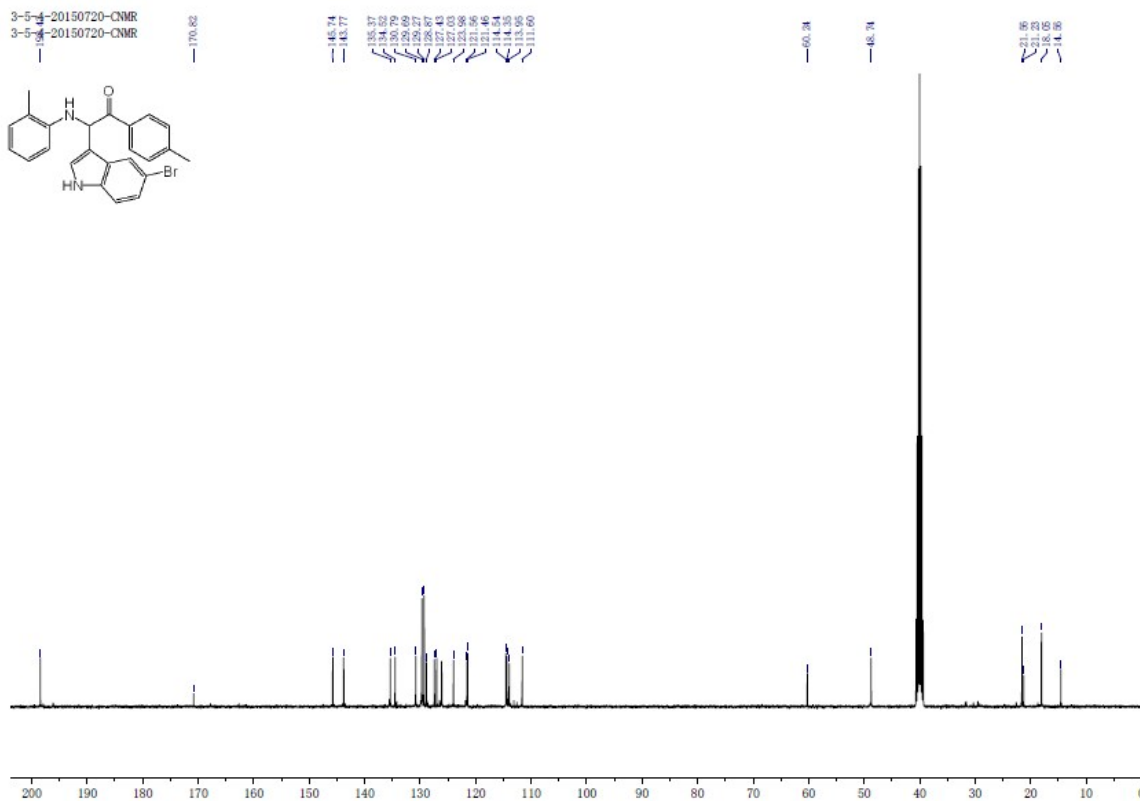

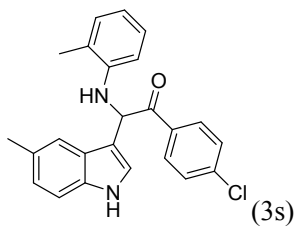

3-6-2-20150723-1HMR

3-6-2-20150723-1HMR

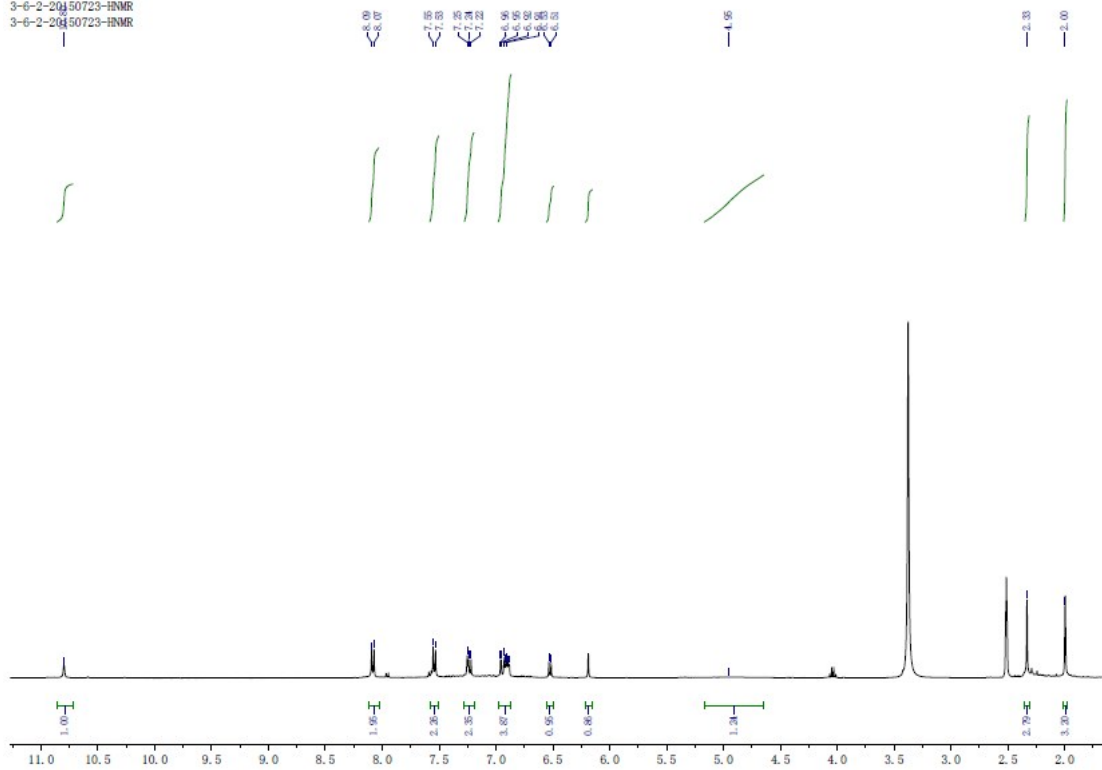

3-6-2-20150723-CNMR

3-6-2-20150723-CNMR

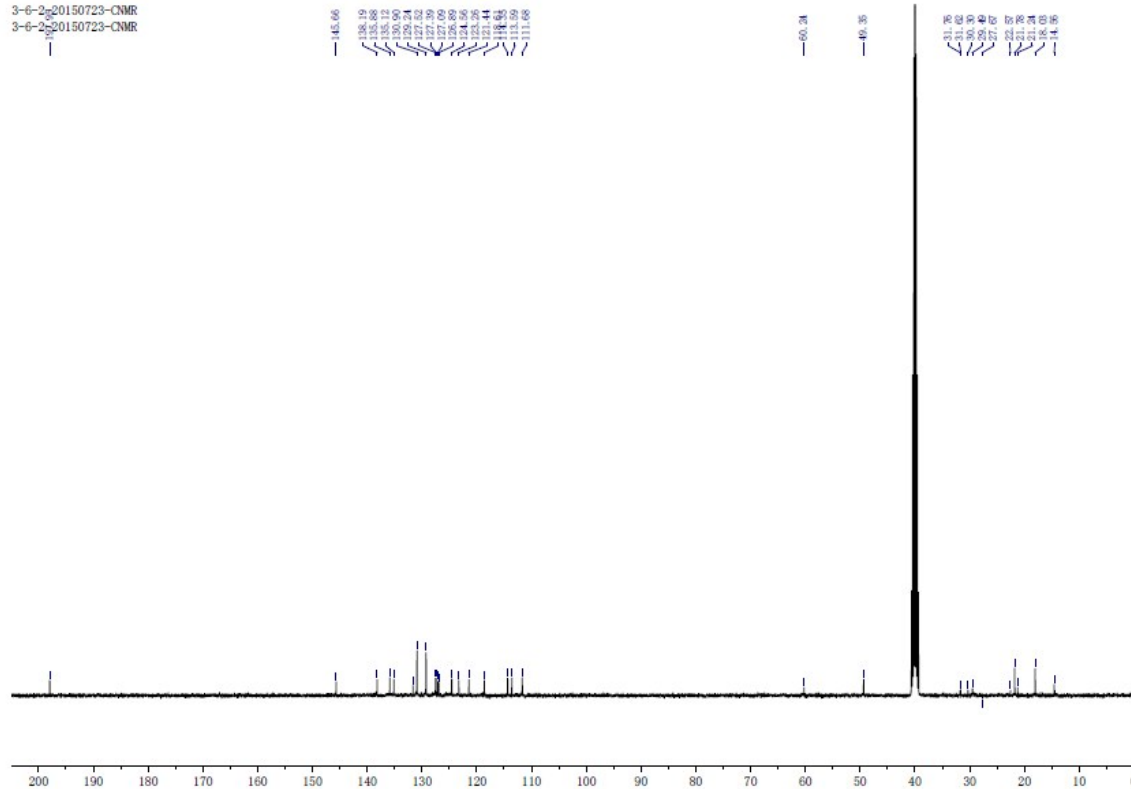

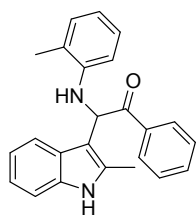

(3t)

3-4-7-20150909-HMR  
3-4-7-20150909-HMR

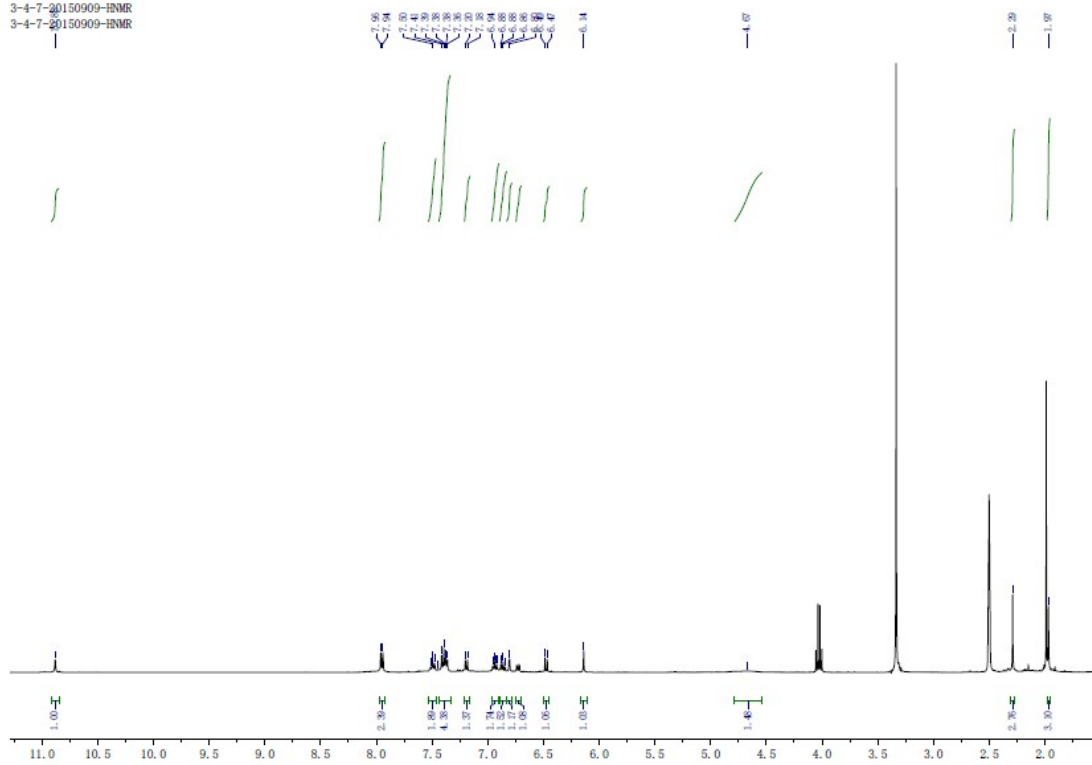

3-4-7-20150911-CNMR  
3-4-7-20150911-CNMR

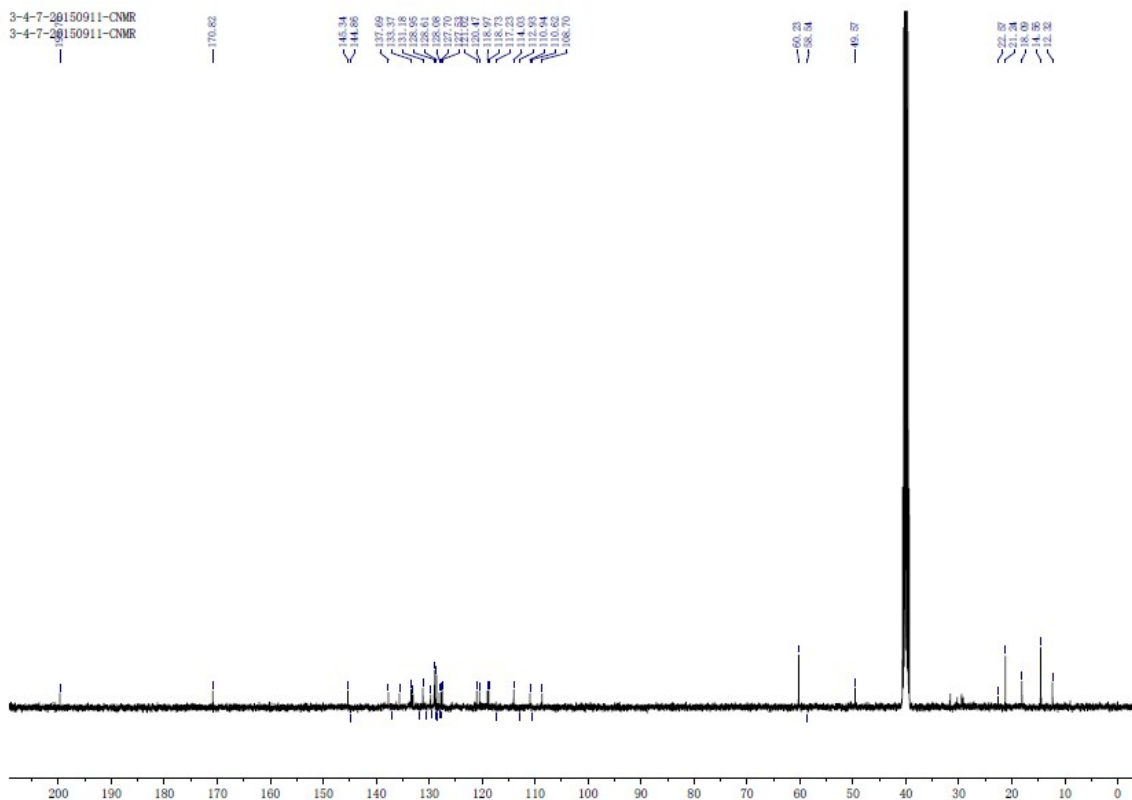

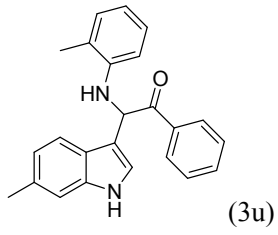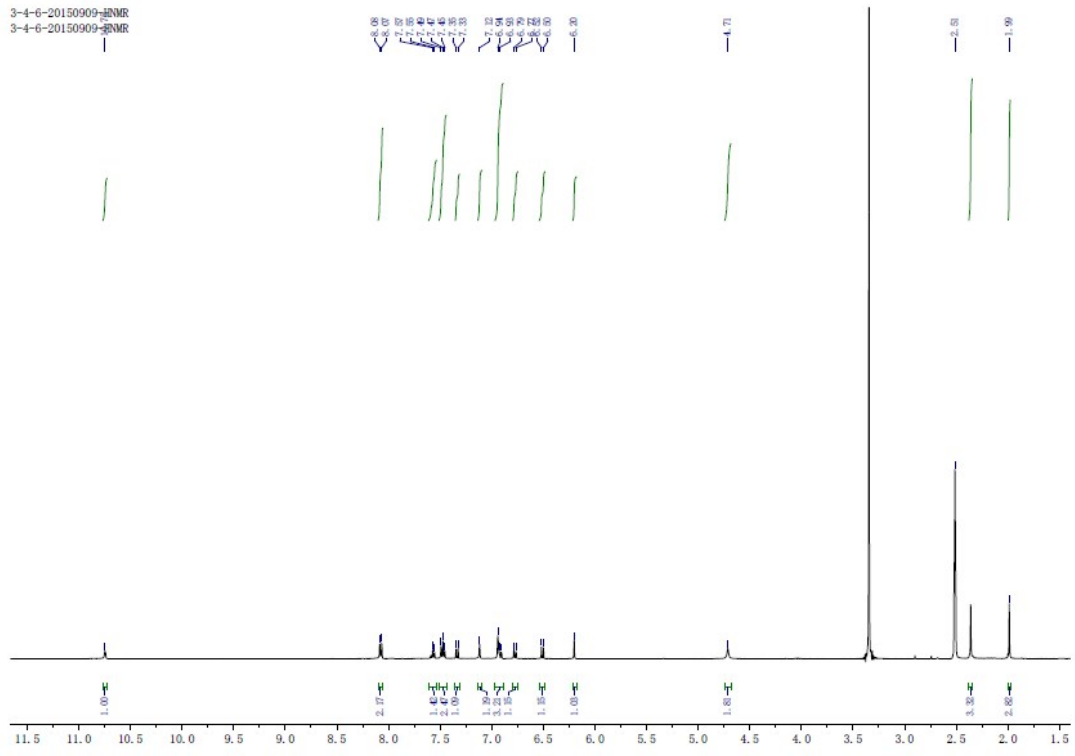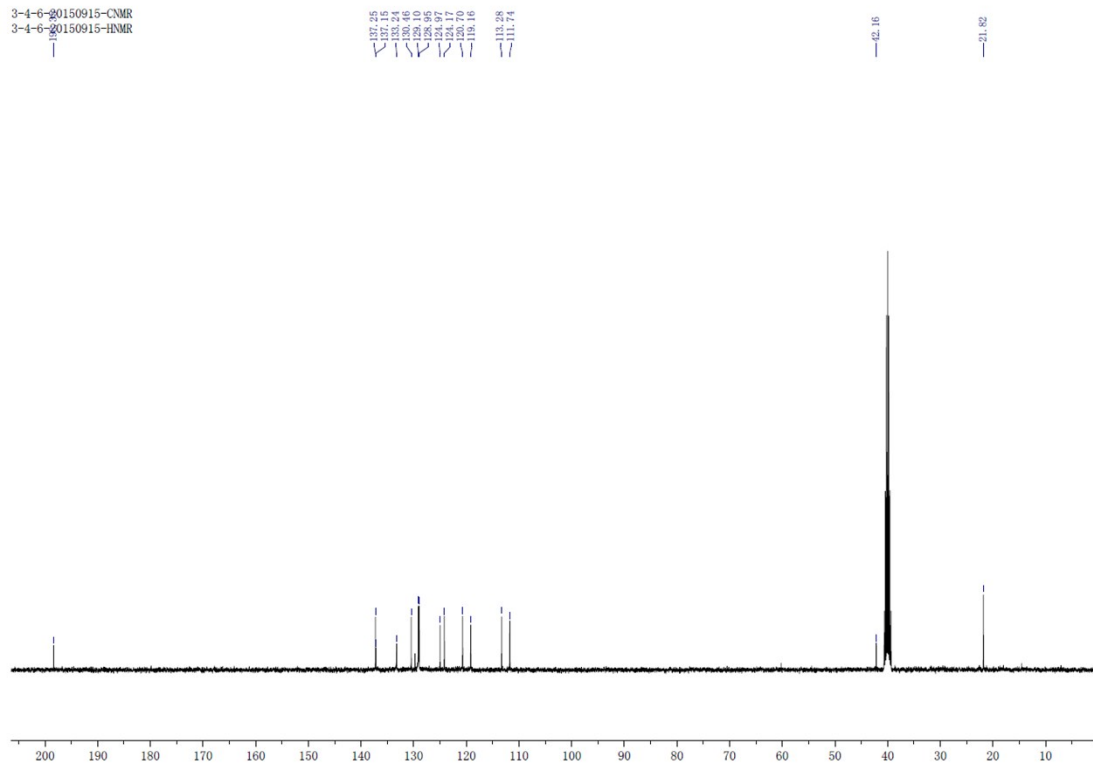

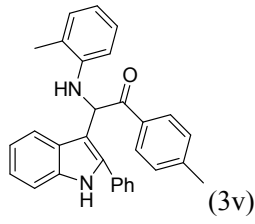

3-5-5-20150730-<sup>1</sup>H-NMR  
3-5-5-20150730-<sup>1</sup>H-NMR

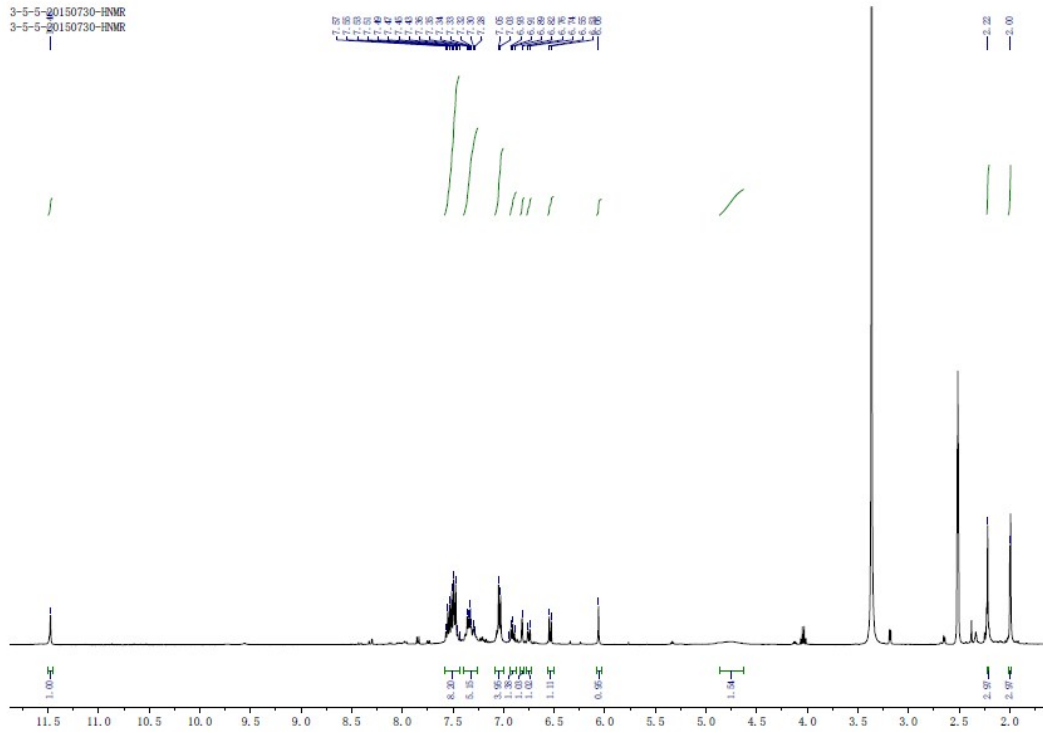

3-5-5-20150914-<sup>13</sup>C-NMR  
3-5-5-20150914-<sup>13</sup>C-NMR

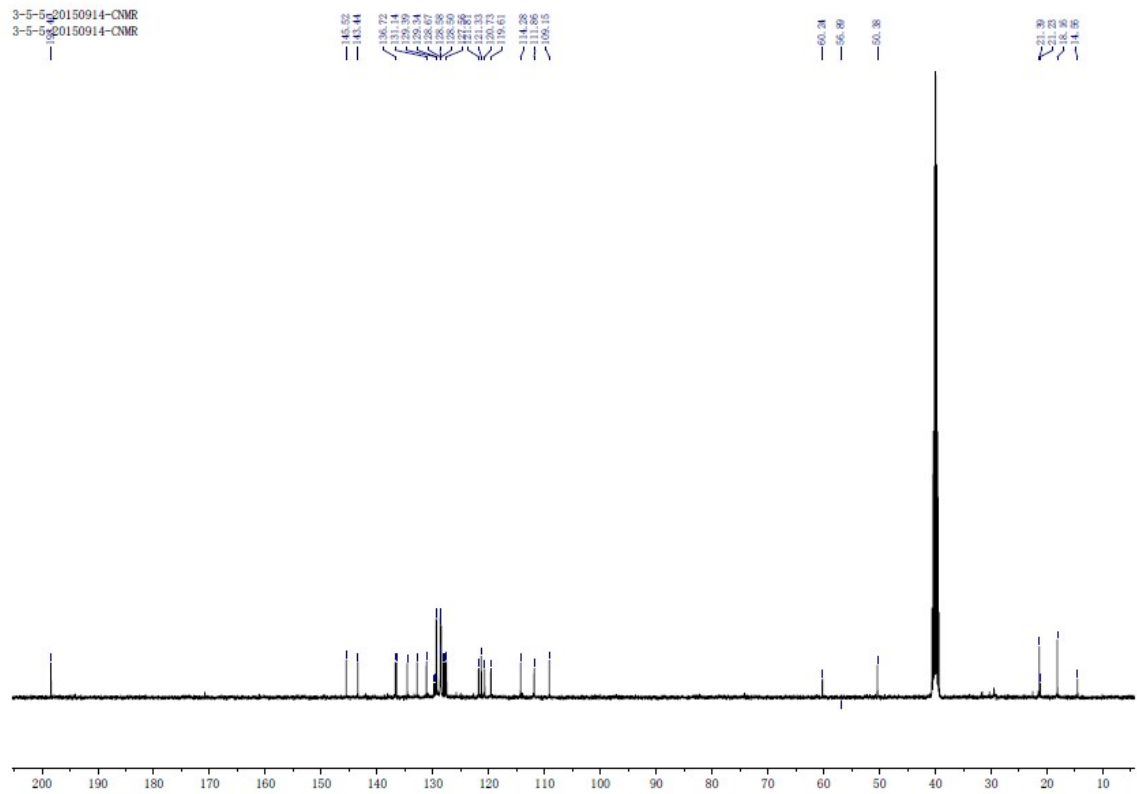

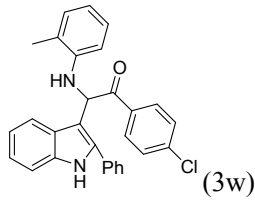

3-6-5-20150730-<sup>1</sup>H-NMR  
 3-6-5-20150730-<sup>1</sup>H-NMR

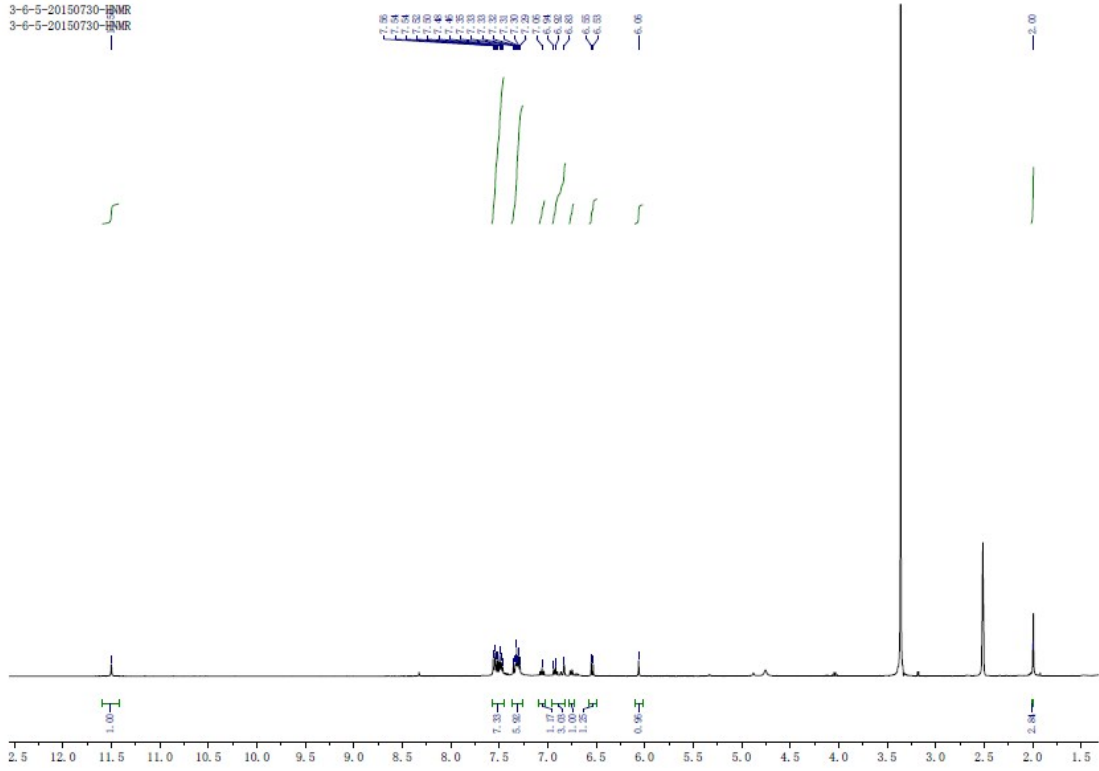

3-6-3-20151008-<sup>13</sup>C-NMR  
 3-6-3-20151008-<sup>13</sup>C-NMR

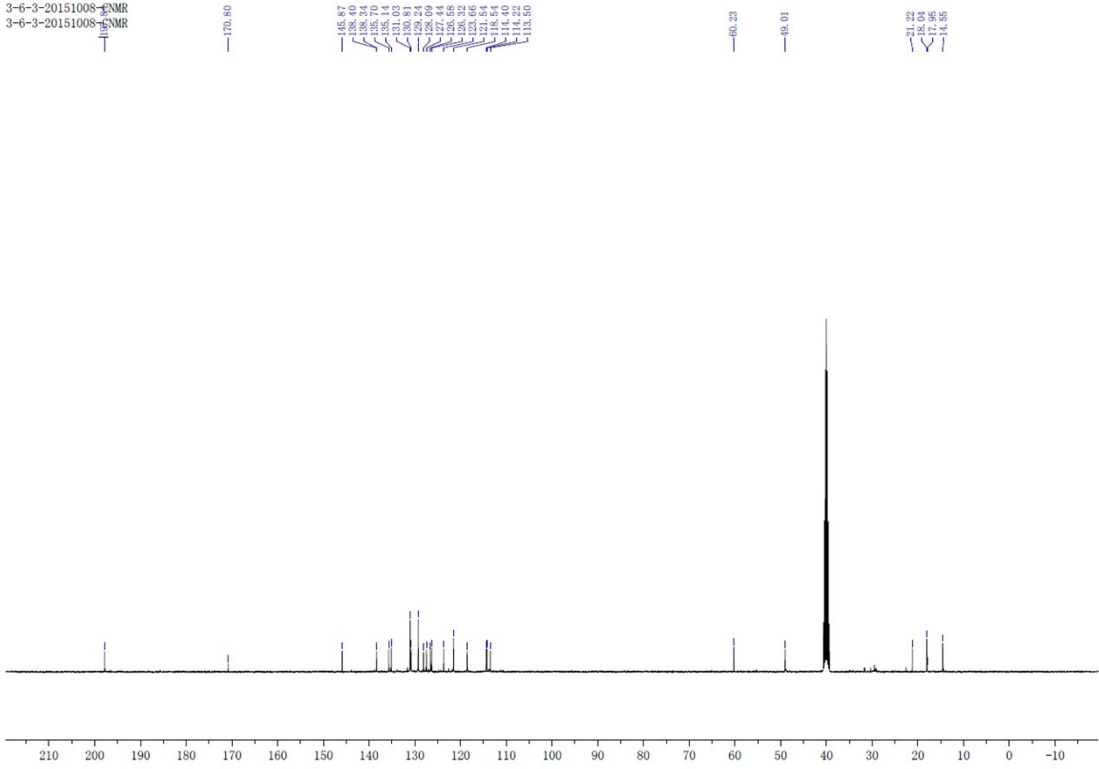

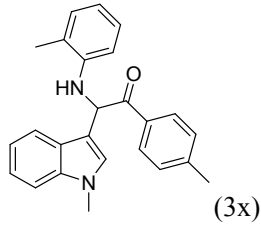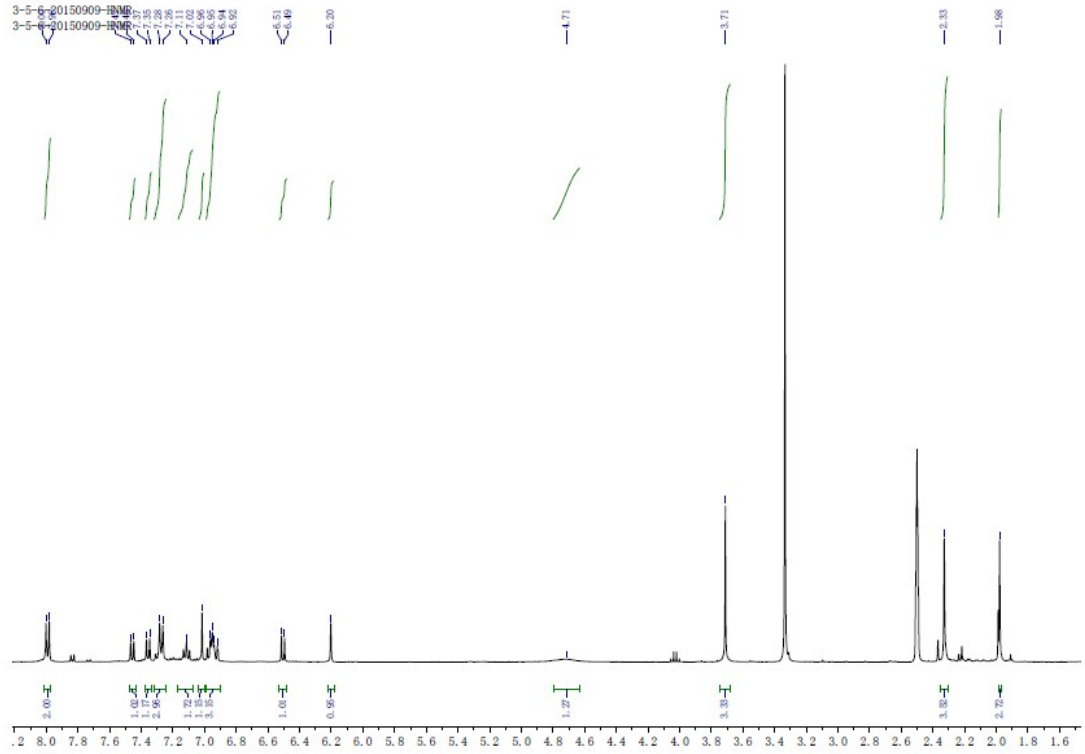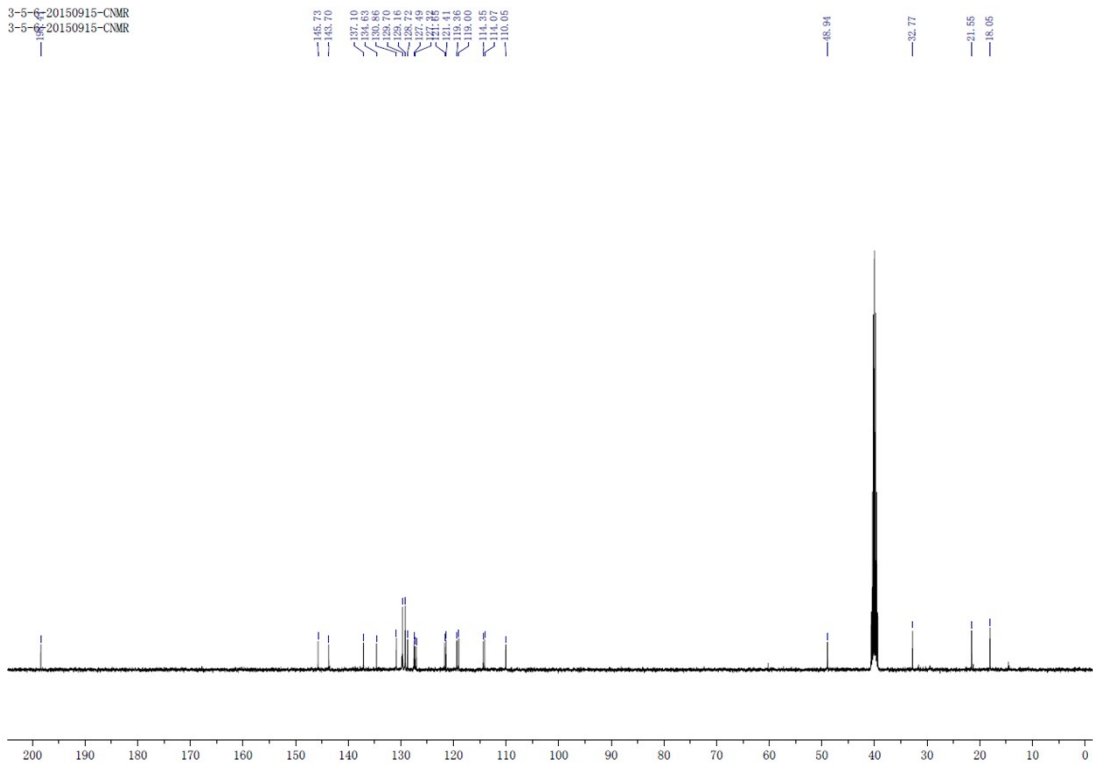

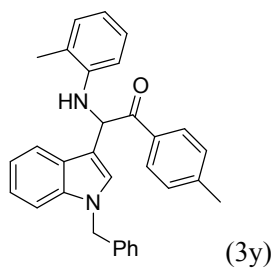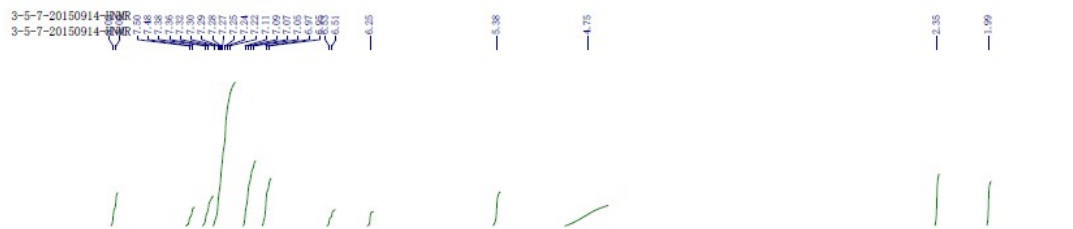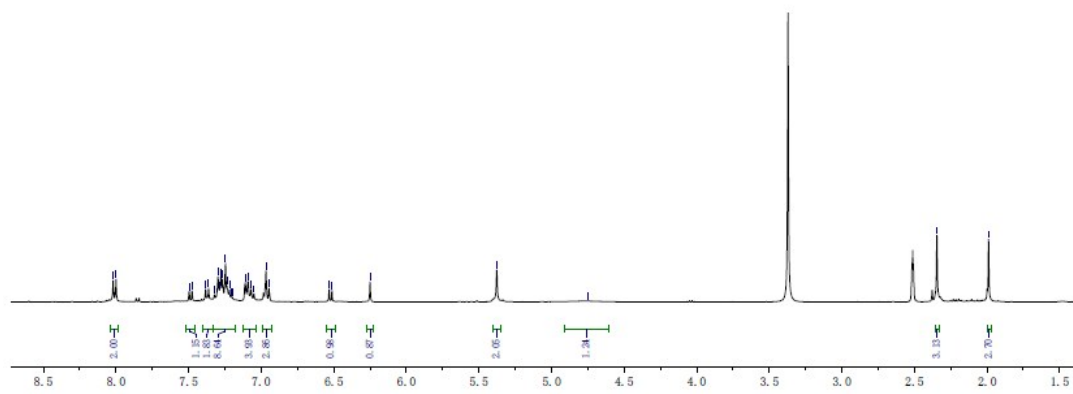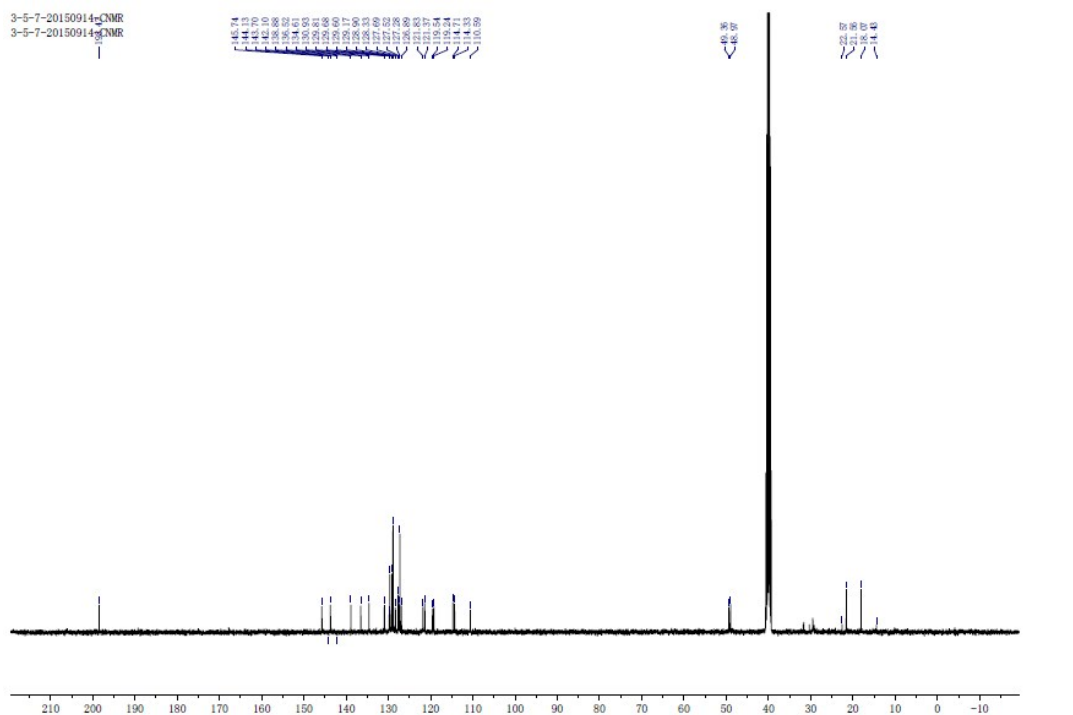



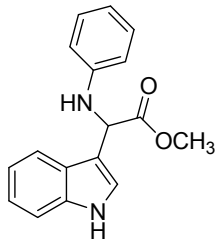

3-9-1-20151221-HNMR  
3-9-1-20151221-HNMR

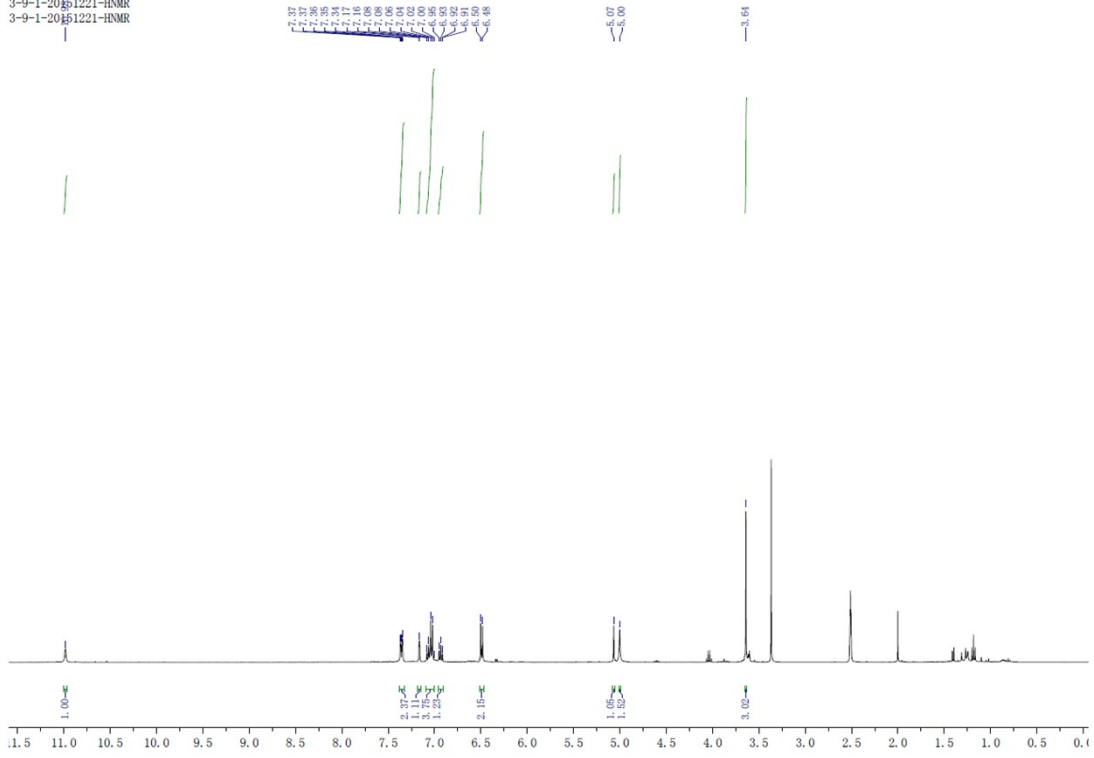

3-9-1-20151221-CNMR

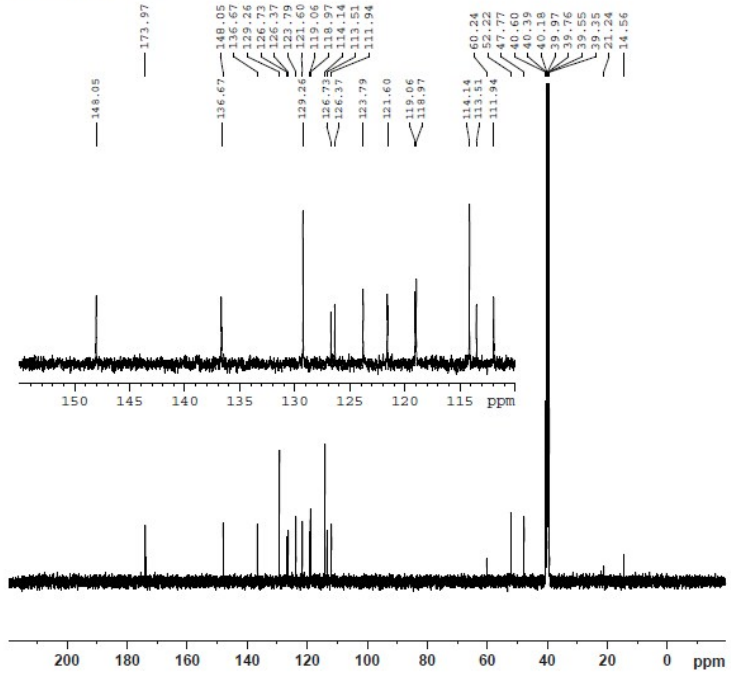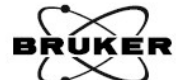

```

NAME      3-9-1-20151221-CNMR
EXPNO     1
PROCNO    1
Date_     20151221
Time      15.58
INSTRUM   spect
PROBHD    5 mm PABBO BB-
PULPROG   zgpg30
TD         65536
SOLVENT   DMSO
NS         256
DS         4
SWH        24038.461 Hz
FIDRES     0.366798 Hz
AQ         1.3623988 sec
RG         203
EW         20.800 usec
DE         6.50 usec
TE         295.1 K
D1         2.00000000 sec
D11        0.03000000 sec
TD0        1

----- CHANNEL f1 -----
NUC1      13C
P1         11.92 usec
PL1        -0.20 dB
PL1W       38.13888550 W
SFO1      100.6279773 MHz

----- CHANNEL f2 -----
CPDPRG2   waltz16
NUC2       1H
PCPD2     80.00 usec
PL2         0.50 dB
PL12       14.45 dB
PL13       15.52 dB
PL1W       9.73843670 W
PL12W     0.39218345 W
PL13W     0.30654144 W
SFO2      400.2316009 MHz
SI         32768
SF         100.6279140 MHz
WDW        EM
SSB         0
LB         1.00 Hz
GB         0
PC         1.40
  
```

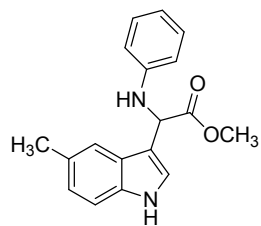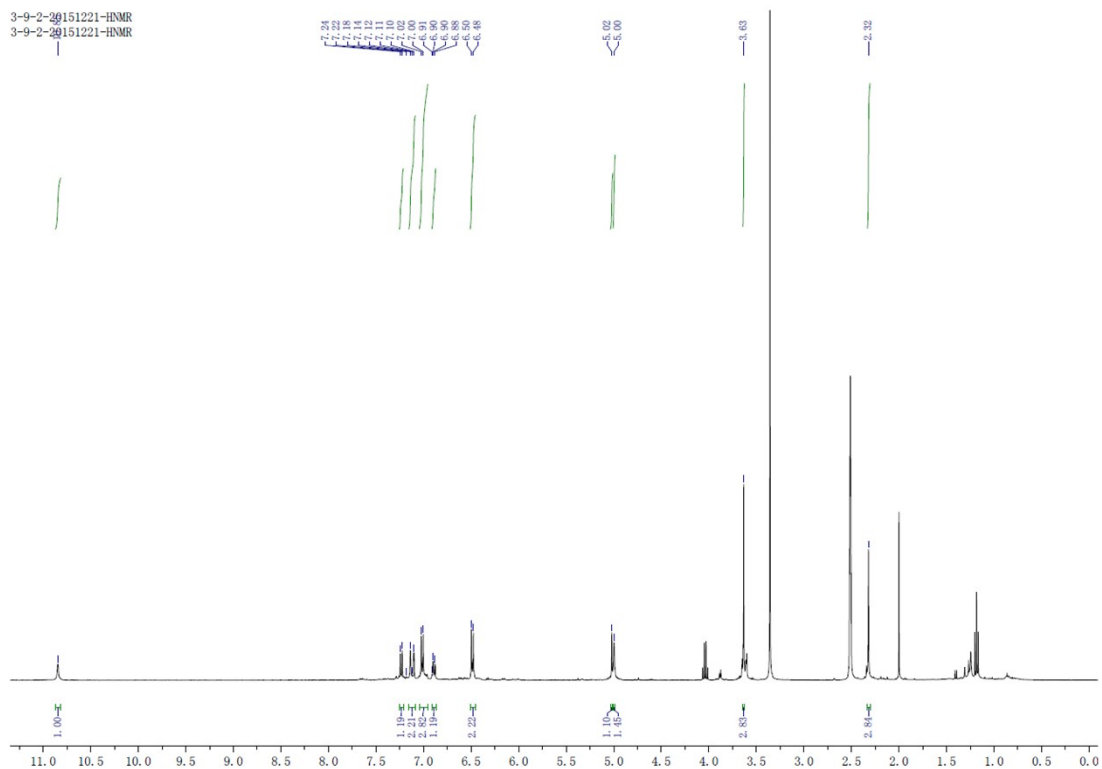

3-9-2-20151221-CNMR

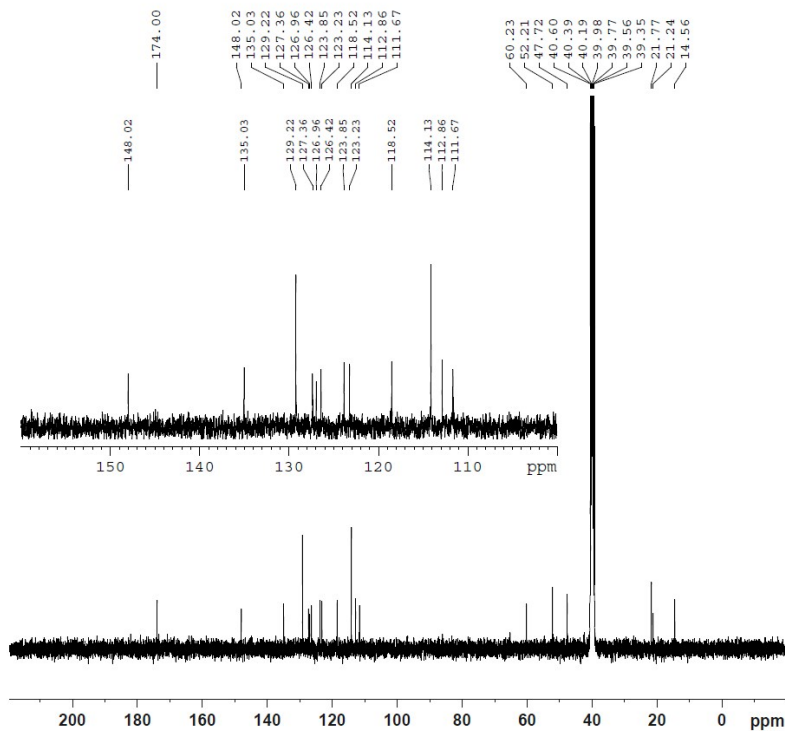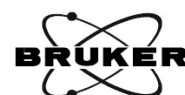

```

NAME      3-9-2-20151221-CNMR
EXPNO     1
PROCNO    1
Date_     20151221
Time      14.37
INSTRUM   spect
PROBHD    5 mm PABBO BB-
PULPROG   zgpg30
TD        65536
SOLVENT   DMSO
NS         1024
DS         4
SWH        24038.461 Hz
FIDRES     0.366798 Hz
AQ         1.3631988 sec
RG         203
DW         20.800 usec
DE         6.50 usec
TE         295.2 K
D1         2.00000000 sec
D11        0.03000000 sec
TDO        1

===== CHANNEL f1 =====
NUC1       13C
P1         11.92 usec
PL1        -0.20 dB
PL1W       38.13888550 W
SF01       100.6479773 MHz

===== CHANNEL f2 =====
CPDPRG2   waltz16
NUC2       1H
PCPD2     80.00 usec
PL2        0.50 dB
PL12       14.45 dB
PL13       15.52 dB
PL2W       9.73843670 W
PL12W      0.39218345 W
PL13W      0.30654144 W
SF02       400.2316009 MHz
SI         32768
SF         100.6379140 MHz
WDW        EM
SSB        0
LB         1.00 Hz
GB         0
PC         1.40
  
```

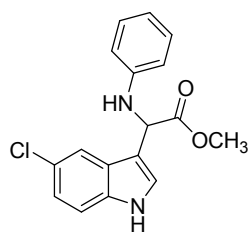

(3bb)

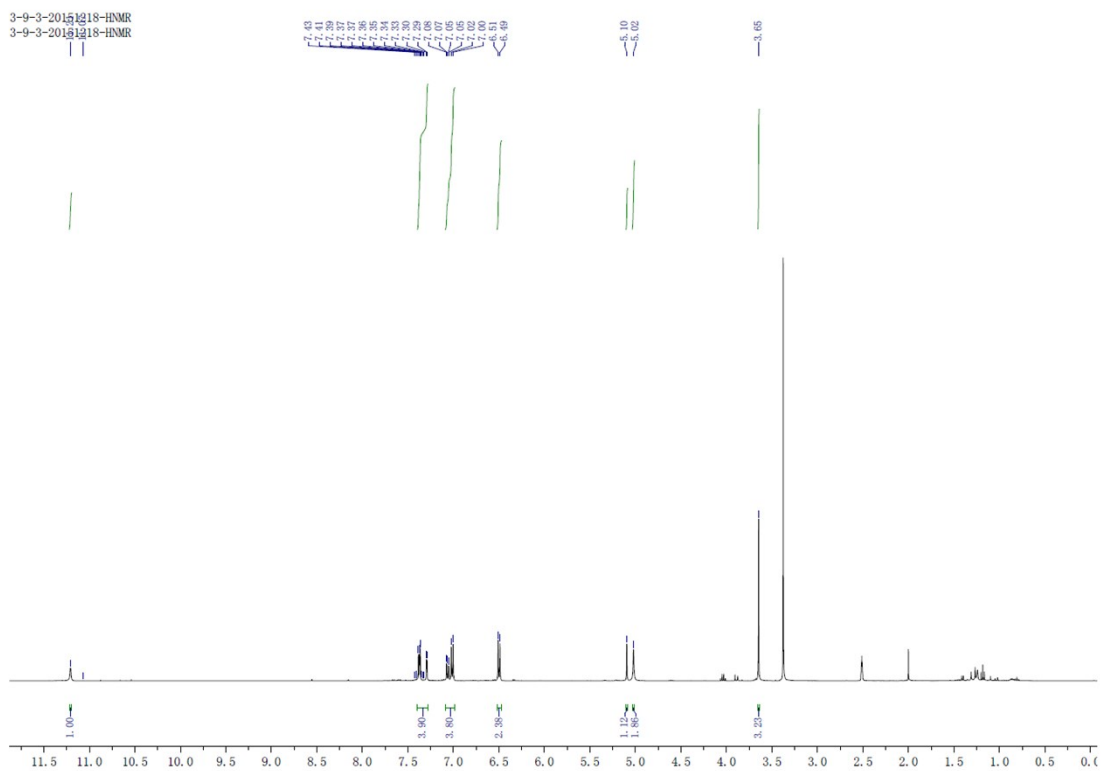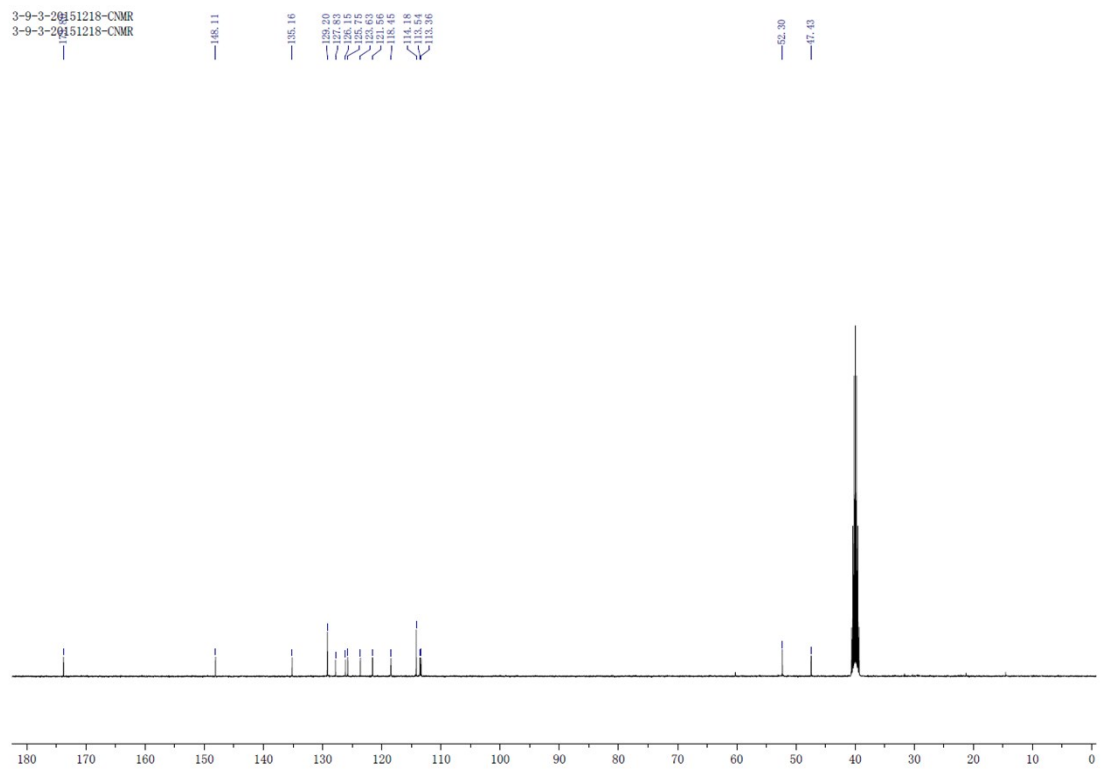

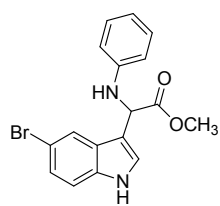

(3cc)

3-9-4-20151218-HMR  
3-9-4-20151218-HMR

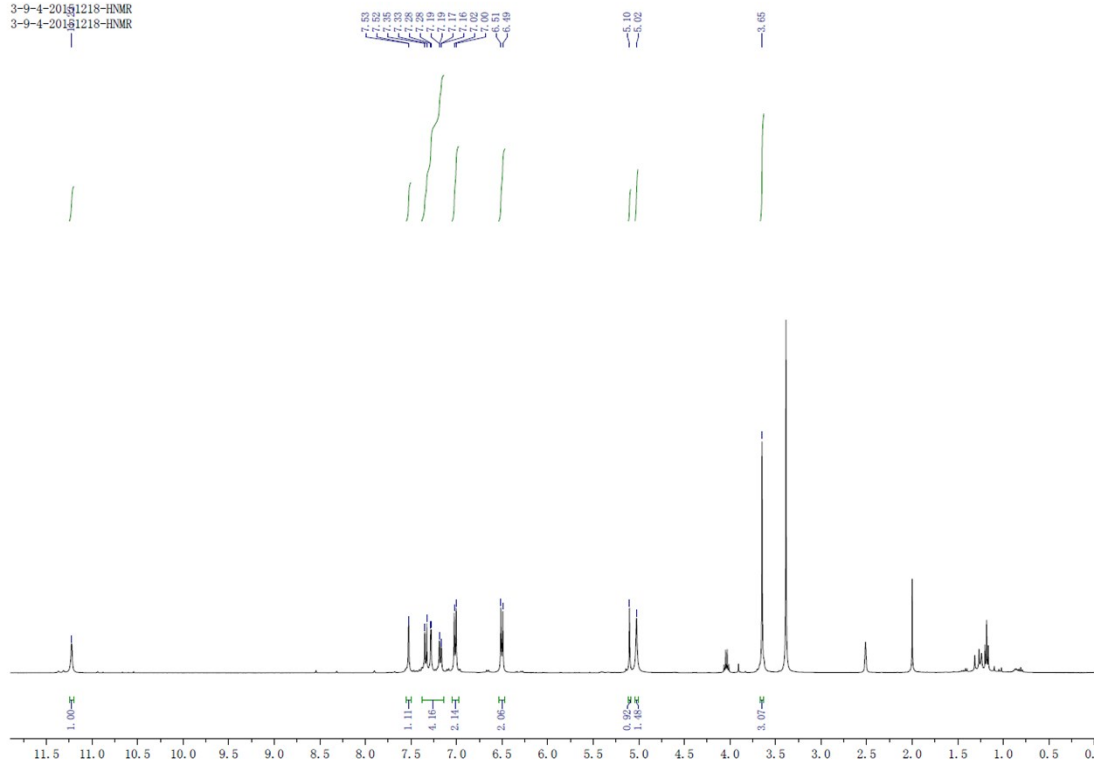

3-9-4-20151218-CNMR  
3-9-4-20151218-CNMR

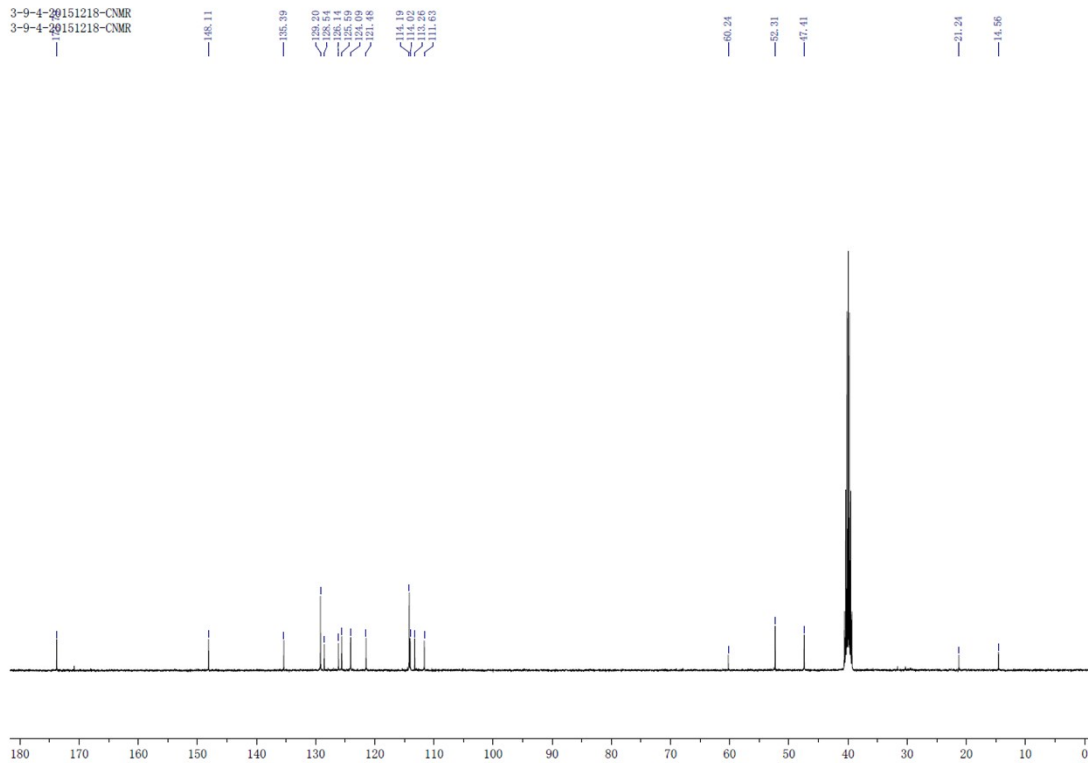

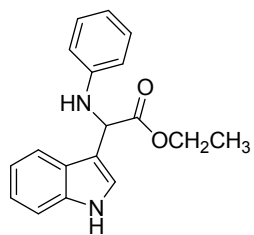

(3dd)

3-10-1-20151216-1H-NMR  
3-10-1-20151216-1H-NMR

7.43  
7.38  
7.20  
7.12  
7.10  
7.09  
6.99  
6.97  
6.84  
6.82  
4.07  
4.19  
4.18  
4.17  
4.17  
4.15  
4.14  
4.12  
4.11  
1.00  
1.23  
1.22  
1.20

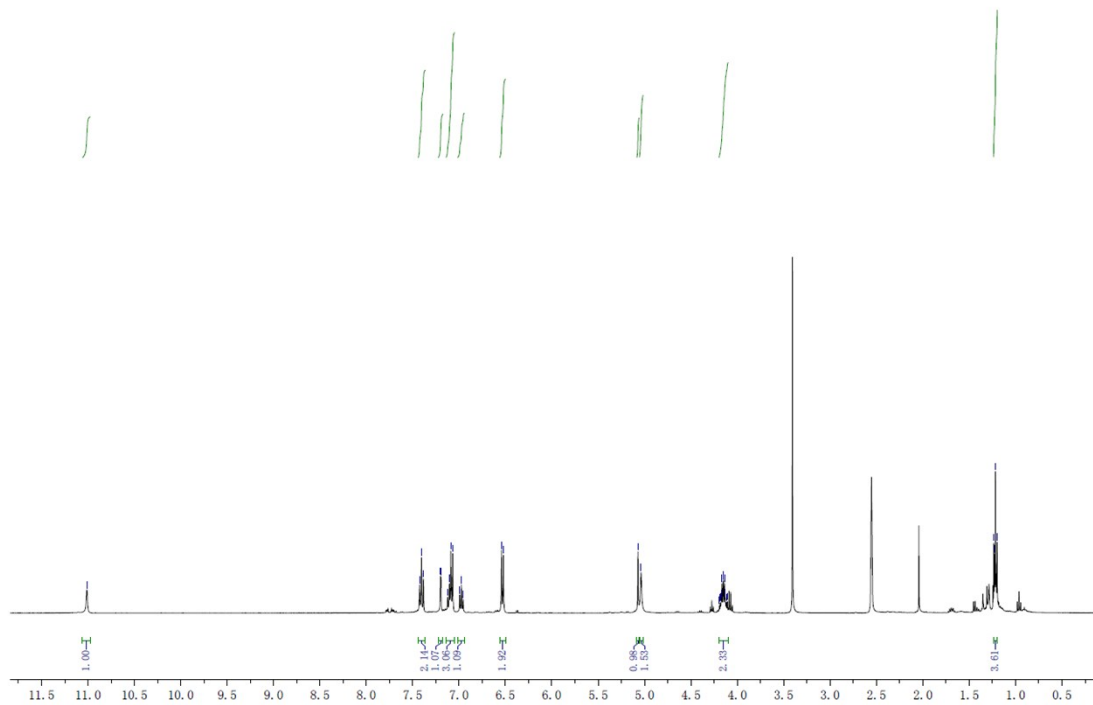

3-10-1-20151216-CNMR  
3-10-1-20151216-CNMR

173.43  
168.00  
136.68  
129.23  
128.75  
128.45  
121.59  
118.10  
114.14  
113.63  
111.94  
60.71  
47.90  
14.56

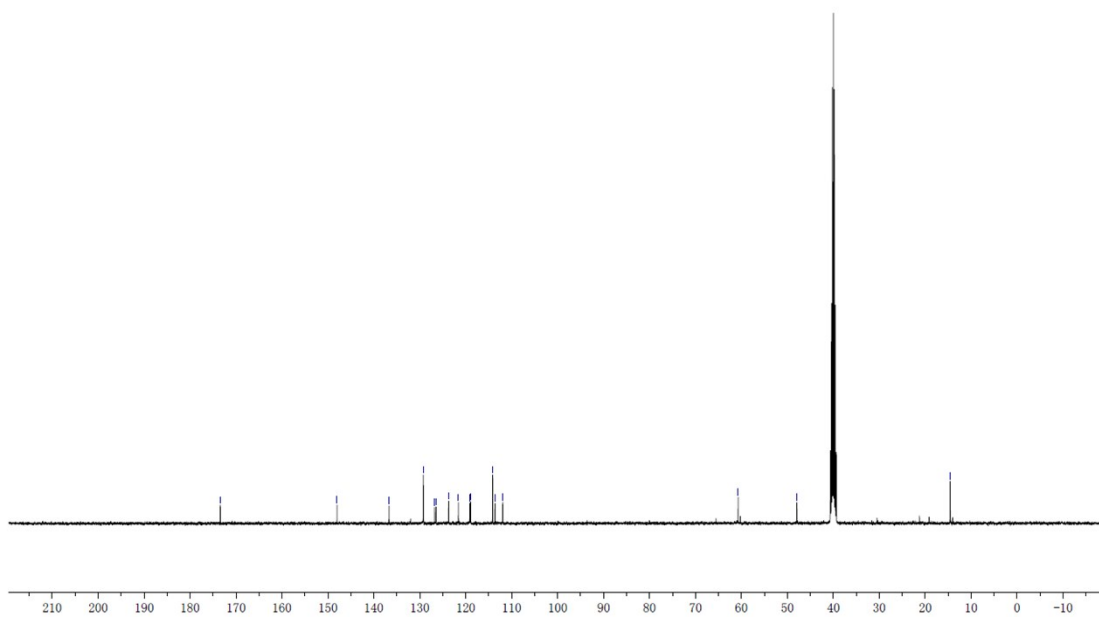

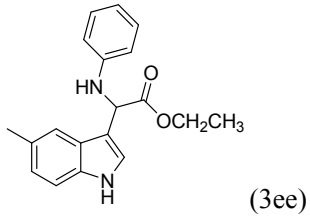

3-10-2-20151217-HNMR  
3-10-2-20151217-HNMR

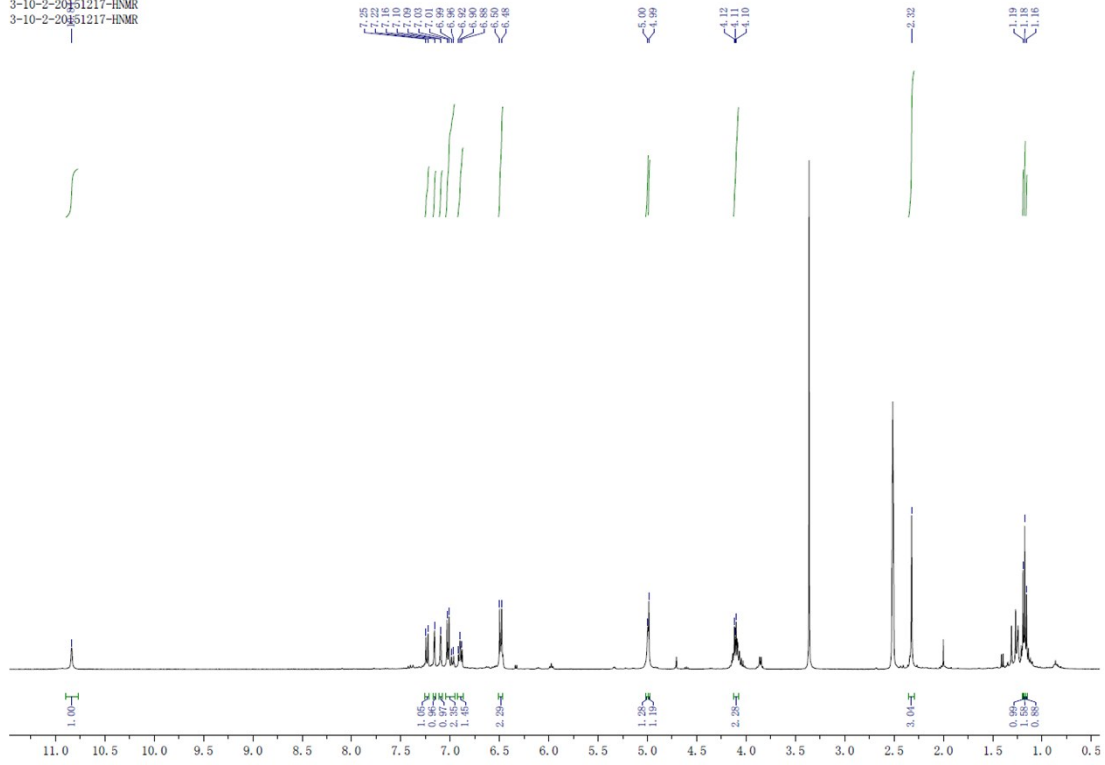

3-10-2-20151217-CNMR  
3-10-2-20151217-CNMR

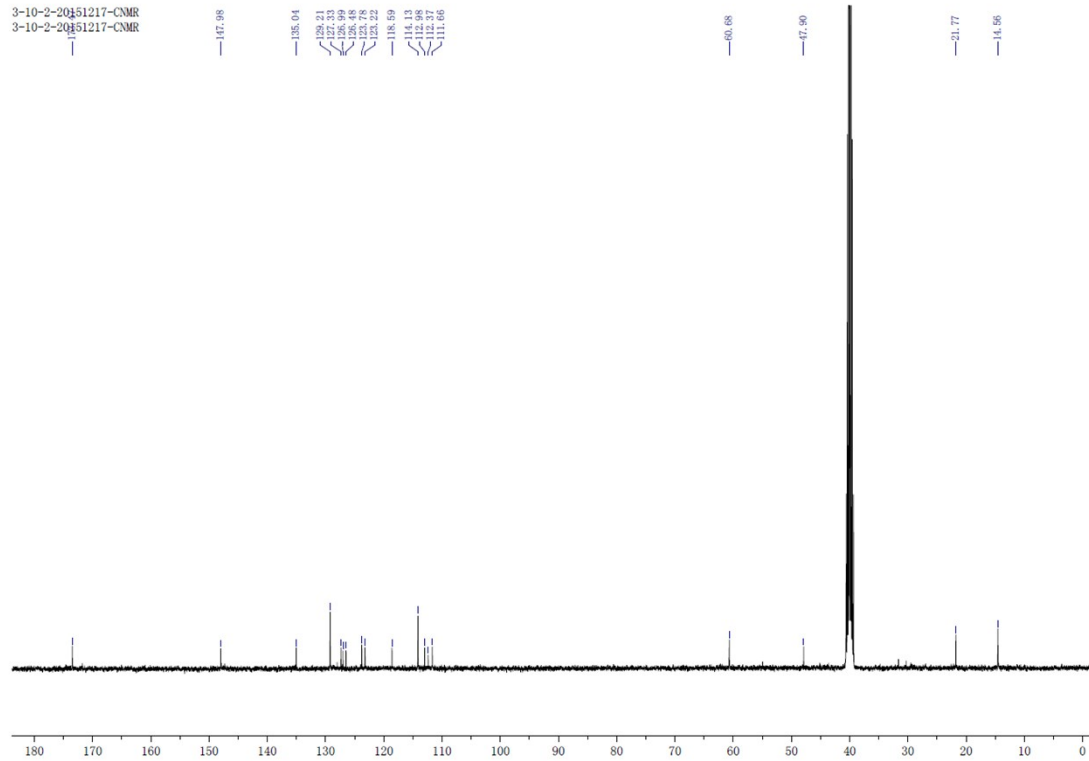

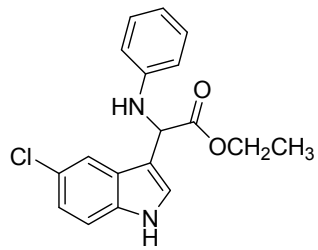

3-10-3-20151217-HNMR  
 3-10-3-20151217-HNMR

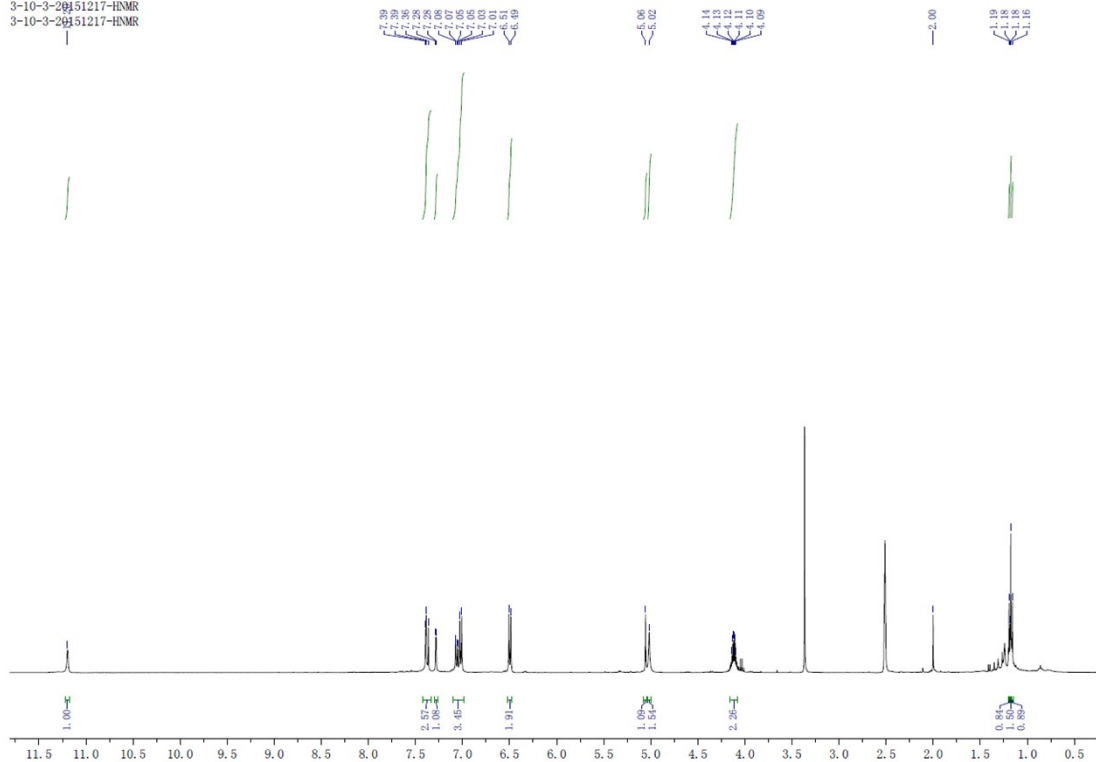

3-10-3-20151217-CNMR  
 3-10-3-20151217-CNMR

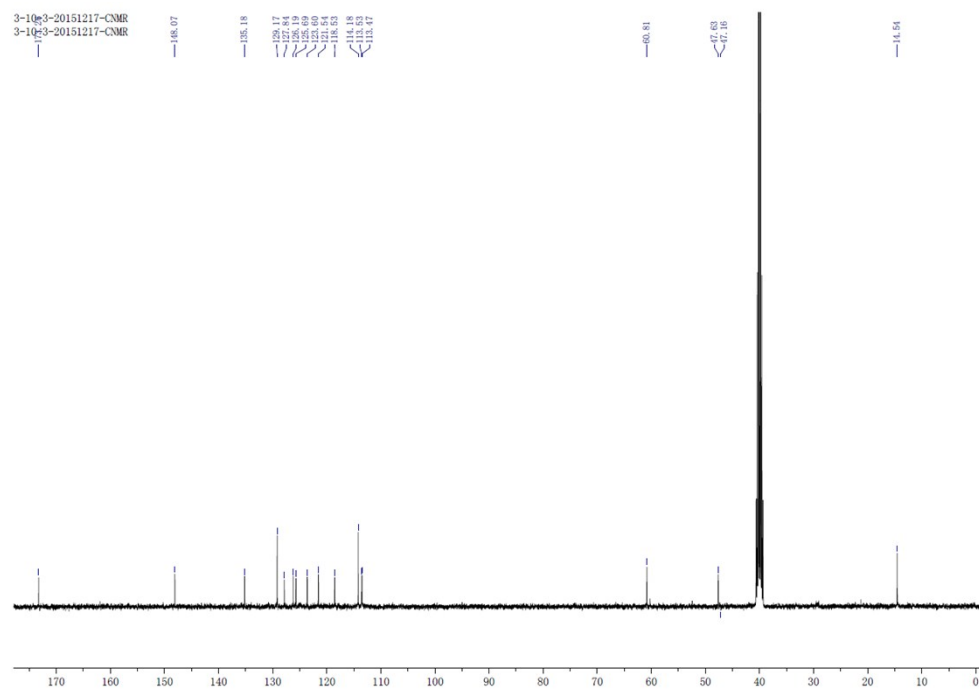

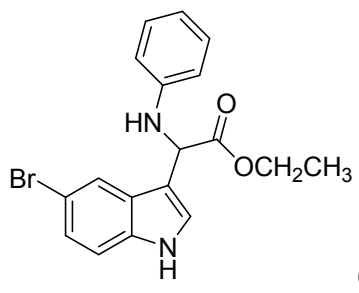

3-10-4-20151217-HMR  
 3-10-4-20151217-HMR

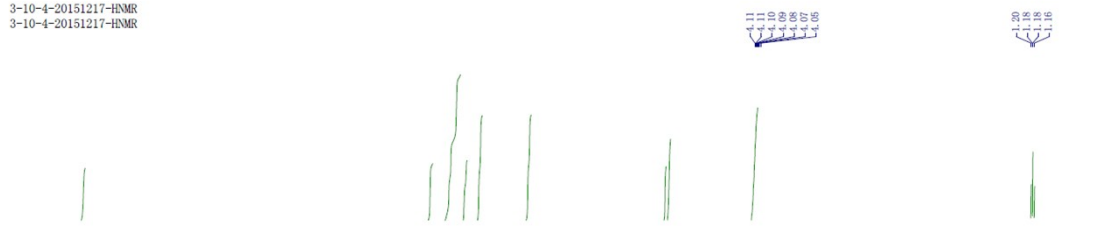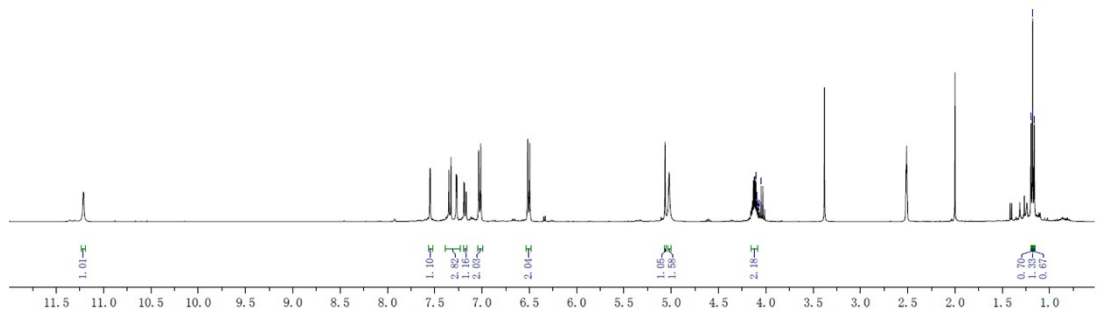

3-10-4-20151217-CMR  
 3-10-4-20151217-CMR

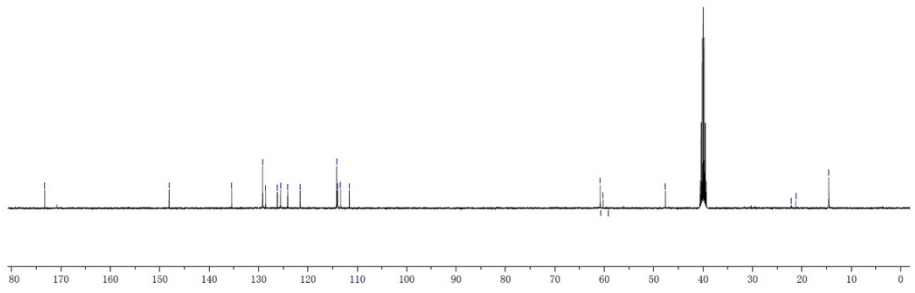



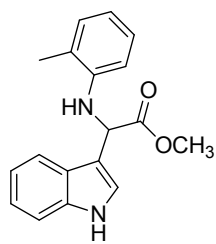

(3h)

3-12-1-20151218-HNMR  
3-12-1-20151218-HNMR

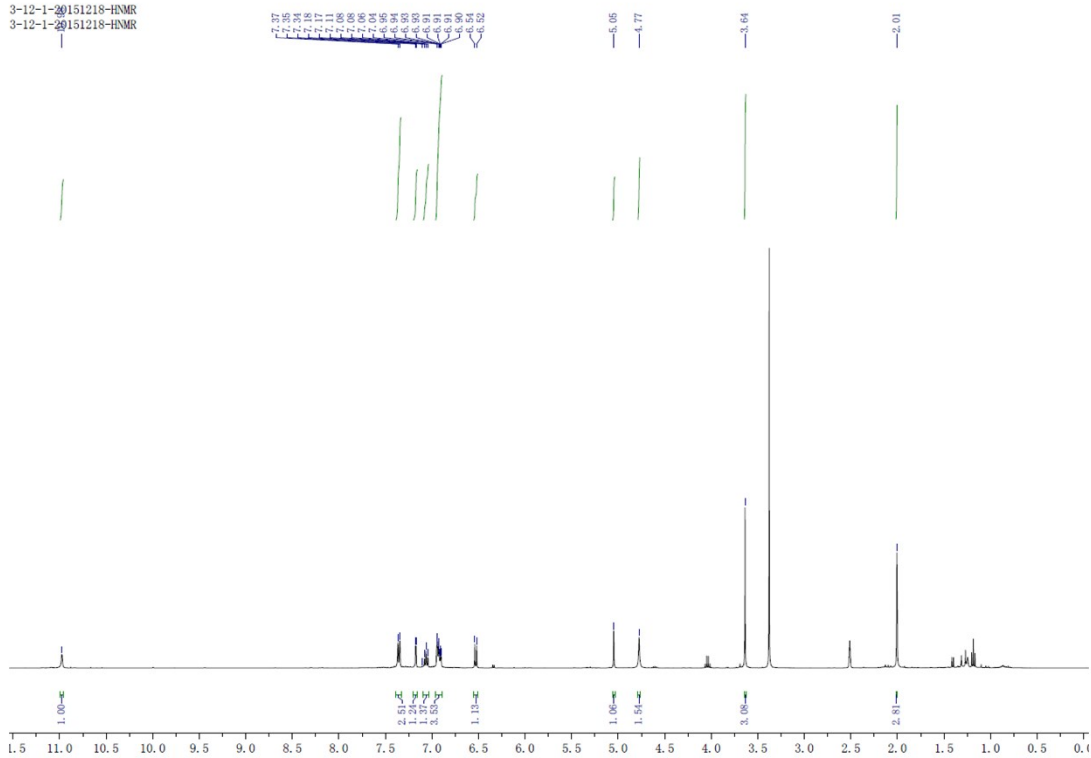

3-12-1-20151218-CNMR  
3-12-1-20151218-CNMR

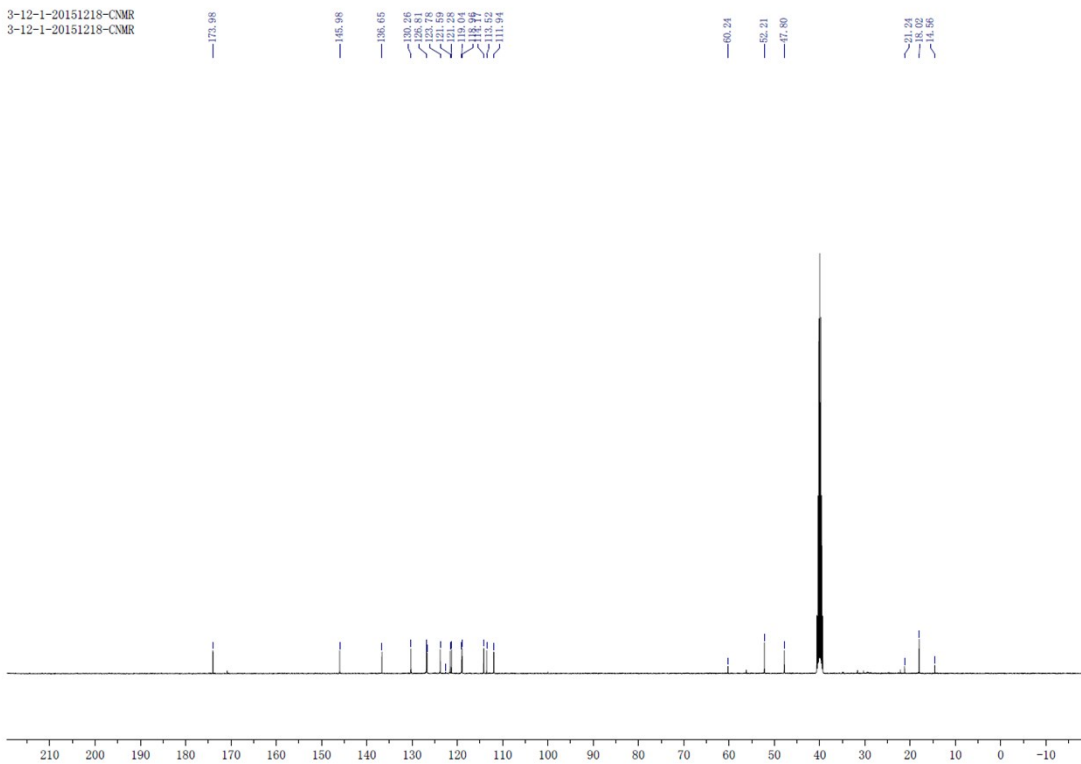

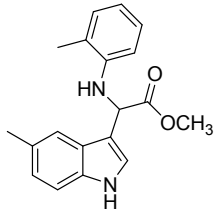

(3ii)

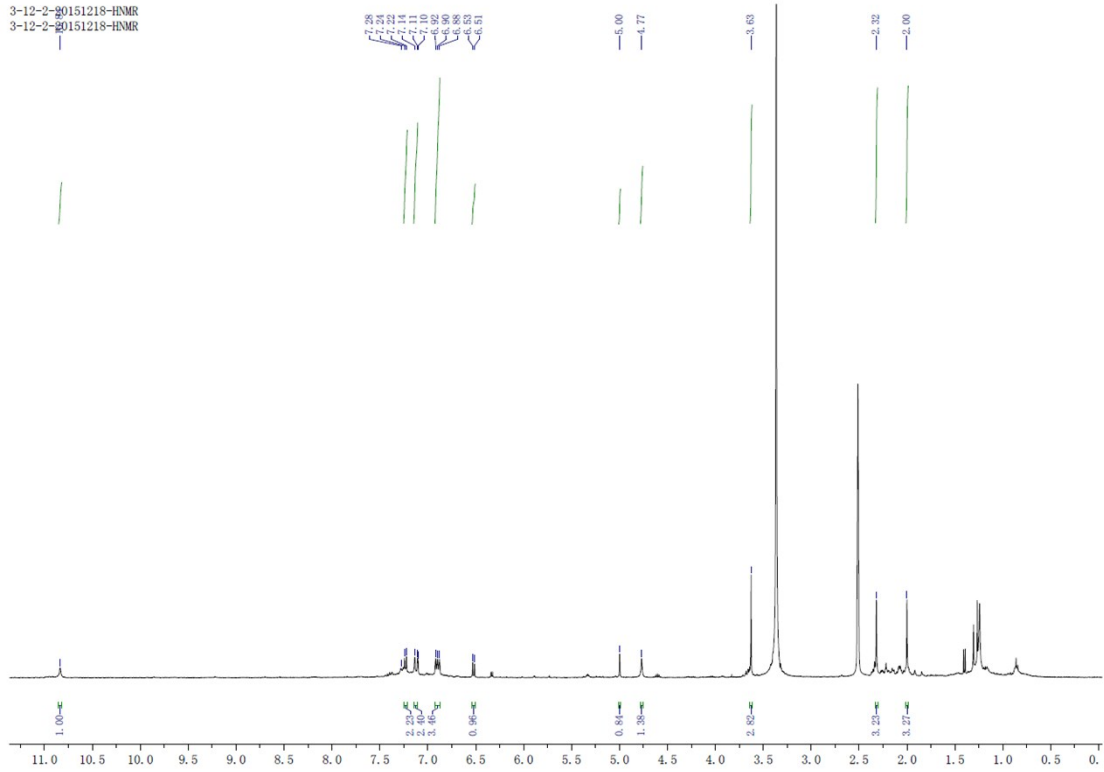

3-12-2-20151218-CNMR

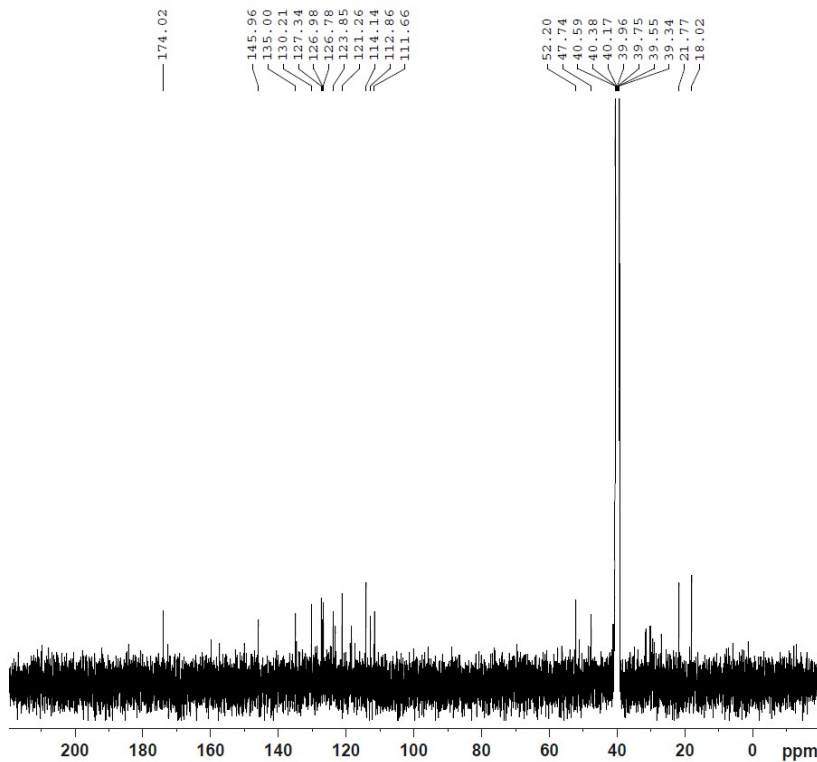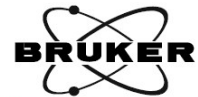

NAME 3-12-2-20151218-CNMR  
EXPNO 1  
PROCNO 1  
Date 20151219  
Time 6.18  
INSTRUM spect  
PROBHD 5 mm PABBO BB-  
PULPROG zgpg30  
TD 65536  
SOLVENT DMSO  
NS 4000  
DS 4  
SWH 24038.461 Hz  
FIDRES 0.366798 Hz  
AQ 1.3631988 sec  
RG 203  
LW 20.800 usec  
DE 6.50 usec  
TE 294.6 K  
D1 2.00000000 sec  
D11 0.03000000 sec  
TD0 1

----- CHANNEL f1 -----  
NUC1 <sup>13</sup>C  
P1 11.92 usec  
PL1 -0.20 dB  
PL1W 38.13888550 W  
SFO1 100.6479773 MHz

----- CHANNEL f2 -----  
CFDPRG2 waltz16  
NUC2 <sup>1</sup>H  
PCPD2 80.00 usec  
PL2 0.50 dB  
PL12 14.45 dB  
PL13 15.52 dB  
PL2W 9.73843670 W  
PL12W 0.39218345 W  
PL13W 0.30654144 W  
SPO2 400.2316009 MHz  
SI 32768  
SF 100.6379140 MHz  
WDW EM  
SBB 0  
LB 1.00 Hz  
GB 0  
PC 1.40

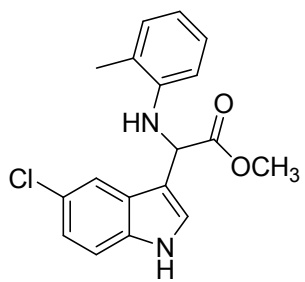

(3j)

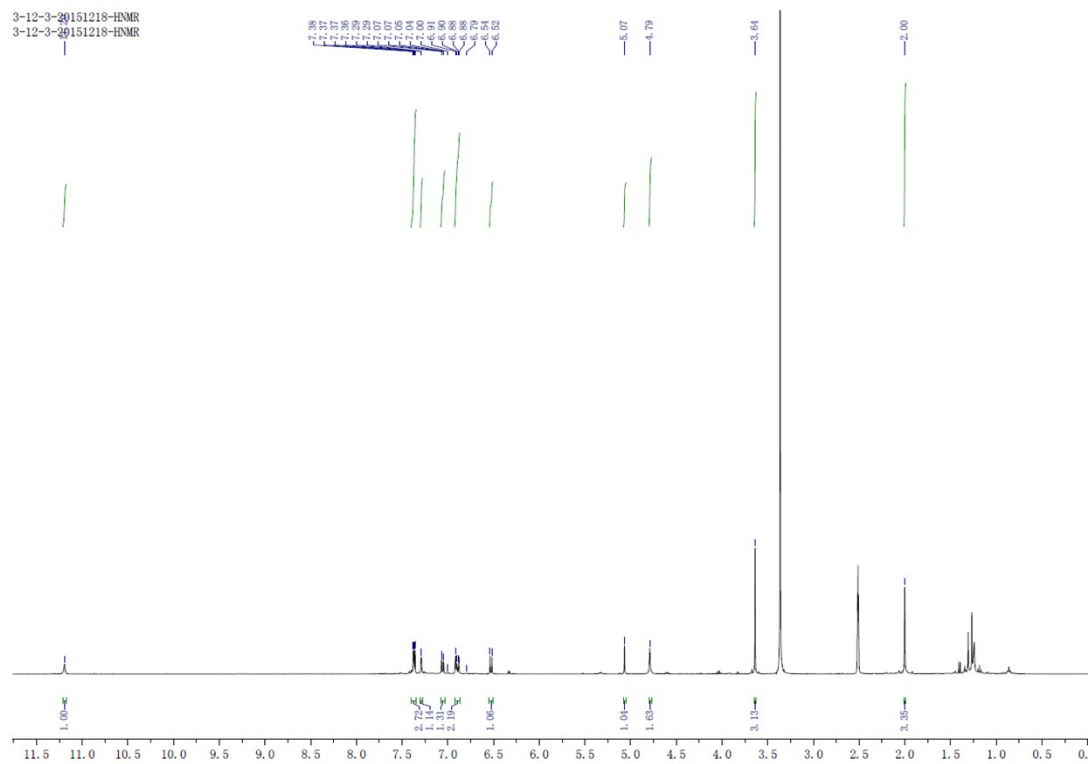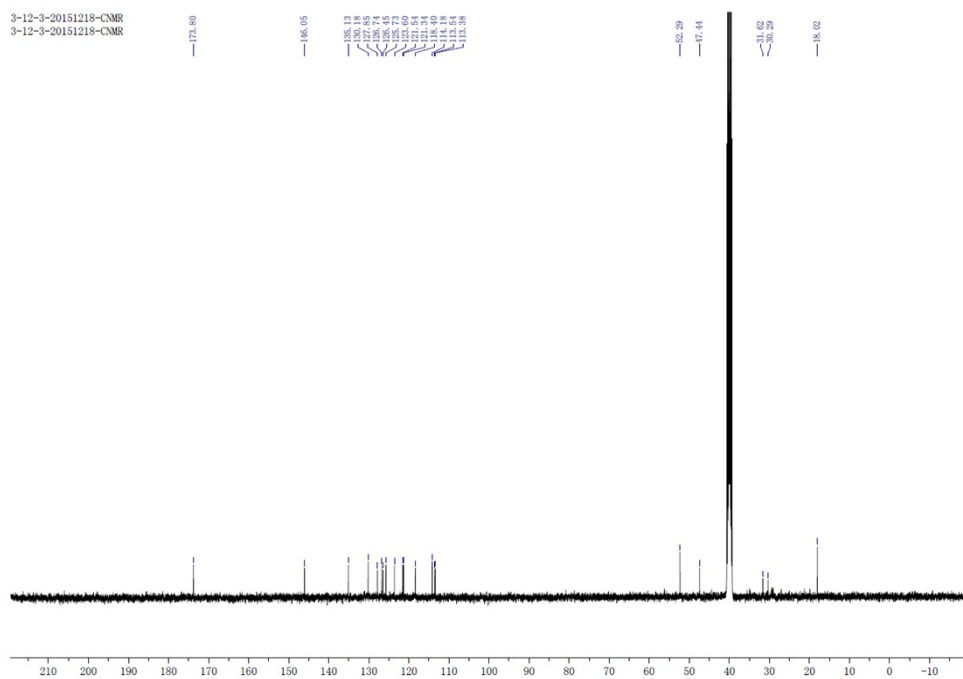

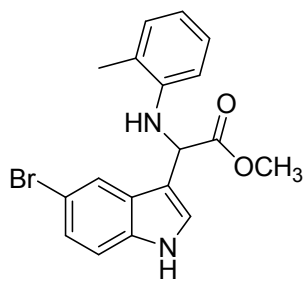

3-12-4-20151221-HMR  
3-12-4-20151221-HMR

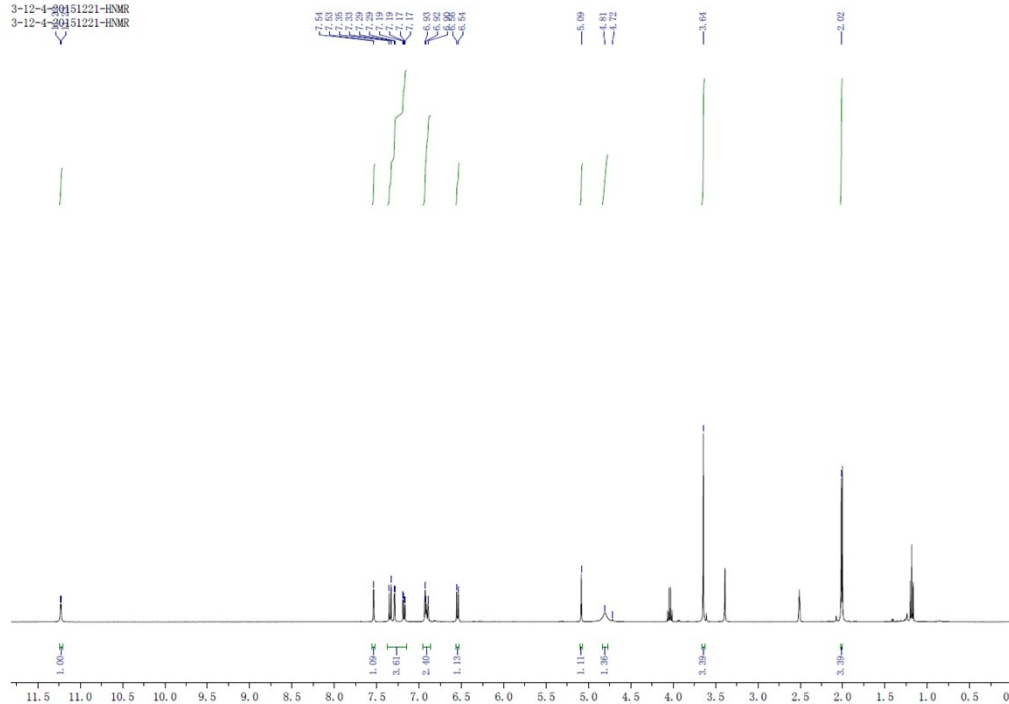

3-12-4-20151221-CNMR

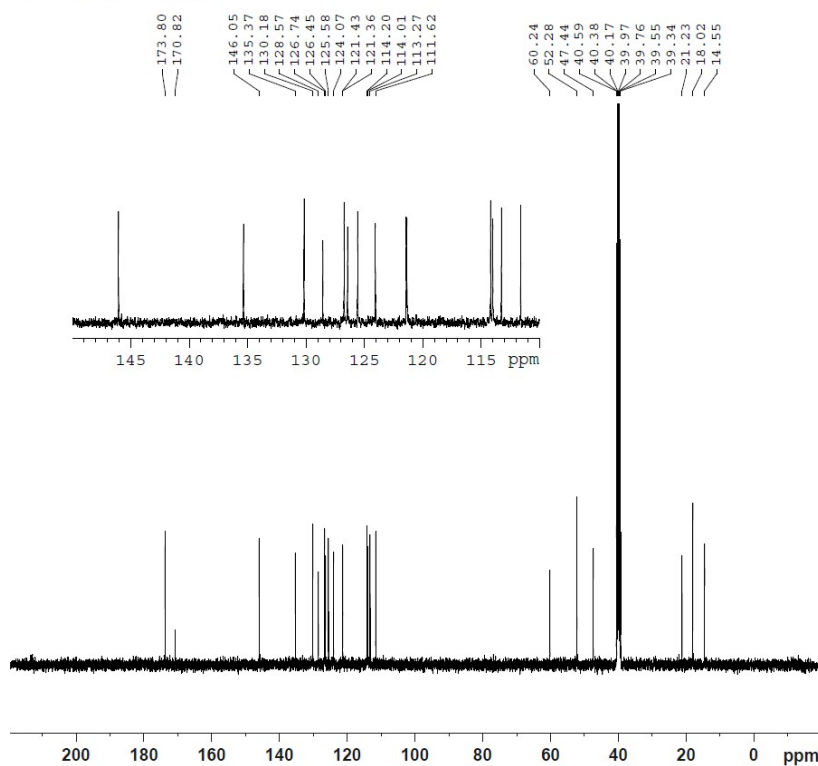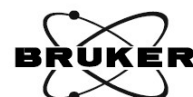

```

NAME 3-12-4-20151221-CNMR
EXPNO 1
PROCNO 1
Date_ 20151221
Time 14.01
INSTRUM spect
PROBHD 5 mm PABBO BB-
PULPROG zgpg30
TD 65536
SOLVENT DMSO
NS 156
DS 4
SWH 24038.461 Hz
FIDRES 0.366798 Hz
AQ 1.3631988 sec
RG 203
DW 20.800 usec
DE 6.50 usec
TE 295.1 K
D1 2.0000000 sec
D11 0.0300000 sec
TDO 1

===== CHANNEL f1 =====
NUC1 13C
P1 11.92 usec
PL1 -0.20 dB
PL1W 38.13888550 W
SFO1 100.6479773 MHz

===== CHANNEL f2 =====
CPDPRG2 waltz16
NUC2 1H
PCPD2 80.00 usec
PL2 0.50 dB
PL12 14.45 dB
PL13 15.52 dB
PL2W 9.73843670 W
PL12W 0.39218345 W
PL13W 0.30654144 W
SFO2 400.2316009 MHz
SI 32768
SF 100.6379140 MHz
WDW EM
SSB 0
LB 1.00 Hz
GB 0
PC 1.40

```

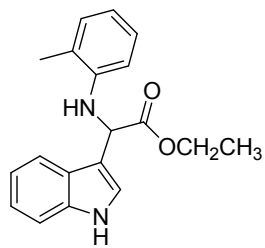

3-11-1-20151217-HMR  
3-11-1-20151217-HMR

7.297, 7.294, 7.291, 7.177, 7.174, 7.088, 7.085, 7.052, 7.049, 6.983, 6.980, 6.952, 6.949, 5.01, 4.77, 4.74, 4.73, 4.11, 4.08, 4.07, 4.06, 4.05, 4.03, 4.01, 2.01, 1.20, 1.19, 1.17, 1.16

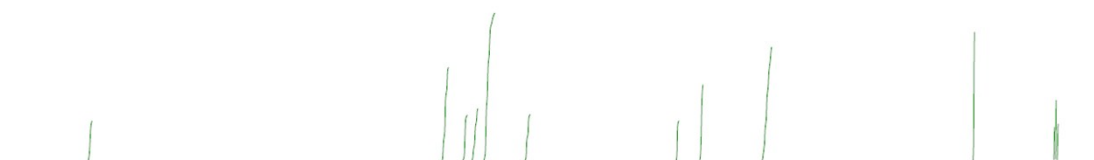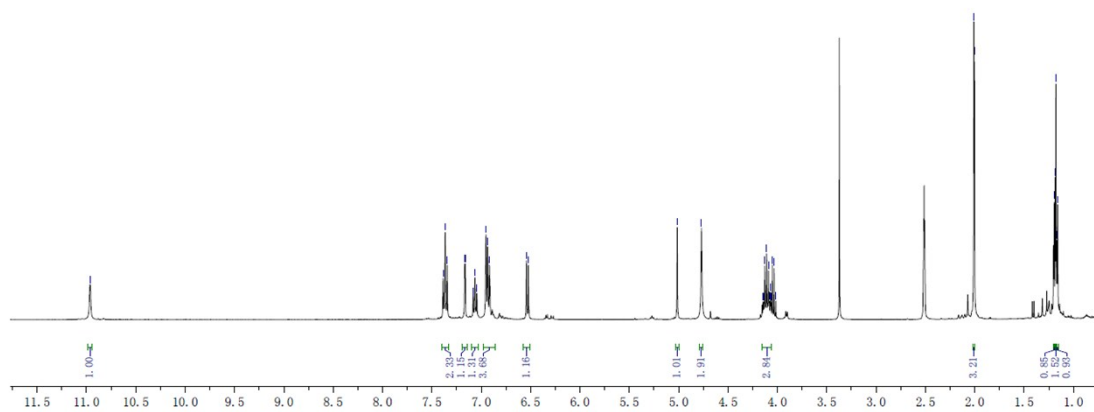

3-11-1-20151217-CMR  
3-11-1-20151217-CMR

165.94, 138.66, 130.25, 127.84, 126.53, 121.58, 119.07, 118.93, 115.68, 111.93, 60.99, 60.24, 47.96, 31.24, 20.71, 18.97

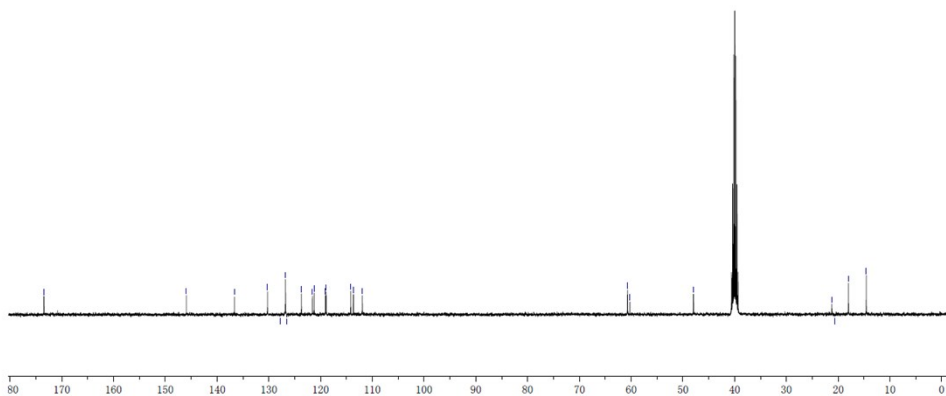

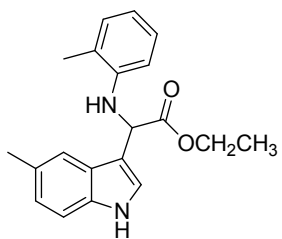

(3mm)

3-11-2-20151217-HMR  
3-11-2-20151217-HMR

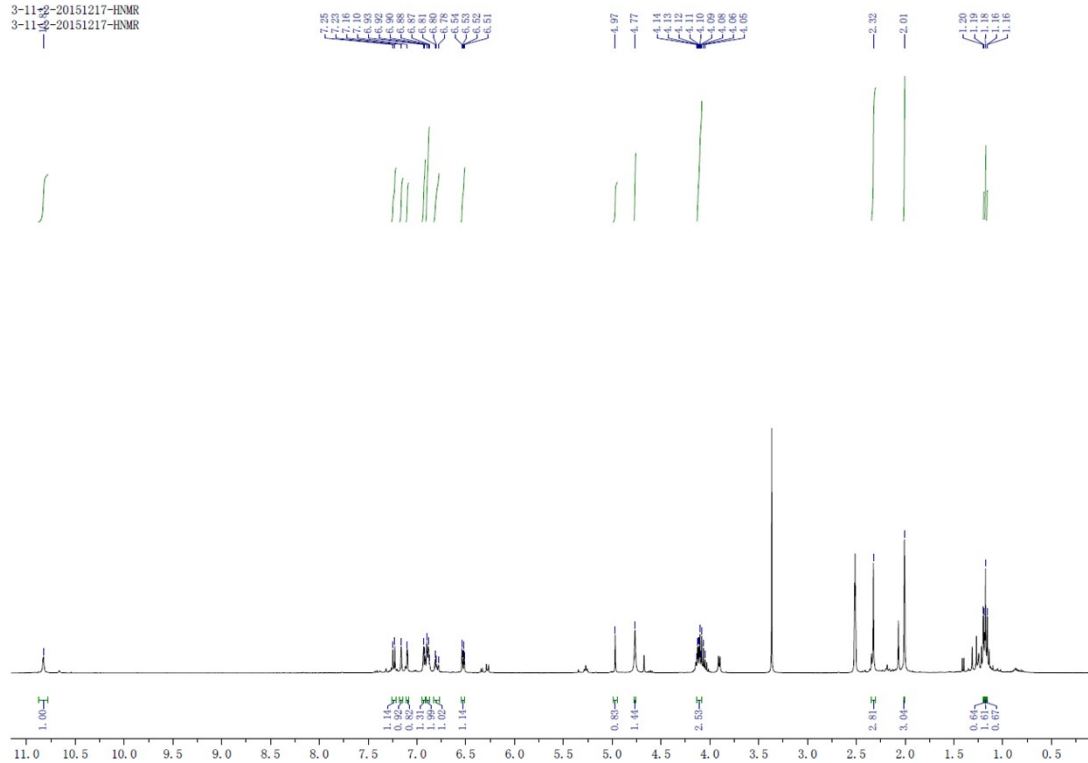

3-11-2-20151217-CNMR  
3-11-2-20151217-CNMR

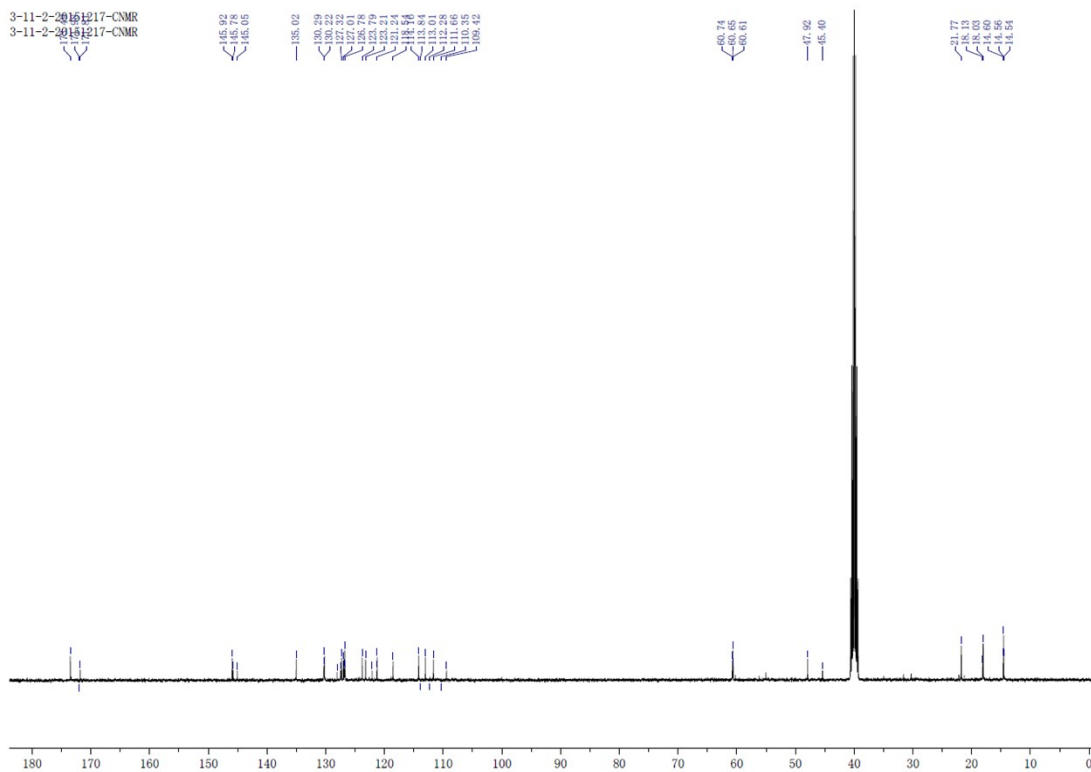

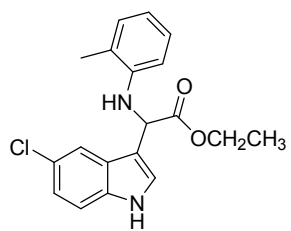

3-11-3-20151218-HNMR  
 3-11-3-20151218-HNMR

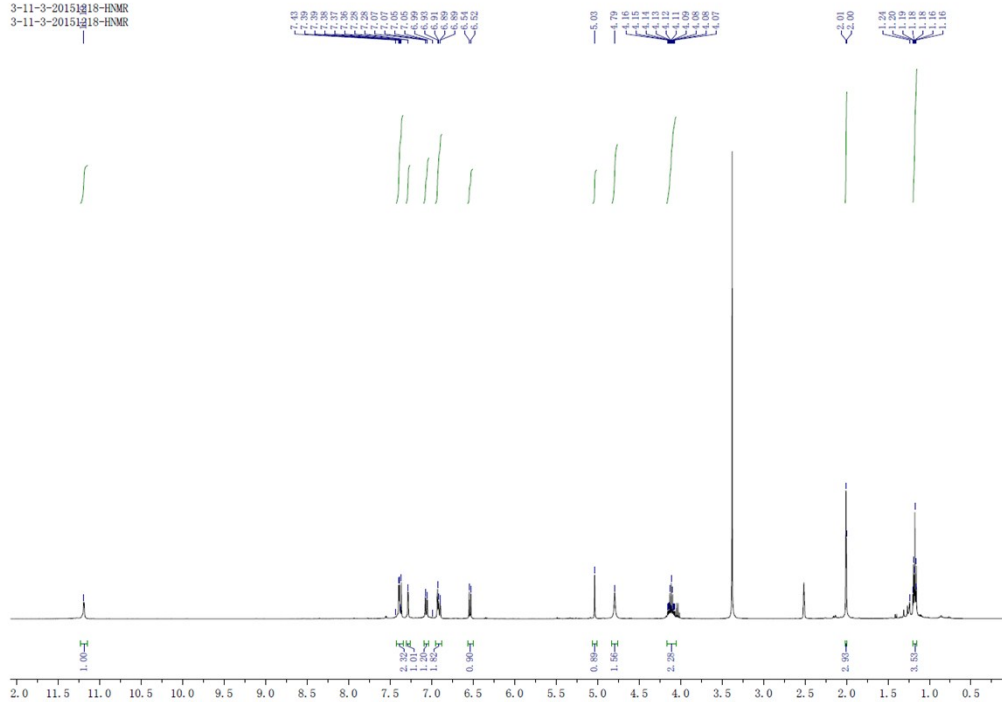

3-11-3-20151218-CNMR  
 3-11-3-20151218-CNMR

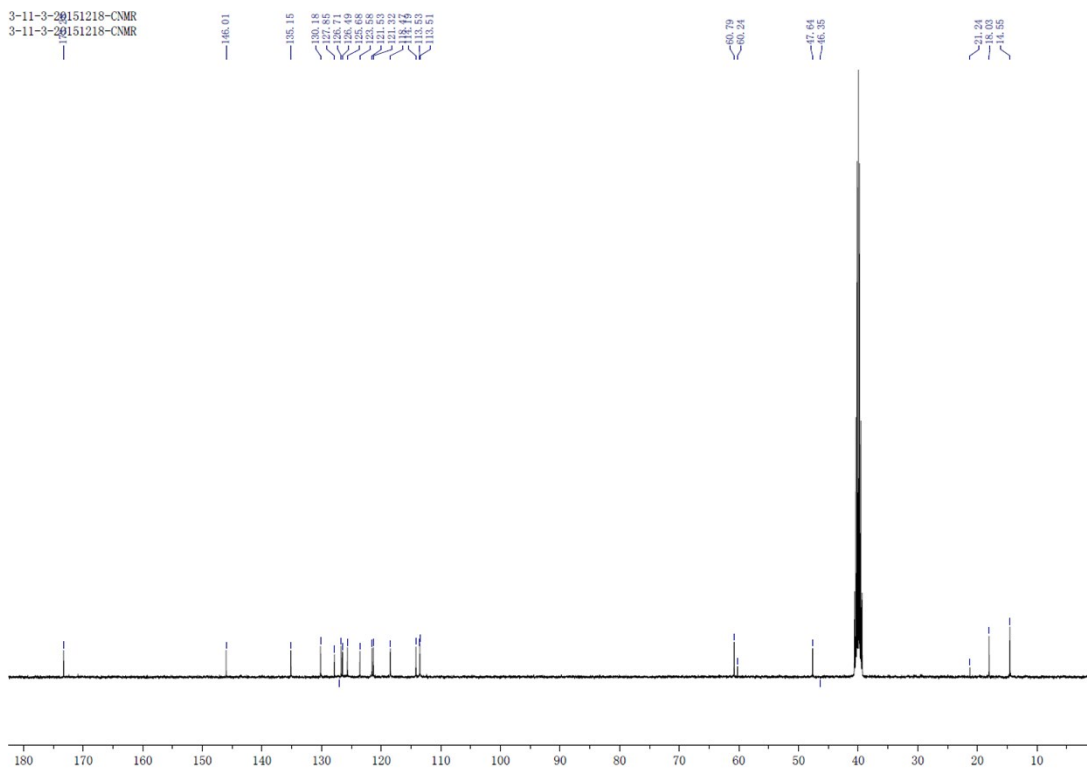

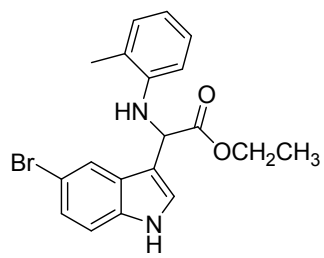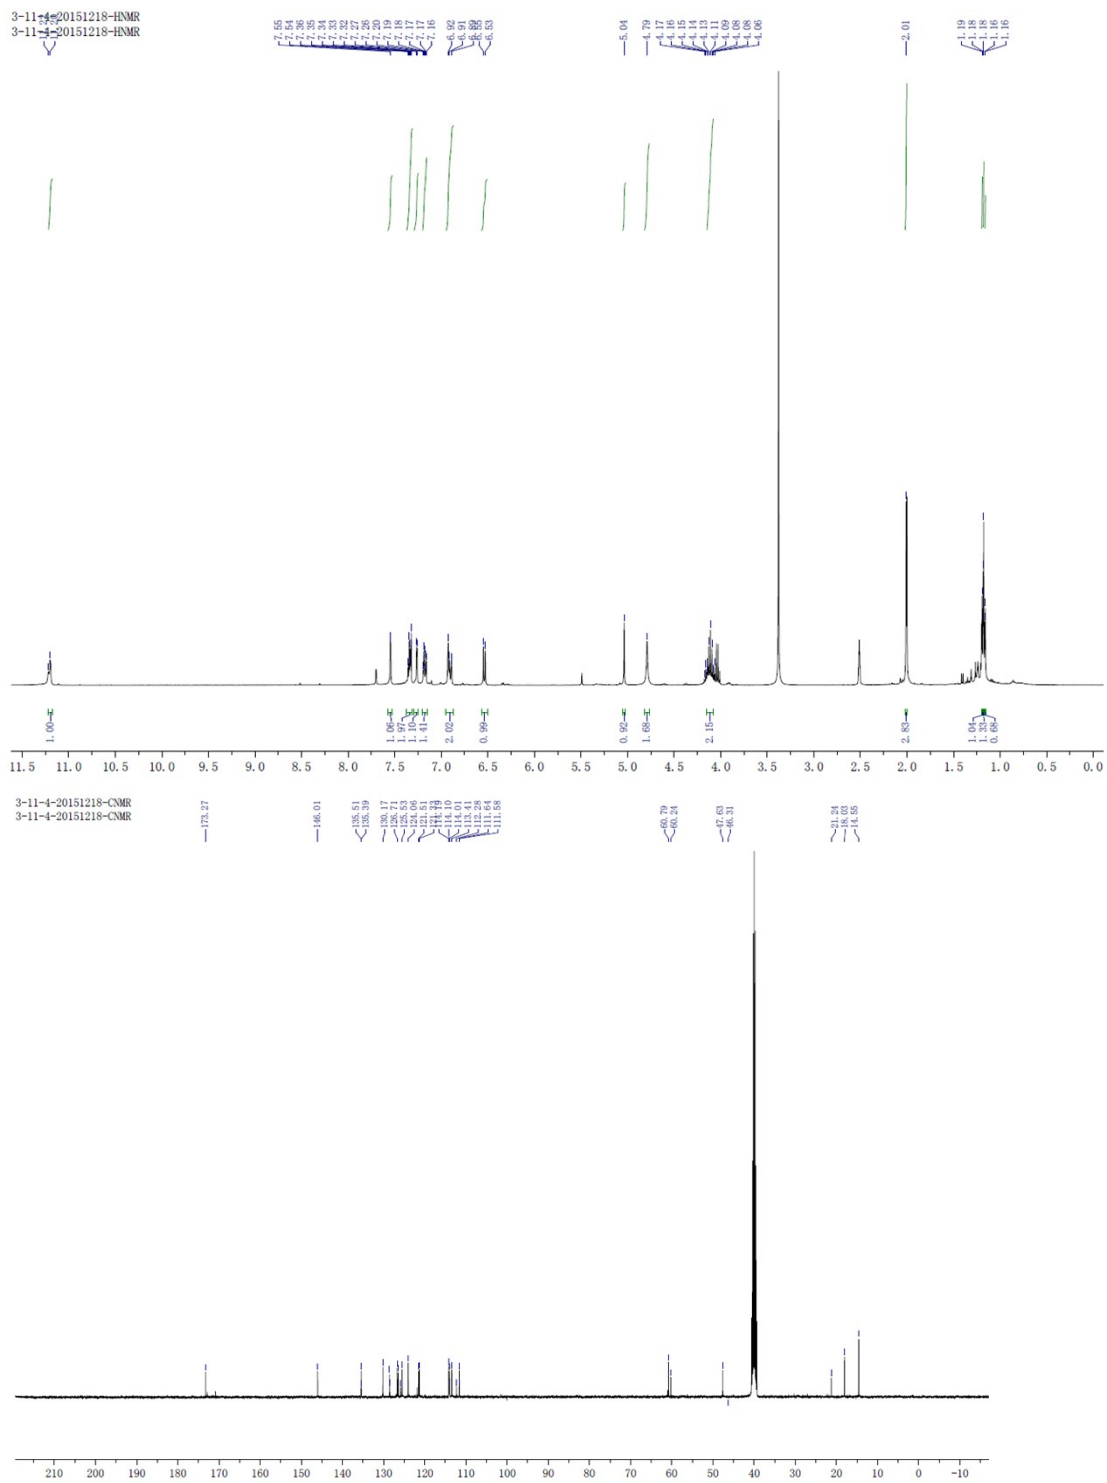



## 5. Referneces (cited in SI)

- S1. F. J. Lakner, M. A. Parker, B. Rogovoy and A. K. Alexander, *Synthesis*, 2009, 1987.
- S2. Z. K. Chen, Q. Q. Yan, Z. X. Liu, Y. M. Xu and Y. H. Zhang, *Angew. Chem. Int. Ed.* 2013, **52**, 13324.
- S3. X. D. Li, M. Chen, X. Xie, N. Sun, S. Li and Y. H. Liu, *Org. Lett.* 2015, **17**, 2984.
- S4. P. S. Naidu, S. Kolita, M. Sharma and P. J. Bhuyan, *J. Org. Chem.* 2015, **80**, 6381.
- S5. Z. Q. Wang, M. Hu, X. C. Huang, L. B. Gong, Y. X. Xie and J. H. Li, *J. Org. Chem.* 2012, **77**, 8705.
